# Supplementary material
Source: ML conference proceedings conference paper supplement (https://proceedings.neurips.cc/paper_files/paper/2022/hash/17a234c91f746d9625a75cf8a8731ee2-Abstract.html)
Supplement: Supplementary file 1 [file 17a234c91f746d9625a75cf8a8731ee2-Supplemental-Conference.zip]

Archive with 80 entries (74 files):
- NeurIPS_2022_supplement/
- __MACOSX/._NeurIPS_2022_supplement
- NeurIPS_2022_supplement/.DS_Store
- __MACOSX/NeurIPS_2022_supplement/._.DS_Store
- NeurIPS_2022_supplement/main_paper.pdf
- NeurIPS_2022_supplement/code/
- __MACOSX/NeurIPS_2022_supplement/._code
- NeurIPS_2022_supplement/appendices.pdf
- NeurIPS_2022_supplement/code/Homogenization-main/
- __MACOSX/NeurIPS_2022_supplement/code/._Homogenization-main
- NeurIPS_2022_supplement/code/Homogenization-main/README.md
- __MACOSX/NeurIPS_2022_supplement/code/Homogenization-main/._README.md
- NeurIPS_2022_supplement/code/Homogenization-main/.gitignore
- __MACOSX/NeurIPS_2022_supplement/code/Homogenization-main/._.gitignore
- NeurIPS_2022_supplement/code/Homogenization-main/src/
- __MACOSX/NeurIPS_2022_supplement/code/Homogenization-main/._src
- NeurIPS_2022_supplement/code/Homogenization-main/src/train_nlp.py
- __MACOSX/NeurIPS_2022_supplement/code/Homogenization-main/src/._train_nlp.py
- NeurIPS_2022_supplement/code/Homogenization-main/src/ACS_experiment_logistic_results.txt
- __MACOSX/NeurIPS_2022_supplement/code/Homogenization-main/src/._ACS_experiment_logistic_results.txt
- NeurIPS_2022_supplement/code/Homogenization-main/src/nlp_experiments.py
- __MACOSX/NeurIPS_2022_supplement/code/Homogenization-main/src/._nlp_experiments.py
- NeurIPS_2022_supplement/code/Homogenization-main/src/toy_nlp.py
- __MACOSX/NeurIPS_2022_supplement/code/Homogenization-main/src/._toy_nlp.py
- NeurIPS_2022_supplement/code/Homogenization-main/src/ACS_experiments.py
- __MACOSX/NeurIPS_2022_supplement/code/Homogenization-main/src/._ACS_experiments.py
- NeurIPS_2022_supplement/code/Homogenization-main/src/nlp_groupings.py
- __MACOSX/NeurIPS_2022_supplement/code/Homogenization-main/src/._nlp_groupings.py
- NeurIPS_2022_supplement/code/Homogenization-main/src/preprocess_names.py
- __MACOSX/NeurIPS_2022_supplement/code/Homogenization-main/src/._preprocess_names.py
- NeurIPS_2022_supplement/code/Homogenization-main/src/fig_size.py
- __MACOSX/NeurIPS_2022_supplement/code/Homogenization-main/src/._fig_size.py
- NeurIPS_2022_supplement/code/Homogenization-main/src/__pycache__/
- __MACOSX/NeurIPS_2022_supplement/code/Homogenization-main/src/.___pycache__
- NeurIPS_2022_supplement/code/Homogenization-main/src/word_list.py
- __MACOSX/NeurIPS_2022_supplement/code/Homogenization-main/src/._word_list.py
- NeurIPS_2022_supplement/code/Homogenization-main/src/train_nlp.sh
- __MACOSX/NeurIPS_2022_supplement/code/Homogenization-main/src/._train_nlp.sh
- NeurIPS_2022_supplement/code/Homogenization-main/src/cv_groupings.py
- __MACOSX/NeurIPS_2022_supplement/code/Homogenization-main/src/._cv_groupings.py
- NeurIPS_2022_supplement/code/Homogenization-main/src/cv_experiments.py
- __MACOSX/NeurIPS_2022_supplement/code/Homogenization-main/src/._cv_experiments.py
- NeurIPS_2022_supplement/code/Homogenization-main/src/cv_global_correlations.txt
- __MACOSX/NeurIPS_2022_supplement/code/Homogenization-main/src/._cv_global_correlations.txt
- NeurIPS_2022_supplement/code/Homogenization-main/src/collapse_acs.py
- __MACOSX/NeurIPS_2022_supplement/code/Homogenization-main/src/._collapse_acs.py
- NeurIPS_2022_supplement/code/Homogenization-main/src/cv_experiments.out
- __MACOSX/NeurIPS_2022_supplement/code/Homogenization-main/src/._cv_experiments.out
- NeurIPS_2022_supplement/code/Homogenization-main/src/visuals.py
- __MACOSX/NeurIPS_2022_supplement/code/Homogenization-main/src/._visuals.py
- NeurIPS_2022_supplement/code/Homogenization-main/src/topic_model.py
- __MACOSX/NeurIPS_2022_supplement/code/Homogenization-main/src/._topic_model.py
- NeurIPS_2022_supplement/code/Homogenization-main/src/firstnames.csv
- __MACOSX/NeurIPS_2022_supplement/code/Homogenization-main/src/._firstnames.csv
- NeurIPS_2022_supplement/code/Homogenization-main/src/conf/
- __MACOSX/NeurIPS_2022_supplement/code/Homogenization-main/src/._conf
- NeurIPS_2022_supplement/code/Homogenization-main/src/adaptation_nlp.py
- __MACOSX/NeurIPS_2022_supplement/code/Homogenization-main/src/._adaptation_nlp.py
- NeurIPS_2022_supplement/code/Homogenization-main/src/ACS_experiment_gbm_results.txt
- __MACOSX/NeurIPS_2022_supplement/code/Homogenization-main/src/._ACS_experiment_gbm_results.txt
- NeurIPS_2022_supplement/code/Homogenization-main/src/schema.py
- __MACOSX/NeurIPS_2022_supplement/code/Homogenization-main/src/._schema.py
- NeurIPS_2022_supplement/code/Homogenization-main/src/data_nlp.py
- __MACOSX/NeurIPS_2022_supplement/code/Homogenization-main/src/._data_nlp.py
- NeurIPS_2022_supplement/code/Homogenization-main/src/homogenization.py
- __MACOSX/NeurIPS_2022_supplement/code/Homogenization-main/src/._homogenization.py
- NeurIPS_2022_supplement/code/Homogenization-main/src/__pycache__/adaptation_nlp.cpython-38.pyc
- __MACOSX/NeurIPS_2022_supplement/code/Homogenization-main/src/__pycache__/._adaptation_nlp.cpython-38.pyc
- NeurIPS_2022_supplement/code/Homogenization-main/src/__pycache__/schema.cpython-38.pyc
- __MACOSX/NeurIPS_2022_supplement/code/Homogenization-main/src/__pycache__/._schema.cpython-38.pyc
- NeurIPS_2022_supplement/code/Homogenization-main/src/__pycache__/data_nlp.cpython-38.pyc
- __MACOSX/NeurIPS_2022_supplement/code/Homogenization-main/src/__pycache__/._data_nlp.cpython-38.pyc
- NeurIPS_2022_supplement/code/Homogenization-main/src/__pycache__/homogenization.cpython-38.pyc
- __MACOSX/NeurIPS_2022_supplement/code/Homogenization-main/src/__pycache__/._homogenization.cpython-38.pyc
- NeurIPS_2022_supplement/code/Homogenization-main/src/conf/test.yaml
- __MACOSX/NeurIPS_2022_supplement/code/Homogenization-main/src/conf/._test.yaml
- NeurIPS_2022_supplement/code/Homogenization-main/src/conf/train_nlp.yaml
- __MACOSX/NeurIPS_2022_supplement/code/Homogenization-main/src/conf/._train_nlp.yaml
- NeurIPS_2022_supplement/code/Homogenization-main/src/conf/cluster_test.yaml
- __MACOSX/NeurIPS_2022_supplement/code/Homogenization-main/src/conf/._cluster_test.yaml
