# Supplementary material
Source: ML conference proceedings conference paper supplement (https://proceedings.neurips.cc/paper_files/paper/2022/hash/17a234c91f746d9625a75cf8a8731ee2-Abstract.html)
Supplement: Supplementary file 1 [file 17a234c91f746d9625a75cf8a8731ee2-Supplemental-Conference.zip › NeurIPS_2022_supplement/code/Homogenization-main/README.md]

# Homogenization

Further instructions on how to run the codebase, along with a pip installable toolkit for measuring homogenization on novel data as a standalone metric, will be released upon acceptance and public announcement of this work. 
