# Supplementary material
Source: ML conference proceedings conference paper supplement (https://proceedings.neurips.cc/paper_files/paper/2022/hash/17a234c91f746d9625a75cf8a8731ee2-Abstract.html)
Supplement: Supplementary file 1 [file 17a234c91f746d9625a75cf8a8731ee2-Supplemental-Conference.zip › NeurIPS_2022_supplement/code/Homogenization-main/src/ACS_experiment_gbm_results.txt]

Applications: ['employment', 'income-poverty', 'health-insurance'], ML method: gbm, grouping function: individual, seed: 0.
Average: 1.2031856215546266, Uniform: 1.2031856215502368, Worst: 164.7056269777892

Applications: ['employment', 'income-poverty', 'health-insurance'], ML method: gbm, grouping function: race, seed: 0.
Average: 1.0334358240226362, Uniform: 0.7506153099654189, Worst: 1.2636762390854952
{'avg': 1.0334358240226362, 'unif': 0.7506153099654189, 'worst': 1.2636762390854952, 'statistics': {'employment': {'N': 647222, 'error_rate': 0.17329448010110904, 'group_statistics': {1: {'group_count': 496856, 'group_errors': 85633, 'group_frequency': 0.7676747700170884, 'group_error_rate': 0.1723497351345259}, 2: {'group_count': 62327, 'group_errors': 10865, 'group_frequency': 0.09629926053193495, 'group_error_rate': 0.17432252474850385}, 3: {'group_count': 5758, 'group_errors': 1240, 'group_frequency': 0.008896483741281972, 'group_error_rate': 0.21535255296978117}, 4: {'group_count': 432, 'group_errors': 94, 'group_frequency': 0.0006674680403323743, 'group_error_rate': 0.2175925925925926}, 5: {'group_count': 926, 'group_errors': 171, 'group_frequency': 0.0014307301049717098, 'group_error_rate': 0.18466522678185746}, 6: {'group_count': 34789, 'group_errors': 6765, 'group_frequency': 0.05375126309056243, 'group_error_rate': 0.19445801833913018}, 7: {'group_count': 1127, 'group_errors': 219, 'group_frequency': 0.0017412881515152451, 'group_error_rate': 0.19432120674356698}, 8: {'group_count': 24559, 'group_errors': 4329, 'group_frequency': 0.03794524907991385, 'group_error_rate': 0.1762693920762246}, 9: {'group_count': 20448, 'group_errors': 2844, 'group_frequency': 0.031593487242399056, 'group_error_rate': 0.13908450704225353}}}, 'income-poverty': {'N': 647222, 'error_rate': 0.23251372790170916, 'group_statistics': {1: {'group_count': 496856, 'group_errors': 111800, 'group_frequency': 0.7676747700170884, 'group_error_rate': 0.22501489365127925}, 2: {'group_count': 62327, 'group_errors': 15590, 'group_frequency': 0.09629926053193495, 'group_error_rate': 0.250132366390168}, 3: {'group_count': 5758, 'group_errors': 1606, 'group_frequency': 0.008896483741281972, 'group_error_rate': 0.27891629037860366}, 4: {'group_count': 432, 'group_errors': 119, 'group_frequency': 0.0006674680403323743, 'group_error_rate': 0.27546296296296297}, 5: {'group_count': 926, 'group_errors': 260, 'group_frequency': 0.0014307301049717098, 'group_error_rate': 0.28077753779697623}, 6: {'group_count': 34789, 'group_errors': 8171, 'group_frequency': 0.05375126309056243, 'group_error_rate': 0.23487309206933227}, 7: {'group_count': 1127, 'group_errors': 292, 'group_frequency': 0.0017412881515152451, 'group_error_rate': 0.259094942324756}, 8: {'group_count': 24559, 'group_errors': 7262, 'group_frequency': 0.03794524907991385, 'group_error_rate': 0.29569607883057125}, 9: {'group_count': 20448, 'group_errors': 5388, 'group_frequency': 0.031593487242399056, 'group_error_rate': 0.2634976525821596}}}, 'health-insurance': {'N': 647222, 'error_rate': 0.1506809101050335, 'group_statistics': {1: {'group_count': 496856, 'group_errors': 80429, 'group_frequency': 0.7676747700170884, 'group_error_rate': 0.16187587550517654}, 2: {'group_count': 62327, 'group_errors': 6517, 'group_frequency': 0.09629926053193495, 'group_error_rate': 0.10456142602724341}, 3: {'group_count': 5758, 'group_errors': 405, 'group_frequency': 0.008896483741281972, 'group_error_rate': 0.0703369225425495}, 4: {'group_count': 432, 'group_errors': 12, 'group_frequency': 0.0006674680403323743, 'group_error_rate': 0.027777777777777776}, 5: {'group_count': 926, 'group_errors': 75, 'group_frequency': 0.0014307301049717098, 'group_error_rate': 0.08099352051835854}, 6: {'group_count': 34789, 'group_errors': 5844, 'group_frequency': 0.05375126309056243, 'group_error_rate': 0.16798413291557676}, 7: {'group_count': 1127, 'group_errors': 96, 'group_frequency': 0.0017412881515152451, 'group_error_rate': 0.08518189884649512}, 8: {'group_count': 24559, 'group_errors': 2114, 'group_frequency': 0.03794524907991385, 'group_error_rate': 0.08607842338857445}, 9: {'group_count': 20448, 'group_errors': 2032, 'group_frequency': 0.031593487242399056, 'group_error_rate': 0.09937402190923318}}}}}

---

Applications: ['employment', 'income-poverty', 'health-insurance'], ML method: gbm, grouping function: individual, seed: 1.
Average: 1.20865712618688, Uniform: 1.2086571261824723, Worst: 166.6530640225974

Applications: ['employment', 'income-poverty', 'health-insurance'], ML method: gbm, grouping function: race, seed: 1.
Average: 1.029816991269291, Uniform: 0.7693628426339917, Worst: 1.2452242954449069
{'avg': 1.029816991269291, 'unif': 0.7693628426339917, 'worst': 1.2452242954449069, 'statistics': {'employment': {'N': 647222, 'error_rate': 0.17318632555753669, 'group_statistics': {1: {'group_count': 497396, 'group_errors': 85426, 'group_frequency': 0.7685091050675039, 'group_error_rate': 0.1717464555404547}, 2: {'group_count': 62140, 'group_errors': 10925, 'group_frequency': 0.09601033339410589, 'group_error_rate': 0.17581268104280656}, 3: {'group_count': 5623, 'group_errors': 1176, 'group_frequency': 0.008687899978678104, 'group_error_rate': 0.20914102792103859}, 4: {'group_count': 432, 'group_errors': 97, 'group_frequency': 0.0006674680403323743, 'group_error_rate': 0.22453703703703703}, 5: {'group_count': 928, 'group_errors': 180, 'group_frequency': 0.0014338202347880635, 'group_error_rate': 0.1939655172413793}, 6: {'group_count': 34728, 'group_errors': 6713, 'group_frequency': 0.05365701413116365, 'group_error_rate': 0.19330223450817785}, 7: {'group_count': 1123, 'group_errors': 195, 'group_frequency': 0.001735107891882538, 'group_error_rate': 0.1736420302760463}, 8: {'group_count': 24569, 'group_errors': 4540, 'group_frequency': 0.037960699728995614, 'group_error_rate': 0.18478570556392201}, 9: {'group_count': 20283, 'group_errors': 2838, 'group_frequency': 0.031338551532549885, 'group_error_rate': 0.1399201301582606}}}, 'income-poverty': {'N': 647222, 'error_rate': 0.23074462858184672, 'group_statistics': {1: {'group_count': 497396, 'group_errors': 111243, 'group_frequency': 0.7685091050675039, 'group_error_rate': 0.22365077322696603}, 2: {'group_count': 62140, 'group_errors': 15338, 'group_frequency': 0.09601033339410589, 'group_error_rate': 0.24682973929835855}, 3: {'group_count': 5623, 'group_errors': 1505, 'group_frequency': 0.008687899978678104, 'group_error_rate': 0.26765072025609105}, 4: {'group_count': 432, 'group_errors': 104, 'group_frequency': 0.0006674680403323743, 'group_error_rate': 0.24074074074074073}, 5: {'group_count': 928, 'group_errors': 244, 'group_frequency': 0.0014338202347880635, 'group_error_rate': 0.2629310344827586}, 6: {'group_count': 34728, 'group_errors': 8133, 'group_frequency': 0.05365701413116365, 'group_error_rate': 0.23419143054595715}, 7: {'group_count': 1123, 'group_errors': 306, 'group_frequency': 0.001735107891882538, 'group_error_rate': 0.27248441674087265}, 8: {'group_count': 24569, 'group_errors': 7212, 'group_frequency': 0.037960699728995614, 'group_error_rate': 0.2935406406447149}, 9: {'group_count': 20283, 'group_errors': 5258, 'group_frequency': 0.031338551532549885, 'group_error_rate': 0.25923186905290146}}}, 'health-insurance': {'N': 647222, 'error_rate': 0.1501555880362534, 'group_statistics': {1: {'group_count': 497396, 'group_errors': 80059, 'group_frequency': 0.7685091050675039, 'group_error_rate': 0.16095626020313794}, 2: {'group_count': 62140, 'group_errors': 6480, 'group_frequency': 0.09601033339410589, 'group_error_rate': 0.10428065658191181}, 3: {'group_count': 5623, 'group_errors': 397, 'group_frequency': 0.008687899978678104, 'group_error_rate': 0.07060288102436423}, 4: {'group_count': 432, 'group_errors': 17, 'group_frequency': 0.0006674680403323743, 'group_error_rate': 0.03935185185185185}, 5: {'group_count': 928, 'group_errors': 82, 'group_frequency': 0.0014338202347880635, 'group_error_rate': 0.08836206896551724}, 6: {'group_count': 34728, 'group_errors': 5732, 'group_frequency': 0.05365701413116365, 'group_error_rate': 0.16505413499193733}, 7: {'group_count': 1123, 'group_errors': 99, 'group_frequency': 0.001735107891882538, 'group_error_rate': 0.0881567230632235}, 8: {'group_count': 24569, 'group_errors': 2123, 'group_frequency': 0.037960699728995614, 'group_error_rate': 0.08640970328462697}, 9: {'group_count': 20283, 'group_errors': 2195, 'group_frequency': 0.031338551532549885, 'group_error_rate': 0.10821870531972588}}}}}

---

Applications: ['employment', 'income-poverty', 'health-insurance'], ML method: gbm, grouping function: individual, seed: 2.
Average: 1.2279586136756286, Uniform: 1.2279586136711462, Worst: 167.0018554018631

Applications: ['employment', 'income-poverty', 'health-insurance'], ML method: gbm, grouping function: race, seed: 2.
Average: 1.0308557721423965, Uniform: 0.7652379516157756, Worst: 1.2731515576210144
{'avg': 1.0308557721423965, 'unif': 0.7652379516157756, 'worst': 1.2731515576210144, 'statistics': {'employment': {'N': 647222, 'error_rate': 0.1722268402495589, 'group_statistics': {1: {'group_count': 497396, 'group_errors': 84897, 'group_frequency': 0.7685091050675039, 'group_error_rate': 0.17068291662980803}, 2: {'group_count': 62014, 'group_errors': 10849, 'group_frequency': 0.09581565521567562, 'group_error_rate': 0.17494436740090946}, 3: {'group_count': 5659, 'group_errors': 1197, 'group_frequency': 0.00874352231537247, 'group_error_rate': 0.21152147022442128}, 4: {'group_count': 404, 'group_errors': 86, 'group_frequency': 0.0006242062229034242, 'group_error_rate': 0.21287128712871287}, 5: {'group_count': 909, 'group_errors': 194, 'group_frequency': 0.0014044640015327043, 'group_error_rate': 0.21342134213421343}, 6: {'group_count': 34715, 'group_errors': 6723, 'group_frequency': 0.053636928287357354, 'group_error_rate': 0.19366268183782226}, 7: {'group_count': 1074, 'group_errors': 185, 'group_frequency': 0.001659399711381875, 'group_error_rate': 0.17225325884543763}, 8: {'group_count': 24612, 'group_errors': 4477, 'group_frequency': 0.038027137520047216, 'group_error_rate': 0.18190313668129368}, 9: {'group_count': 20439, 'group_errors': 2861, 'group_frequency': 0.03157958165822546, 'group_error_rate': 0.1399774940065561}}}, 'income-poverty': {'N': 647222, 'error_rate': 0.23131939272768848, 'group_statistics': {1: {'group_count': 497396, 'group_errors': 111429, 'group_frequency': 0.7685091050675039, 'group_error_rate': 0.2240247207456433}, 2: {'group_count': 62014, 'group_errors': 15463, 'group_frequency': 0.09581565521567562, 'group_error_rate': 0.24934692166285033}, 3: {'group_count': 5659, 'group_errors': 1573, 'group_frequency': 0.00874352231537247, 'group_error_rate': 0.2779643046474642}, 4: {'group_count': 404, 'group_errors': 119, 'group_frequency': 0.0006242062229034242, 'group_error_rate': 0.29455445544554454}, 5: {'group_count': 909, 'group_errors': 214, 'group_frequency': 0.0014044640015327043, 'group_error_rate': 0.23542354235423543}, 6: {'group_count': 34715, 'group_errors': 8038, 'group_frequency': 0.053636928287357354, 'group_error_rate': 0.23154256085265734}, 7: {'group_count': 1074, 'group_errors': 319, 'group_frequency': 0.001659399711381875, 'group_error_rate': 0.29702048417132215}, 8: {'group_count': 24612, 'group_errors': 7229, 'group_frequency': 0.038027137520047216, 'group_error_rate': 0.29371851129530313}, 9: {'group_count': 20439, 'group_errors': 5331, 'group_frequency': 0.03157958165822546, 'group_error_rate': 0.26082489358579186}}}, 'health-insurance': {'N': 647222, 'error_rate': 0.1503023692025302, 'group_statistics': {1: {'group_count': 497396, 'group_errors': 80337, 'group_frequency': 0.7685091050675039, 'group_error_rate': 0.16151517101062332}, 2: {'group_count': 62014, 'group_errors': 6369, 'group_frequency': 0.09581565521567562, 'group_error_rate': 0.1027026155384268}, 3: {'group_count': 5659, 'group_errors': 383, 'group_frequency': 0.00874352231537247, 'group_error_rate': 0.06767980208517406}, 4: {'group_count': 404, 'group_errors': 17, 'group_frequency': 0.0006242062229034242, 'group_error_rate': 0.04207920792079208}, 5: {'group_count': 909, 'group_errors': 69, 'group_frequency': 0.0014044640015327043, 'group_error_rate': 0.07590759075907591}, 6: {'group_count': 34715, 'group_errors': 5902, 'group_frequency': 0.053636928287357354, 'group_error_rate': 0.1700129626962408}, 7: {'group_count': 1074, 'group_errors': 92, 'group_frequency': 0.001659399711381875, 'group_error_rate': 0.0856610800744879}, 8: {'group_count': 24612, 'group_errors': 2092, 'group_frequency': 0.038027137520047216, 'group_error_rate': 0.08499918738826588}, 9: {'group_count': 20439, 'group_errors': 2018, 'group_frequency': 0.03157958165822546, 'group_error_rate': 0.09873281471696267}}}}}

---

Applications: ['employment', 'income-poverty', 'health-insurance'], ML method: gbm, grouping function: individual, seed: 3.
Average: 1.2227823104294246, Uniform: 1.2227823104249618, Worst: 166.7533949679445

Applications: ['employment', 'income-poverty', 'health-insurance'], ML method: gbm, grouping function: race, seed: 3.
Average: 1.0312461568821905, Uniform: 0.8084070646708165, Worst: 1.2631960899002321
{'avg': 1.0312461568821905, 'unif': 0.8084070646708165, 'worst': 1.2631960899002321, 'statistics': {'employment': {'N': 647222, 'error_rate': 0.17277842842177799, 'group_statistics': {1: {'group_count': 497326, 'group_errors': 85345, 'group_frequency': 0.7684009505239315, 'group_error_rate': 0.1716077582913421}, 2: {'group_count': 62247, 'group_errors': 10839, 'group_frequency': 0.0961756553392808, 'group_error_rate': 0.1741288736806593}, 3: {'group_count': 5688, 'group_errors': 1201, 'group_frequency': 0.008788329197709596, 'group_error_rate': 0.21114627285513363}, 4: {'group_count': 409, 'group_errors': 92, 'group_frequency': 0.0006319315474443082, 'group_error_rate': 0.22493887530562348}, 5: {'group_count': 884, 'group_errors': 172, 'group_frequency': 0.0013658373788282847, 'group_error_rate': 0.19457013574660634}, 6: {'group_count': 34768, 'group_errors': 6719, 'group_frequency': 0.05371881672749072, 'group_error_rate': 0.19325241601472617}, 7: {'group_count': 1114, 'group_errors': 206, 'group_frequency': 0.0017212023077089469, 'group_error_rate': 0.18491921005385997}, 8: {'group_count': 24581, 'group_errors': 4424, 'group_frequency': 0.03797924050789374, 'group_error_rate': 0.17997640454009195}, 9: {'group_count': 20205, 'group_errors': 2828, 'group_frequency': 0.031218036469712093, 'group_error_rate': 0.13996535511012126}}}, 'income-poverty': {'N': 647222, 'error_rate': 0.23076316936074484, 'group_statistics': {1: {'group_count': 497326, 'group_errors': 111050, 'group_frequency': 0.7684009505239315, 'group_error_rate': 0.2232941772599864}, 2: {'group_count': 62247, 'group_errors': 15428, 'group_frequency': 0.0961756553392808, 'group_error_rate': 0.24785130207078251}, 3: {'group_count': 5688, 'group_errors': 1560, 'group_frequency': 0.008788329197709596, 'group_error_rate': 0.2742616033755274}, 4: {'group_count': 409, 'group_errors': 129, 'group_frequency': 0.0006319315474443082, 'group_error_rate': 0.3154034229828851}, 5: {'group_count': 884, 'group_errors': 244, 'group_frequency': 0.0013658373788282847, 'group_error_rate': 0.27601809954751133}, 6: {'group_count': 34768, 'group_errors': 8205, 'group_frequency': 0.05371881672749072, 'group_error_rate': 0.23599286700414174}, 7: {'group_count': 1114, 'group_errors': 304, 'group_frequency': 0.0017212023077089469, 'group_error_rate': 0.27289048473967686}, 8: {'group_count': 24581, 'group_errors': 7239, 'group_frequency': 0.03797924050789374, 'group_error_rate': 0.2944957487490338}, 9: {'group_count': 20205, 'group_errors': 5196, 'group_frequency': 0.031218036469712093, 'group_error_rate': 0.2571640682999258}}}, 'health-insurance': {'N': 647222, 'error_rate': 0.15040743361628622, 'group_statistics': {1: {'group_count': 497326, 'group_errors': 80304, 'group_frequency': 0.7684009505239315, 'group_error_rate': 0.16147154984859027}, 2: {'group_count': 62247, 'group_errors': 6515, 'group_frequency': 0.0961756553392808, 'group_error_rate': 0.10466367857085482}, 3: {'group_count': 5688, 'group_errors': 391, 'group_frequency': 0.008788329197709596, 'group_error_rate': 0.06874120956399438}, 4: {'group_count': 409, 'group_errors': 14, 'group_frequency': 0.0006319315474443082, 'group_error_rate': 0.034229828850855744}, 5: {'group_count': 884, 'group_errors': 97, 'group_frequency': 0.0013658373788282847, 'group_error_rate': 0.10972850678733032}, 6: {'group_count': 34768, 'group_errors': 5775, 'group_frequency': 0.05371881672749072, 'group_error_rate': 0.1661010124252186}, 7: {'group_count': 1114, 'group_errors': 108, 'group_frequency': 0.0017212023077089469, 'group_error_rate': 0.09694793536804308}, 8: {'group_count': 24581, 'group_errors': 2072, 'group_frequency': 0.03797924050789374, 'group_error_rate': 0.08429274643016964}, 9: {'group_count': 20205, 'group_errors': 2071, 'group_frequency': 0.031218036469712093, 'group_error_rate': 0.10249938134125217}}}}}

---

Applications: ['employment', 'income-poverty', 'health-insurance'], ML method: gbm, grouping function: individual, seed: 4.
Average: 1.2320033866835258, Uniform: 1.2320033866790256, Worst: 166.051581826983

Applications: ['employment', 'income-poverty', 'health-insurance'], ML method: gbm, grouping function: race, seed: 4.
Average: 1.0312505811832082, Uniform: 0.7788597464287231, Worst: 1.2774219625847085
{'avg': 1.0312505811832082, 'unif': 0.7788597464287231, 'worst': 1.2774219625847085, 'statistics': {'employment': {'N': 647222, 'error_rate': 0.17264246270985845, 'group_statistics': {1: {'group_count': 497444, 'group_errors': 85208, 'group_frequency': 0.7685832681830964, 'group_error_rate': 0.17129164287839435}, 2: {'group_count': 62129, 'group_errors': 10872, 'group_frequency': 0.09599333768011595, 'group_error_rate': 0.17499074506269213}, 3: {'group_count': 5845, 'group_errors': 1249, 'group_frequency': 0.009030904388293352, 'group_error_rate': 0.2136869118905047}, 4: {'group_count': 382, 'group_errors': 90, 'group_frequency': 0.0005902147949235347, 'group_error_rate': 0.2356020942408377}, 5: {'group_count': 933, 'group_errors': 174, 'group_frequency': 0.0014415455593289473, 'group_error_rate': 0.1864951768488746}, 6: {'group_count': 34751, 'group_errors': 6720, 'group_frequency': 0.05369255062405172, 'group_error_rate': 0.19337573019481455}, 7: {'group_count': 1063, 'group_errors': 188, 'group_frequency': 0.0016424039973919305, 'group_error_rate': 0.17685794920037629}, 8: {'group_count': 24651, 'group_errors': 4418, 'group_frequency': 0.03808739505146611, 'group_error_rate': 0.17922193825808283}, 9: {'group_count': 20024, 'group_errors': 2819, 'group_frequency': 0.030938379721332093, 'group_error_rate': 0.14078106272473032}}}, 'income-poverty': {'N': 647222, 'error_rate': 0.23056385598759005, 'group_statistics': {1: {'group_count': 497444, 'group_errors': 111247, 'group_frequency': 0.7685832681830964, 'group_error_rate': 0.22363723353784545}, 2: {'group_count': 62129, 'group_errors': 15285, 'group_frequency': 0.09599333768011595, 'group_error_rate': 0.24602037695762044}, 3: {'group_count': 5845, 'group_errors': 1581, 'group_frequency': 0.009030904388293352, 'group_error_rate': 0.27048759623609925}, 4: {'group_count': 382, 'group_errors': 99, 'group_frequency': 0.0005902147949235347, 'group_error_rate': 0.2591623036649215}, 5: {'group_count': 933, 'group_errors': 250, 'group_frequency': 0.0014415455593289473, 'group_error_rate': 0.2679528403001072}, 6: {'group_count': 34751, 'group_errors': 8118, 'group_frequency': 0.05369255062405172, 'group_error_rate': 0.23360478835141435}, 7: {'group_count': 1063, 'group_errors': 302, 'group_frequency': 0.0016424039973919305, 'group_error_rate': 0.28410159924741296}, 8: {'group_count': 24651, 'group_errors': 7104, 'group_frequency': 0.03808739505146611, 'group_error_rate': 0.288183035170987}, 9: {'group_count': 20024, 'group_errors': 5240, 'group_frequency': 0.030938379721332093, 'group_error_rate': 0.26168597682780664}}}, 'health-insurance': {'N': 647222, 'error_rate': 0.15129275580867152, 'group_statistics': {1: {'group_count': 497444, 'group_errors': 80689, 'group_frequency': 0.7685832681830964, 'group_error_rate': 0.16220720322287535}, 2: {'group_count': 62129, 'group_errors': 6426, 'group_frequency': 0.09599333768011595, 'group_error_rate': 0.10342996024400844}, 3: {'group_count': 5845, 'group_errors': 424, 'group_frequency': 0.009030904388293352, 'group_error_rate': 0.07254063301967494}, 4: {'group_count': 382, 'group_errors': 8, 'group_frequency': 0.0005902147949235347, 'group_error_rate': 0.020942408376963352}, 5: {'group_count': 933, 'group_errors': 94, 'group_frequency': 0.0014415455593289473, 'group_error_rate': 0.1007502679528403}, 6: {'group_count': 34751, 'group_errors': 5918, 'group_frequency': 0.05369255062405172, 'group_error_rate': 0.17029725763287387}, 7: {'group_count': 1063, 'group_errors': 105, 'group_frequency': 0.0016424039973919305, 'group_error_rate': 0.09877704609595485}, 8: {'group_count': 24651, 'group_errors': 2174, 'group_frequency': 0.03808739505146611, 'group_error_rate': 0.08819114843211229}, 9: {'group_count': 20024, 'group_errors': 2082, 'group_frequency': 0.030938379721332093, 'group_error_rate': 0.1039752297243308}}}}}

---
---

Applications: ['employment', 'income-poverty', 'health-insurance'], ML method: logistic, grouping function: individual, seed: 0.
Average: 1.2392425150962545, Uniform: 1.2392425150916004, Worst: 101.59151603579683

Applications: ['employment', 'income-poverty', 'health-insurance'], ML method: logistic, grouping function: race, seed: 0.
Average: 1.0122858854001036, Uniform: 0.7821570094310824, Worst: 1.1981154533047589
{'avg': 1.0122858854001036, 'unif': 0.7821570094310824, 'worst': 1.1981154533047589, 'statistics': {'employment': {'N': 647222, 'error_rate': 0.22169363834974706, 'group_statistics': {1: {'group_count': 496856, 'group_errors': 108737, 'group_frequency': 0.7676747700170884, 'group_error_rate': 0.21885012961501923}, 2: {'group_count': 62327, 'group_errors': 14629, 'group_frequency': 0.09629926053193495, 'group_error_rate': 0.23471368748696392}, 3: {'group_count': 5758, 'group_errors': 1406, 'group_frequency': 0.008896483741281972, 'group_error_rate': 0.24418200764154221}, 4: {'group_count': 432, 'group_errors': 116, 'group_frequency': 0.0006674680403323743, 'group_error_rate': 0.26851851851851855}, 5: {'group_count': 926, 'group_errors': 222, 'group_frequency': 0.0014307301049717098, 'group_error_rate': 0.23974082073434125}, 6: {'group_count': 34789, 'group_errors': 8591, 'group_frequency': 0.05375126309056243, 'group_error_rate': 0.24694587369570842}, 7: {'group_count': 1127, 'group_errors': 297, 'group_frequency': 0.0017412881515152451, 'group_error_rate': 0.26353149955634425}, 8: {'group_count': 24559, 'group_errors': 5868, 'group_frequency': 0.03794524907991385, 'group_error_rate': 0.23893481004926911}, 9: {'group_count': 20448, 'group_errors': 3619, 'group_frequency': 0.031593487242399056, 'group_error_rate': 0.176985524256651}}}, 'income-poverty': {'N': 647222, 'error_rate': 0.2945851655228036, 'group_statistics': {1: {'group_count': 496856, 'group_errors': 139741, 'group_frequency': 0.7676747700170884, 'group_error_rate': 0.28125050316389455}, 2: {'group_count': 62327, 'group_errors': 21579, 'group_frequency': 0.09629926053193495, 'group_error_rate': 0.34622234344666036}, 3: {'group_count': 5758, 'group_errors': 2321, 'group_frequency': 0.008896483741281972, 'group_error_rate': 0.40309135116359845}, 4: {'group_count': 432, 'group_errors': 183, 'group_frequency': 0.0006674680403323743, 'group_error_rate': 0.4236111111111111}, 5: {'group_count': 926, 'group_errors': 358, 'group_frequency': 0.0014307301049717098, 'group_error_rate': 0.38660907127429806}, 6: {'group_count': 34789, 'group_errors': 9887, 'group_frequency': 0.05375126309056243, 'group_error_rate': 0.28419902842852623}, 7: {'group_count': 1127, 'group_errors': 388, 'group_frequency': 0.0017412881515152451, 'group_error_rate': 0.3442768411712511}, 8: {'group_count': 24559, 'group_errors': 9571, 'group_frequency': 0.03794524907991385, 'group_error_rate': 0.38971456492528195}, 9: {'group_count': 20448, 'group_errors': 6634, 'group_frequency': 0.031593487242399056, 'group_error_rate': 0.32443270735524254}}}, 'health-insurance': {'N': 647222, 'error_rate': 0.15072262685755428, 'group_statistics': {1: {'group_count': 496856, 'group_errors': 80456, 'group_frequency': 0.7676747700170884, 'group_error_rate': 0.16193021720579}, 2: {'group_count': 62327, 'group_errors': 6517, 'group_frequency': 0.09629926053193495, 'group_error_rate': 0.10456142602724341}, 3: {'group_count': 5758, 'group_errors': 405, 'group_frequency': 0.008896483741281972, 'group_error_rate': 0.0703369225425495}, 4: {'group_count': 432, 'group_errors': 12, 'group_frequency': 0.0006674680403323743, 'group_error_rate': 0.027777777777777776}, 5: {'group_count': 926, 'group_errors': 75, 'group_frequency': 0.0014307301049717098, 'group_error_rate': 0.08099352051835854}, 6: {'group_count': 34789, 'group_errors': 5846, 'group_frequency': 0.05375126309056243, 'group_error_rate': 0.16804162235189285}, 7: {'group_count': 1127, 'group_errors': 96, 'group_frequency': 0.0017412881515152451, 'group_error_rate': 0.08518189884649512}, 8: {'group_count': 24559, 'group_errors': 2114, 'group_frequency': 0.03794524907991385, 'group_error_rate': 0.08607842338857445}, 9: {'group_count': 20448, 'group_errors': 2030, 'group_frequency': 0.031593487242399056, 'group_error_rate': 0.09927621283255086}}}}}

---

Applications: ['employment', 'income-poverty', 'health-insurance'], ML method: logistic, grouping function: individual, seed: 1.
Average: 1.2426807134106341, Uniform: 1.2426807134059688, Worst: 102.7321875963773

Applications: ['employment', 'income-poverty', 'health-insurance'], ML method: logistic, grouping function: race, seed: 1.
Average: 1.0126976352208217, Uniform: 0.7887385017065662, Worst: 1.162527765002424
{'avg': 1.0126976352208217, 'unif': 0.7887385017065662, 'worst': 1.162527765002424, 'statistics': {'employment': {'N': 647222, 'error_rate': 0.22102153511469017, 'group_statistics': {1: {'group_count': 497396, 'group_errors': 108560, 'group_frequency': 0.7685091050675039, 'group_error_rate': 0.21825668079357294}, 2: {'group_count': 62140, 'group_errors': 14525, 'group_frequency': 0.09601033339410589, 'group_error_rate': 0.23374637914386867}, 3: {'group_count': 5623, 'group_errors': 1380, 'group_frequency': 0.008687899978678104, 'group_error_rate': 0.24542059398897387}, 4: {'group_count': 432, 'group_errors': 117, 'group_frequency': 0.0006674680403323743, 'group_error_rate': 0.2708333333333333}, 5: {'group_count': 928, 'group_errors': 208, 'group_frequency': 0.0014338202347880635, 'group_error_rate': 0.22413793103448276}, 6: {'group_count': 34728, 'group_errors': 8505, 'group_frequency': 0.05365701413116365, 'group_error_rate': 0.24490324809951625}, 7: {'group_count': 1123, 'group_errors': 269, 'group_frequency': 0.001735107891882538, 'group_error_rate': 0.23953695458593055}, 8: {'group_count': 24569, 'group_errors': 5937, 'group_frequency': 0.037960699728995614, 'group_error_rate': 0.24164597663722578}, 9: {'group_count': 20283, 'group_errors': 3549, 'group_frequency': 0.031338551532549885, 'group_error_rate': 0.17497411625499187}}}, 'income-poverty': {'N': 647222, 'error_rate': 0.29321005775452624, 'group_statistics': {1: {'group_count': 497396, 'group_errors': 139561, 'group_frequency': 0.7685091050675039, 'group_error_rate': 0.2805832777103153}, 2: {'group_count': 62140, 'group_errors': 21523, 'group_frequency': 0.09601033339410589, 'group_error_rate': 0.3463630511747667}, 3: {'group_count': 5623, 'group_errors': 2178, 'group_frequency': 0.008687899978678104, 'group_error_rate': 0.38733772007825007}, 4: {'group_count': 432, 'group_errors': 162, 'group_frequency': 0.0006674680403323743, 'group_error_rate': 0.375}, 5: {'group_count': 928, 'group_errors': 344, 'group_frequency': 0.0014338202347880635, 'group_error_rate': 0.3706896551724138}, 6: {'group_count': 34728, 'group_errors': 9722, 'group_frequency': 0.05365701413116365, 'group_error_rate': 0.2799470168164018}, 7: {'group_count': 1123, 'group_errors': 392, 'group_frequency': 0.001735107891882538, 'group_error_rate': 0.3490650044523598}, 8: {'group_count': 24569, 'group_errors': 9338, 'group_frequency': 0.037960699728995614, 'group_error_rate': 0.3800724490211242}, 9: {'group_count': 20283, 'group_errors': 6552, 'group_frequency': 0.031338551532549885, 'group_error_rate': 0.3230291377015234}}}, 'health-insurance': {'N': 647222, 'error_rate': 0.1502034850484069, 'group_statistics': {1: {'group_count': 497396, 'group_errors': 80088, 'group_frequency': 0.7685091050675039, 'group_error_rate': 0.1610145638485231}, 2: {'group_count': 62140, 'group_errors': 6480, 'group_frequency': 0.09601033339410589, 'group_error_rate': 0.10428065658191181}, 3: {'group_count': 5623, 'group_errors': 397, 'group_frequency': 0.008687899978678104, 'group_error_rate': 0.07060288102436423}, 4: {'group_count': 432, 'group_errors': 17, 'group_frequency': 0.0006674680403323743, 'group_error_rate': 0.03935185185185185}, 5: {'group_count': 928, 'group_errors': 82, 'group_frequency': 0.0014338202347880635, 'group_error_rate': 0.08836206896551724}, 6: {'group_count': 34728, 'group_errors': 5732, 'group_frequency': 0.05365701413116365, 'group_error_rate': 0.16505413499193733}, 7: {'group_count': 1123, 'group_errors': 99, 'group_frequency': 0.001735107891882538, 'group_error_rate': 0.0881567230632235}, 8: {'group_count': 24569, 'group_errors': 2123, 'group_frequency': 0.037960699728995614, 'group_error_rate': 0.08640970328462697}, 9: {'group_count': 20283, 'group_errors': 2197, 'group_frequency': 0.031338551532549885, 'group_error_rate': 0.10831731006261401}}}}}

---

Applications: ['employment', 'income-poverty', 'health-insurance'], ML method: logistic, grouping function: individual, seed: 2.
Average: 1.2311656317000508, Uniform: 1.2311656316954298, Worst: 102.4081072454928

Applications: ['employment', 'income-poverty', 'health-insurance'], ML method: logistic, grouping function: race, seed: 2.
Average: 1.0156470441786185, Uniform: 0.7739654922681486, Worst: 1.2111446614416803
{'avg': 1.0156470441786185, 'unif': 0.7739654922681486, 'worst': 1.2111446614416803, 'statistics': {'employment': {'N': 647222, 'error_rate': 0.22051938901953272, 'group_statistics': {1: {'group_count': 497396, 'group_errors': 108267, 'group_frequency': 0.7685091050675039, 'group_error_rate': 0.2176676129281297}, 2: {'group_count': 62014, 'group_errors': 14414, 'group_frequency': 0.09581565521567562, 'group_error_rate': 0.2324313864611217}, 3: {'group_count': 5659, 'group_errors': 1407, 'group_frequency': 0.00874352231537247, 'group_error_rate': 0.24863050008835483}, 4: {'group_count': 404, 'group_errors': 97, 'group_frequency': 0.0006242062229034242, 'group_error_rate': 0.2400990099009901}, 5: {'group_count': 909, 'group_errors': 224, 'group_frequency': 0.0014044640015327043, 'group_error_rate': 0.24642464246424642}, 6: {'group_count': 34715, 'group_errors': 8624, 'group_frequency': 0.053636928287357354, 'group_error_rate': 0.24842287195736712}, 7: {'group_count': 1074, 'group_errors': 252, 'group_frequency': 0.001659399711381875, 'group_error_rate': 0.2346368715083799}, 8: {'group_count': 24612, 'group_errors': 5865, 'group_frequency': 0.038027137520047216, 'group_error_rate': 0.23829839102876646}, 9: {'group_count': 20439, 'group_errors': 3575, 'group_frequency': 0.03157958165822546, 'group_error_rate': 0.17491070991731494}}}, 'income-poverty': {'N': 647222, 'error_rate': 0.2945774401982627, 'group_statistics': {1: {'group_count': 497396, 'group_errors': 140350, 'group_frequency': 0.7685091050675039, 'group_error_rate': 0.28216953895889796}, 2: {'group_count': 62014, 'group_errors': 21503, 'group_frequency': 0.09581565521567562, 'group_error_rate': 0.34674428354887604}, 3: {'group_count': 5659, 'group_errors': 2255, 'group_frequency': 0.00874352231537247, 'group_error_rate': 0.3984802968722389}, 4: {'group_count': 404, 'group_errors': 179, 'group_frequency': 0.0006242062229034242, 'group_error_rate': 0.4430693069306931}, 5: {'group_count': 909, 'group_errors': 318, 'group_frequency': 0.0014044640015327043, 'group_error_rate': 0.34983498349834985}, 6: {'group_count': 34715, 'group_errors': 9711, 'group_frequency': 0.053636928287357354, 'group_error_rate': 0.2797349848768544}, 7: {'group_count': 1074, 'group_errors': 373, 'group_frequency': 0.001659399711381875, 'group_error_rate': 0.3472998137802607}, 8: {'group_count': 24612, 'group_errors': 9399, 'group_frequency': 0.038027137520047216, 'group_error_rate': 0.3818868844466114}, 9: {'group_count': 20439, 'group_errors': 6569, 'group_frequency': 0.03157958165822546, 'group_error_rate': 0.32139537159352216}}}, 'health-insurance': {'N': 647222, 'error_rate': 0.15032090998142833, 'group_statistics': {1: {'group_count': 497396, 'group_errors': 80342, 'group_frequency': 0.7685091050675039, 'group_error_rate': 0.16152522336327593}, 2: {'group_count': 62014, 'group_errors': 6369, 'group_frequency': 0.09581565521567562, 'group_error_rate': 0.1027026155384268}, 3: {'group_count': 5659, 'group_errors': 383, 'group_frequency': 0.00874352231537247, 'group_error_rate': 0.06767980208517406}, 4: {'group_count': 404, 'group_errors': 17, 'group_frequency': 0.0006242062229034242, 'group_error_rate': 0.04207920792079208}, 5: {'group_count': 909, 'group_errors': 69, 'group_frequency': 0.0014044640015327043, 'group_error_rate': 0.07590759075907591}, 6: {'group_count': 34715, 'group_errors': 5908, 'group_frequency': 0.053636928287357354, 'group_error_rate': 0.17018579864611838}, 7: {'group_count': 1074, 'group_errors': 92, 'group_frequency': 0.001659399711381875, 'group_error_rate': 0.0856610800744879}, 8: {'group_count': 24612, 'group_errors': 2092, 'group_frequency': 0.038027137520047216, 'group_error_rate': 0.08499918738826588}, 9: {'group_count': 20439, 'group_errors': 2019, 'group_frequency': 0.03157958165822546, 'group_error_rate': 0.09878174078966681}}}}}

---

Applications: ['employment', 'income-poverty', 'health-insurance'], ML method: logistic, grouping function: individual, seed: 3.
Average: 1.2180626647132777, Uniform: 1.2180626647087078, Worst: 102.35743365075297

Applications: ['employment', 'income-poverty', 'health-insurance'], ML method: logistic, grouping function: race, seed: 3.
Average: 1.0117299752712496, Uniform: 0.8138903216306828, Worst: 1.2060478664507905
{'avg': 1.0117299752712496, 'unif': 0.8138903216306828, 'worst': 1.2060478664507905, 'statistics': {'employment': {'N': 647222, 'error_rate': 0.22113741498280343, 'group_statistics': {1: {'group_count': 497326, 'group_errors': 108641, 'group_frequency': 0.7684009505239315, 'group_error_rate': 0.21845027205494988}, 2: {'group_count': 62247, 'group_errors': 14386, 'group_frequency': 0.0961756553392808, 'group_error_rate': 0.23111153951194435}, 3: {'group_count': 5688, 'group_errors': 1425, 'group_frequency': 0.008788329197709596, 'group_error_rate': 0.2505274261603376}, 4: {'group_count': 409, 'group_errors': 101, 'group_frequency': 0.0006319315474443082, 'group_error_rate': 0.2469437652811736}, 5: {'group_count': 884, 'group_errors': 216, 'group_frequency': 0.0013658373788282847, 'group_error_rate': 0.24434389140271492}, 6: {'group_count': 34768, 'group_errors': 8712, 'group_frequency': 0.05371881672749072, 'group_error_rate': 0.2505752416014726}, 7: {'group_count': 1114, 'group_errors': 268, 'group_frequency': 0.0017212023077089469, 'group_error_rate': 0.24057450628366248}, 8: {'group_count': 24581, 'group_errors': 5857, 'group_frequency': 0.03797924050789374, 'group_error_rate': 0.23827346324396892}, 9: {'group_count': 20205, 'group_errors': 3519, 'group_frequency': 0.031218036469712093, 'group_error_rate': 0.17416481069042317}}}, 'income-poverty': {'N': 647222, 'error_rate': 0.2936581265778975, 'group_statistics': {1: {'group_count': 497326, 'group_errors': 139364, 'group_frequency': 0.7684009505239315, 'group_error_rate': 0.2802266521356213}, 2: {'group_count': 62247, 'group_errors': 21674, 'group_frequency': 0.0961756553392808, 'group_error_rate': 0.3481934872363327}, 3: {'group_count': 5688, 'group_errors': 2296, 'group_frequency': 0.008788329197709596, 'group_error_rate': 0.40365682137834036}, 4: {'group_count': 409, 'group_errors': 180, 'group_frequency': 0.0006319315474443082, 'group_error_rate': 0.4400977995110024}, 5: {'group_count': 884, 'group_errors': 320, 'group_frequency': 0.0013658373788282847, 'group_error_rate': 0.36199095022624433}, 6: {'group_count': 34768, 'group_errors': 9841, 'group_frequency': 0.05371881672749072, 'group_error_rate': 0.2830476300046019}, 7: {'group_count': 1114, 'group_errors': 361, 'group_frequency': 0.0017212023077089469, 'group_error_rate': 0.3240574506283663}, 8: {'group_count': 24581, 'group_errors': 9514, 'group_frequency': 0.03797924050789374, 'group_error_rate': 0.38704690614702414}, 9: {'group_count': 20205, 'group_errors': 6512, 'group_frequency': 0.031218036469712093, 'group_error_rate': 0.3222964612719624}}}, 'health-insurance': {'N': 647222, 'error_rate': 0.15044451517408247, 'group_statistics': {1: {'group_count': 497326, 'group_errors': 80324, 'group_frequency': 0.7684009505239315, 'group_error_rate': 0.16151176491878566}, 2: {'group_count': 62247, 'group_errors': 6515, 'group_frequency': 0.0961756553392808, 'group_error_rate': 0.10466367857085482}, 3: {'group_count': 5688, 'group_errors': 391, 'group_frequency': 0.008788329197709596, 'group_error_rate': 0.06874120956399438}, 4: {'group_count': 409, 'group_errors': 14, 'group_frequency': 0.0006319315474443082, 'group_error_rate': 0.034229828850855744}, 5: {'group_count': 884, 'group_errors': 97, 'group_frequency': 0.0013658373788282847, 'group_error_rate': 0.10972850678733032}, 6: {'group_count': 34768, 'group_errors': 5776, 'group_frequency': 0.05371881672749072, 'group_error_rate': 0.16612977450529223}, 7: {'group_count': 1114, 'group_errors': 108, 'group_frequency': 0.0017212023077089469, 'group_error_rate': 0.09694793536804308}, 8: {'group_count': 24581, 'group_errors': 2072, 'group_frequency': 0.03797924050789374, 'group_error_rate': 0.08429274643016964}, 9: {'group_count': 20205, 'group_errors': 2074, 'group_frequency': 0.031218036469712093, 'group_error_rate': 0.10264785944073249}}}}}

---

Applications: ['employment', 'income-poverty', 'health-insurance'], ML method: logistic, grouping function: individual, seed: 4.
Average: 1.238562913874225, Uniform: 1.2385629138695735, Worst: 101.47154003044216

Applications: ['employment', 'income-poverty', 'health-insurance'], ML method: logistic, grouping function: race, seed: 4.
Average: 1.0139886591023697, Uniform: 0.8073701257148559, Worst: 1.202286560756401
{'avg': 1.0139886591023697, 'unif': 0.8073701257148559, 'worst': 1.202286560756401, 'statistics': {'employment': {'N': 647222, 'error_rate': 0.22128419614908024, 'group_statistics': {1: {'group_count': 497444, 'group_errors': 108970, 'group_frequency': 0.7685832681830964, 'group_error_rate': 0.21905983387074726}, 2: {'group_count': 62129, 'group_errors': 14298, 'group_frequency': 0.09599333768011595, 'group_error_rate': 0.2301340758743904}, 3: {'group_count': 5845, 'group_errors': 1442, 'group_frequency': 0.009030904388293352, 'group_error_rate': 0.2467065868263473}, 4: {'group_count': 382, 'group_errors': 108, 'group_frequency': 0.0005902147949235347, 'group_error_rate': 0.28272251308900526}, 5: {'group_count': 933, 'group_errors': 241, 'group_frequency': 0.0014415455593289473, 'group_error_rate': 0.2583065380493033}, 6: {'group_count': 34751, 'group_errors': 8518, 'group_frequency': 0.05369255062405172, 'group_error_rate': 0.24511524848205807}, 7: {'group_count': 1063, 'group_errors': 248, 'group_frequency': 0.0016424039973919305, 'group_error_rate': 0.2333019755409219}, 8: {'group_count': 24651, 'group_errors': 5841, 'group_frequency': 0.03808739505146611, 'group_error_rate': 0.23694779116465864}, 9: {'group_count': 20024, 'group_errors': 3554, 'group_frequency': 0.030938379721332093, 'group_error_rate': 0.17748701558130245}}}, 'income-poverty': {'N': 647222, 'error_rate': 0.2942545216324538, 'group_statistics': {1: {'group_count': 497444, 'group_errors': 139877, 'group_frequency': 0.7685832681830964, 'group_error_rate': 0.28119145069595775}, 2: {'group_count': 62129, 'group_errors': 21605, 'group_frequency': 0.09599333768011595, 'group_error_rate': 0.3477442096283539}, 3: {'group_count': 5845, 'group_errors': 2295, 'group_frequency': 0.009030904388293352, 'group_error_rate': 0.39264328485885375}, 4: {'group_count': 382, 'group_errors': 140, 'group_frequency': 0.0005902147949235347, 'group_error_rate': 0.36649214659685864}, 5: {'group_count': 933, 'group_errors': 351, 'group_frequency': 0.0014415455593289473, 'group_error_rate': 0.3762057877813505}, 6: {'group_count': 34751, 'group_errors': 9864, 'group_frequency': 0.05369255062405172, 'group_error_rate': 0.2838479468216742}, 7: {'group_count': 1063, 'group_errors': 393, 'group_frequency': 0.0016424039973919305, 'group_error_rate': 0.36970837253057387}, 8: {'group_count': 24651, 'group_errors': 9433, 'group_frequency': 0.03808739505146611, 'group_error_rate': 0.382661960975214}, 9: {'group_count': 20024, 'group_errors': 6490, 'group_frequency': 0.030938379721332093, 'group_error_rate': 0.32411106671993606}}}, 'health-insurance': {'N': 647222, 'error_rate': 0.15134992321027407, 'group_statistics': {1: {'group_count': 497444, 'group_errors': 80725, 'group_frequency': 0.7685832681830964, 'group_error_rate': 0.1622795731780864}, 2: {'group_count': 62129, 'group_errors': 6426, 'group_frequency': 0.09599333768011595, 'group_error_rate': 0.10342996024400844}, 3: {'group_count': 5845, 'group_errors': 424, 'group_frequency': 0.009030904388293352, 'group_error_rate': 0.07254063301967494}, 4: {'group_count': 382, 'group_errors': 8, 'group_frequency': 0.0005902147949235347, 'group_error_rate': 0.020942408376963352}, 5: {'group_count': 933, 'group_errors': 94, 'group_frequency': 0.0014415455593289473, 'group_error_rate': 0.1007502679528403}, 6: {'group_count': 34751, 'group_errors': 5918, 'group_frequency': 0.05369255062405172, 'group_error_rate': 0.17029725763287387}, 7: {'group_count': 1063, 'group_errors': 105, 'group_frequency': 0.0016424039973919305, 'group_error_rate': 0.09877704609595485}, 8: {'group_count': 24651, 'group_errors': 2174, 'group_frequency': 0.03808739505146611, 'group_error_rate': 0.08819114843211229}, 9: {'group_count': 20024, 'group_errors': 2083, 'group_frequency': 0.030938379721332093, 'group_error_rate': 0.1040251697962445}}}}}
