# Supplementary material
Source: ML conference proceedings conference paper supplement (https://proceedings.neurips.cc/paper_files/paper/2022/hash/17a234c91f746d9625a75cf8a8731ee2-Abstract.html)
Supplement: Supplementary file 1 [file 17a234c91f746d9625a75cf8a8731ee2-Supplemental-Conference.zip › NeurIPS_2022_supplement/code/Homogenization-main/src/cv_experiments.out]

('probing', 'individual', 0)
{'avg': {'mean': 0.0, 'stdev': 0.0, 'seeds': 5}, 'unif': {'mean': 0.0, 'stdev': 0.0, 'seeds': 5}, 'worst': {'mean': 0.0, 'stdev': 0.0, 'seeds': 5}, 'error': {'mean': 2.1308608263140165e-06, 'stdev': 5.177902670114721e-07, 'seeds': 5}, 'Eyeglasses': {'mean': 0.0034766055505460374, 'stdev': 0.00015682272159601768, 'seeds': 5}, 'Wearing_Earrings': {'mean': 0.1187055405270013, 'stdev': 0.0052533820399812805, 'seeds': 5}, 'Wearing_Necktie': {'mean': 0.03564773068830778, 'stdev': 0.0006964851734872083, 'seeds': 5}, 'Wearing_Necklace': {'mean': 0.14415389239555154, 'stdev': 0.028833739088770797, 'seeds': 5}}
('probing', 'individual', 1)
{'avg': {'mean': 0.0, 'stdev': 0.0, 'seeds': 5}, 'unif': {'mean': 0.0, 'stdev': 0.0, 'seeds': 5}, 'worst': {'mean': 0.0, 'stdev': 0.0, 'seeds': 5}, 'error': {'mean': 1.9374620840258165e-06, 'stdev': 9.510764624397586e-08, 'seeds': 5}, 'Eyeglasses': {'mean': 0.0033563771165213904, 'stdev': 7.084528415855601e-05, 'seeds': 5}, 'Wearing_Earrings': {'mean': 0.12036870053100891, 'stdev': 0.007725986007182006, 'seeds': 5}, 'Wearing_Necktie': {'mean': 0.035838092375513476, 'stdev': 0.0010475763551948396, 'seeds': 5}, 'Wearing_Necklace': {'mean': 0.13402464682897505, 'stdev': 0.0043108933363789105, 'seeds': 5}}
('probing', 'individual', 2)
{'avg': {'mean': 0.0, 'stdev': 0.0, 'seeds': 5}, 'unif': {'mean': 0.0, 'stdev': 0.0, 'seeds': 5}, 'worst': {'mean': 0.0, 'stdev': 0.0, 'seeds': 5}, 'error': {'mean': 1.7666522501011291e-06, 'stdev': 6.709374402153605e-08, 'seeds': 5}, 'Eyeglasses': {'mean': 0.003436529405871155, 'stdev': 0.00010387957796477166, 'seeds': 5}, 'Wearing_Earrings': {'mean': 0.11306482316401162, 'stdev': 0.0006786001995864209, 'seeds': 5}, 'Wearing_Necktie': {'mean': 0.0348261697224727, 'stdev': 0.0009755063776886539, 'seeds': 5}, 'Wearing_Necklace': {'mean': 0.1305881174231039, 'stdev': 0.00214399180717018, 'seeds': 5}}
('probing', 'individual', 3)
{'avg': {'mean': 0.0, 'stdev': 0.0, 'seeds': 5}, 'unif': {'mean': 0.0, 'stdev': 0.0, 'seeds': 5}, 'worst': {'mean': 0.0, 'stdev': 0.0, 'seeds': 5}, 'error': {'mean': 1.8275815344837492e-06, 'stdev': 1.2918362741301009e-07, 'seeds': 5}, 'Eyeglasses': {'mean': 0.003466586514377317, 'stdev': 2.2403245942288364e-05, 'seeds': 5}, 'Wearing_Earrings': {'mean': 0.11521891594028655, 'stdev': 0.0034880062489788992, 'seeds': 5}, 'Wearing_Necktie': {'mean': 0.03430517984169923, 'stdev': 0.0009116772400422676, 'seeds': 5}, 'Wearing_Necklace': {'mean': 0.13325318104398357, 'stdev': 0.00359988863304712, 'seeds': 5}}
('probing', 'individual', 4)
{'avg': {'mean': 0.0, 'stdev': 0.0, 'seeds': 5}, 'unif': {'mean': 0.0, 'stdev': 0.0, 'seeds': 5}, 'worst': {'mean': 0.0, 'stdev': 0.0, 'seeds': 5}, 'error': {'mean': 1.7919067482358267e-06, 'stdev': 1.5517198395795755e-07, 'seeds': 5}, 'Eyeglasses': {'mean': 0.003486624586714758, 'stdev': 0.0001353497253392074, 'seeds': 5}, 'Wearing_Earrings': {'mean': 0.11663160004007614, 'stdev': 0.005562640702751402, 'seeds': 5}, 'Wearing_Necktie': {'mean': 0.034245065624686905, 'stdev': 0.0006791546871087996, 'seeds': 5}, 'Wearing_Necklace': {'mean': 0.12849413886384128, 'stdev': 0.00042359319019356407, 'seeds': 5}}
('probing', 'individual', 5)
{'avg': {'mean': 0.0, 'stdev': 0.0, 'seeds': 5}, 'unif': {'mean': 0.0, 'stdev': 0.0, 'seeds': 5}, 'worst': {'mean': 0.0, 'stdev': 0.0, 'seeds': 5}, 'error': {'mean': 1.8367755482632625e-06, 'stdev': 1.195791683867885e-07, 'seeds': 5}, 'Eyeglasses': {'mean': 0.0035066626590521993, 'stdev': 7.920743563191005e-05, 'seeds': 5}, 'Wearing_Earrings': {'mean': 0.11488828774671876, 'stdev': 0.0057137720877918656, 'seeds': 5}, 'Wearing_Necktie': {'mean': 0.03520689309688408, 'stdev': 0.001127642409516325, 'seeds': 5}, 'Wearing_Necklace': {'mean': 0.12949604248071336, 'stdev': 0.00199344832692832, 'seeds': 5}}
('probing', 'individual', 6)
{'avg': {'mean': 0.0, 'stdev': 0.0, 'seeds': 5}, 'unif': {'mean': 0.0, 'stdev': 0.0, 'seeds': 5}, 'worst': {'mean': 0.0, 'stdev': 0.0, 'seeds': 5}, 'error': {'mean': 1.844681706510363e-06, 'stdev': 1.332100895816759e-07, 'seeds': 5}, 'Eyeglasses': {'mean': 0.003566776876064523, 'stdev': 6.53161246889354e-05, 'seeds': 5}, 'Wearing_Earrings': {'mean': 0.11430718364893297, 'stdev': 0.004290294714968558, 'seeds': 5}, 'Wearing_Necktie': {'mean': 0.03433523695020539, 'stdev': 0.0007845935306658337, 'seeds': 5}, 'Wearing_Necklace': {'mean': 0.13172026851016932, 'stdev': 0.005811213717293406, 'seeds': 5}}
('probing', 'individual', 7)
{'avg': {'mean': 0.0, 'stdev': 0.0, 'seeds': 5}, 'unif': {'mean': 0.0, 'stdev': 0.0, 'seeds': 5}, 'worst': {'mean': 0.0, 'stdev': 0.0, 'seeds': 5}, 'error': {'mean': 1.7300229520986713e-06, 'stdev': 3.796027439193902e-08, 'seeds': 5}, 'Eyeglasses': {'mean': 0.0035066626590521993, 'stdev': 6.135381581963675e-05, 'seeds': 5}, 'Wearing_Earrings': {'mean': 0.11213305280032061, 'stdev': 0.0007299127431541541, 'seeds': 5}, 'Wearing_Necktie': {'mean': 0.034024646828975054, 'stdev': 0.00044581896525973445, 'seeds': 5}, 'Wearing_Necklace': {'mean': 0.1293257188658451, 'stdev': 0.0021437576958125083, 'seeds': 5}}
('probing', 'individual', 8)
{'avg': {'mean': 0.0, 'stdev': 0.0, 'seeds': 5}, 'unif': {'mean': 0.0, 'stdev': 0.0, 'seeds': 5}, 'worst': {'mean': 0.0, 'stdev': 0.0, 'seeds': 5}, 'error': {'mean': 1.7024088361217378e-06, 'stdev': 2.8108324150521236e-08, 'seeds': 5}, 'Eyeglasses': {'mean': 0.0035066626590521993, 'stdev': 6.135381581963675e-05, 'seeds': 5}, 'Wearing_Earrings': {'mean': 0.11089069231539926, 'stdev': 0.000168397318043999, 'seeds': 5}, 'Wearing_Necktie': {'mean': 0.03420498948001202, 'stdev': 0.00040450113692388275, 'seeds': 5}, 'Wearing_Necklace': {'mean': 0.12800320609157398, 'stdev': 0.0006200480291259679, 'seeds': 5}}
('probing', 'individual', 9)
{'avg': {'mean': 0.0, 'stdev': 0.0, 'seeds': 5}, 'unif': {'mean': 0.0, 'stdev': 0.0, 'seeds': 5}, 'worst': {'mean': 0.0, 'stdev': 0.0, 'seeds': 5}, 'error': {'mean': 1.697964192197012e-06, 'stdev': 1.7031501476501627e-08, 'seeds': 5}, 'Eyeglasses': {'mean': 0.003536719767558361, 'stdev': 2.7438260570341864e-05, 'seeds': 5}, 'Wearing_Earrings': {'mean': 0.1109608255685803, 'stdev': 0.0002125358524756663, 'seeds': 5}, 'Wearing_Necktie': {'mean': 0.03388438032261296, 'stdev': 0.0002933884473368655, 'seeds': 5}, 'Wearing_Necklace': {'mean': 0.12769261597034365, 'stdev': 0.0002034875865303078, 'seeds': 5}}
('probing', 'hair', 0)
{'avg': {'mean': 1.0114625390848893, 'stdev': 0.024761331101778698, 'seeds': 5}, 'unif': {'mean': 0.9780878803387018, 'stdev': 0.08538295971701682, 'seeds': 5}, 'worst': {'mean': 2.7805654849839128, 'stdev': 0.4543921218881554, 'seeds': 5}, 'error': {'mean': 2.1308608263140165e-06, 'stdev': 5.177902670114721e-07, 'seeds': 5}, 'Eyeglasses': {'mean': 0.0034766055505460374, 'stdev': 0.00015682272159601768, 'seeds': 5}, 'Wearing_Earrings': {'mean': 0.1187055405270013, 'stdev': 0.0052533820399812805, 'seeds': 5}, 'Wearing_Necktie': {'mean': 0.03564773068830778, 'stdev': 0.0006964851734872083, 'seeds': 5}, 'Wearing_Necklace': {'mean': 0.14415389239555154, 'stdev': 0.028833739088770797, 'seeds': 5}}
('probing', 'hair', 1)
{'avg': {'mean': 1.033810185285409, 'stdev': 0.07366462588184926, 'seeds': 5}, 'unif': {'mean': 0.9594465721981832, 'stdev': 0.08531941204066414, 'seeds': 5}, 'worst': {'mean': 2.6734984217531355, 'stdev': 0.47714098296025004, 'seeds': 5}, 'error': {'mean': 1.9374620840258165e-06, 'stdev': 9.510764624397586e-08, 'seeds': 5}, 'Eyeglasses': {'mean': 0.0033563771165213904, 'stdev': 7.084528415855601e-05, 'seeds': 5}, 'Wearing_Earrings': {'mean': 0.12036870053100891, 'stdev': 0.007725986007182006, 'seeds': 5}, 'Wearing_Necktie': {'mean': 0.035838092375513476, 'stdev': 0.0010475763551948396, 'seeds': 5}, 'Wearing_Necklace': {'mean': 0.13402464682897505, 'stdev': 0.0043108933363789105, 'seeds': 5}}
('probing', 'hair', 2)
{'avg': {'mean': 1.060044679726827, 'stdev': 0.03525849671325781, 'seeds': 5}, 'unif': {'mean': 0.9415894728156559, 'stdev': 0.06786299864639421, 'seeds': 5}, 'worst': {'mean': 2.581197669859868, 'stdev': 0.3614902763348915, 'seeds': 5}, 'error': {'mean': 1.7666522501011291e-06, 'stdev': 6.709374402153605e-08, 'seeds': 5}, 'Eyeglasses': {'mean': 0.003436529405871155, 'stdev': 0.00010387957796477166, 'seeds': 5}, 'Wearing_Earrings': {'mean': 0.11306482316401162, 'stdev': 0.0006786001995864209, 'seeds': 5}, 'Wearing_Necktie': {'mean': 0.0348261697224727, 'stdev': 0.0009755063776886539, 'seeds': 5}, 'Wearing_Necklace': {'mean': 0.1305881174231039, 'stdev': 0.00214399180717018, 'seeds': 5}}
('probing', 'hair', 3)
{'avg': {'mean': 1.0373334616140815, 'stdev': 0.030306395253661175, 'seeds': 5}, 'unif': {'mean': 0.9553108117097726, 'stdev': 0.08202699907896054, 'seeds': 5}, 'worst': {'mean': 2.6263751412694734, 'stdev': 0.4310875135608336, 'seeds': 5}, 'error': {'mean': 1.8275815344837492e-06, 'stdev': 1.2918362741301009e-07, 'seeds': 5}, 'Eyeglasses': {'mean': 0.003466586514377317, 'stdev': 2.2403245942288364e-05, 'seeds': 5}, 'Wearing_Earrings': {'mean': 0.11521891594028655, 'stdev': 0.0034880062489788992, 'seeds': 5}, 'Wearing_Necktie': {'mean': 0.03430517984169923, 'stdev': 0.0009116772400422676, 'seeds': 5}, 'Wearing_Necklace': {'mean': 0.13325318104398357, 'stdev': 0.00359988863304712, 'seeds': 5}}
('probing', 'hair', 4)
{'avg': {'mean': 1.0682096707441018, 'stdev': 0.026922285506682825, 'seeds': 5}, 'unif': {'mean': 0.9307320456839224, 'stdev': 0.06899190694397679, 'seeds': 5}, 'worst': {'mean': 2.49159264444305, 'stdev': 0.37409843097482676, 'seeds': 5}, 'error': {'mean': 1.7919067482358267e-06, 'stdev': 1.5517198395795755e-07, 'seeds': 5}, 'Eyeglasses': {'mean': 0.003486624586714758, 'stdev': 0.0001353497253392074, 'seeds': 5}, 'Wearing_Earrings': {'mean': 0.11663160004007614, 'stdev': 0.005562640702751402, 'seeds': 5}, 'Wearing_Necktie': {'mean': 0.034245065624686905, 'stdev': 0.0006791546871087996, 'seeds': 5}, 'Wearing_Necklace': {'mean': 0.12849413886384128, 'stdev': 0.00042359319019356407, 'seeds': 5}}
('probing', 'hair', 5)
{'avg': {'mean': 1.0574383501421143, 'stdev': 0.019163260573633763, 'seeds': 5}, 'unif': {'mean': 0.9522230108372838, 'stdev': 0.02640101670744471, 'seeds': 5}, 'worst': {'mean': 2.6087764453319875, 'stdev': 0.13802809085849746, 'seeds': 5}, 'error': {'mean': 1.8367755482632625e-06, 'stdev': 1.195791683867885e-07, 'seeds': 5}, 'Eyeglasses': {'mean': 0.0035066626590521993, 'stdev': 7.920743563191005e-05, 'seeds': 5}, 'Wearing_Earrings': {'mean': 0.11488828774671876, 'stdev': 0.0057137720877918656, 'seeds': 5}, 'Wearing_Necktie': {'mean': 0.03520689309688408, 'stdev': 0.001127642409516325, 'seeds': 5}, 'Wearing_Necklace': {'mean': 0.12949604248071336, 'stdev': 0.00199344832692832, 'seeds': 5}}
('probing', 'hair', 6)
{'avg': {'mean': 1.0589510911580262, 'stdev': 0.028581451798527144, 'seeds': 5}, 'unif': {'mean': 0.9503773820843435, 'stdev': 0.07304304173571284, 'seeds': 5}, 'worst': {'mean': 2.6049834151170996, 'stdev': 0.37831678219919507, 'seeds': 5}, 'error': {'mean': 1.844681706510363e-06, 'stdev': 1.332100895816759e-07, 'seeds': 5}, 'Eyeglasses': {'mean': 0.003566776876064523, 'stdev': 6.53161246889354e-05, 'seeds': 5}, 'Wearing_Earrings': {'mean': 0.11430718364893297, 'stdev': 0.004290294714968558, 'seeds': 5}, 'Wearing_Necktie': {'mean': 0.03433523695020539, 'stdev': 0.0007845935306658337, 'seeds': 5}, 'Wearing_Necklace': {'mean': 0.13172026851016932, 'stdev': 0.005811213717293406, 'seeds': 5}}
('probing', 'hair', 7)
{'avg': {'mean': 1.0526139471547225, 'stdev': 0.01575873513251789, 'seeds': 5}, 'unif': {'mean': 0.9571799324358777, 'stdev': 0.03884620979438261, 'seeds': 5}, 'worst': {'mean': 2.6253074794609836, 'stdev': 0.19192584469613697, 'seeds': 5}, 'error': {'mean': 1.7300229520986713e-06, 'stdev': 3.796027439193902e-08, 'seeds': 5}, 'Eyeglasses': {'mean': 0.0035066626590521993, 'stdev': 6.135381581963675e-05, 'seeds': 5}, 'Wearing_Earrings': {'mean': 0.11213305280032061, 'stdev': 0.0007299127431541541, 'seeds': 5}, 'Wearing_Necktie': {'mean': 0.034024646828975054, 'stdev': 0.00044581896525973445, 'seeds': 5}, 'Wearing_Necklace': {'mean': 0.1293257188658451, 'stdev': 0.0021437576958125083, 'seeds': 5}}
('probing', 'hair', 8)
{'avg': {'mean': 1.0506386734073125, 'stdev': 0.017030795293486962, 'seeds': 5}, 'unif': {'mean': 0.9390988381333875, 'stdev': 0.06513340353684301, 'seeds': 5}, 'worst': {'mean': 2.5340497533503976, 'stdev': 0.333035175678757, 'seeds': 5}, 'error': {'mean': 1.7024088361217378e-06, 'stdev': 2.8108324150521236e-08, 'seeds': 5}, 'Eyeglasses': {'mean': 0.0035066626590521993, 'stdev': 6.135381581963675e-05, 'seeds': 5}, 'Wearing_Earrings': {'mean': 0.11089069231539926, 'stdev': 0.000168397318043999, 'seeds': 5}, 'Wearing_Necktie': {'mean': 0.03420498948001202, 'stdev': 0.00040450113692388275, 'seeds': 5}, 'Wearing_Necklace': {'mean': 0.12800320609157398, 'stdev': 0.0006200480291259679, 'seeds': 5}}
('probing', 'hair', 9)
{'avg': {'mean': 1.0483744272433801, 'stdev': 0.011644922311991919, 'seeds': 5}, 'unif': {'mean': 0.9769849986550951, 'stdev': 0.017952380360088175, 'seeds': 5}, 'worst': {'mean': 2.7388873500541147, 'stdev': 0.09861076371323733, 'seeds': 5}, 'error': {'mean': 1.697964192197012e-06, 'stdev': 1.7031501476501627e-08, 'seeds': 5}, 'Eyeglasses': {'mean': 0.003536719767558361, 'stdev': 2.7438260570341864e-05, 'seeds': 5}, 'Wearing_Earrings': {'mean': 0.1109608255685803, 'stdev': 0.0002125358524756663, 'seeds': 5}, 'Wearing_Necktie': {'mean': 0.03388438032261296, 'stdev': 0.0002933884473368655, 'seeds': 5}, 'Wearing_Necklace': {'mean': 0.12769261597034365, 'stdev': 0.0002034875865303078, 'seeds': 5}}
('probing', 'beard', 0)
{'avg': {'mean': 0.9367306656150689, 'stdev': 0.019981124616886618, 'seeds': 5}, 'unif': {'mean': 0.5284384358820341, 'stdev': 0.009041039826477793, 'seeds': 5}, 'worst': {'mean': 0.9374362063730679, 'stdev': 0.020004926746182174, 'seeds': 5}, 'error': {'mean': 2.1308608263140165e-06, 'stdev': 5.177902670114721e-07, 'seeds': 5}, 'Eyeglasses': {'mean': 0.0034766055505460374, 'stdev': 0.00015682272159601768, 'seeds': 5}, 'Wearing_Earrings': {'mean': 0.1187055405270013, 'stdev': 0.0052533820399812805, 'seeds': 5}, 'Wearing_Necktie': {'mean': 0.03564773068830778, 'stdev': 0.0006964851734872083, 'seeds': 5}, 'Wearing_Necklace': {'mean': 0.14415389239555154, 'stdev': 0.028833739088770797, 'seeds': 5}}
('probing', 'beard', 1)
{'avg': {'mean': 0.936787353924074, 'stdev': 0.014263479100785525, 'seeds': 5}, 'unif': {'mean': 0.5339663957659484, 'stdev': 0.0037189554667151022, 'seeds': 5}, 'worst': {'mean': 0.9374834401668678, 'stdev': 0.014284416148642417, 'seeds': 5}, 'error': {'mean': 1.9374620840258165e-06, 'stdev': 9.510764624397586e-08, 'seeds': 5}, 'Eyeglasses': {'mean': 0.0033563771165213904, 'stdev': 7.084528415855601e-05, 'seeds': 5}, 'Wearing_Earrings': {'mean': 0.12036870053100891, 'stdev': 0.007725986007182006, 'seeds': 5}, 'Wearing_Necktie': {'mean': 0.035838092375513476, 'stdev': 0.0010475763551948396, 'seeds': 5}, 'Wearing_Necklace': {'mean': 0.13402464682897505, 'stdev': 0.0043108933363789105, 'seeds': 5}}
('probing', 'beard', 2)
{'avg': {'mean': 0.9380287913500825, 'stdev': 0.014287245511773667, 'seeds': 5}, 'unif': {'mean': 0.5372043180204275, 'stdev': 0.00663715525870534, 'seeds': 5}, 'worst': {'mean': 0.9387214276094658, 'stdev': 0.014303531495533057, 'seeds': 5}, 'error': {'mean': 1.7666522501011291e-06, 'stdev': 6.709374402153605e-08, 'seeds': 5}, 'Eyeglasses': {'mean': 0.003436529405871155, 'stdev': 0.00010387957796477166, 'seeds': 5}, 'Wearing_Earrings': {'mean': 0.11306482316401162, 'stdev': 0.0006786001995864209, 'seeds': 5}, 'Wearing_Necktie': {'mean': 0.0348261697224727, 'stdev': 0.0009755063776886539, 'seeds': 5}, 'Wearing_Necklace': {'mean': 0.1305881174231039, 'stdev': 0.00214399180717018, 'seeds': 5}}
('probing', 'beard', 3)
{'avg': {'mean': 0.9395763598651511, 'stdev': 0.005573201035956894, 'seeds': 5}, 'unif': {'mean': 0.5404746053305801, 'stdev': 0.0041954749951434635, 'seeds': 5}, 'worst': {'mean': 0.9402660192167316, 'stdev': 0.0055825558718825856, 'seeds': 5}, 'error': {'mean': 1.8275815344837492e-06, 'stdev': 1.2918362741301009e-07, 'seeds': 5}, 'Eyeglasses': {'mean': 0.003466586514377317, 'stdev': 2.2403245942288364e-05, 'seeds': 5}, 'Wearing_Earrings': {'mean': 0.11521891594028655, 'stdev': 0.0034880062489788992, 'seeds': 5}, 'Wearing_Necktie': {'mean': 0.03430517984169923, 'stdev': 0.0009116772400422676, 'seeds': 5}, 'Wearing_Necklace': {'mean': 0.13325318104398357, 'stdev': 0.00359988863304712, 'seeds': 5}}
('probing', 'beard', 4)
{'avg': {'mean': 0.9385319402960945, 'stdev': 0.015142845831380885, 'seeds': 5}, 'unif': {'mean': 0.5404563321286089, 'stdev': 0.001847707277575545, 'seeds': 5}, 'worst': {'mean': 0.9392198264371339, 'stdev': 0.015168512273990648, 'seeds': 5}, 'error': {'mean': 1.7919067482358267e-06, 'stdev': 1.5517198395795755e-07, 'seeds': 5}, 'Eyeglasses': {'mean': 0.003486624586714758, 'stdev': 0.0001353497253392074, 'seeds': 5}, 'Wearing_Earrings': {'mean': 0.11663160004007614, 'stdev': 0.005562640702751402, 'seeds': 5}, 'Wearing_Necktie': {'mean': 0.034245065624686905, 'stdev': 0.0006791546871087996, 'seeds': 5}, 'Wearing_Necklace': {'mean': 0.12849413886384128, 'stdev': 0.00042359319019356407, 'seeds': 5}}
('probing', 'beard', 5)
{'avg': {'mean': 0.9444562380198688, 'stdev': 0.013203811950464158, 'seeds': 5}, 'unif': {'mean': 0.541394667582597, 'stdev': 0.003784781808846227, 'seeds': 5}, 'worst': {'mean': 0.9451527400476261, 'stdev': 0.01322114987604461, 'seeds': 5}, 'error': {'mean': 1.8367755482632625e-06, 'stdev': 1.195791683867885e-07, 'seeds': 5}, 'Eyeglasses': {'mean': 0.0035066626590521993, 'stdev': 7.920743563191005e-05, 'seeds': 5}, 'Wearing_Earrings': {'mean': 0.11488828774671876, 'stdev': 0.0057137720877918656, 'seeds': 5}, 'Wearing_Necktie': {'mean': 0.03520689309688408, 'stdev': 0.001127642409516325, 'seeds': 5}, 'Wearing_Necklace': {'mean': 0.12949604248071336, 'stdev': 0.00199344832692832, 'seeds': 5}}
('probing', 'beard', 6)
{'avg': {'mean': 0.9476167178183936, 'stdev': 0.00808093513193268, 'seeds': 5}, 'unif': {'mean': 0.5411218368097476, 'stdev': 0.002571129743835356, 'seeds': 5}, 'worst': {'mean': 0.9483191527059179, 'stdev': 0.008097104107117163, 'seeds': 5}, 'error': {'mean': 1.844681706510363e-06, 'stdev': 1.332100895816759e-07, 'seeds': 5}, 'Eyeglasses': {'mean': 0.003566776876064523, 'stdev': 6.53161246889354e-05, 'seeds': 5}, 'Wearing_Earrings': {'mean': 0.11430718364893297, 'stdev': 0.004290294714968558, 'seeds': 5}, 'Wearing_Necktie': {'mean': 0.03433523695020539, 'stdev': 0.0007845935306658337, 'seeds': 5}, 'Wearing_Necklace': {'mean': 0.13172026851016932, 'stdev': 0.005811213717293406, 'seeds': 5}}
('probing', 'beard', 7)
{'avg': {'mean': 0.9452646575203736, 'stdev': 0.005399298487752297, 'seeds': 5}, 'unif': {'mean': 0.5438940259200955, 'stdev': 0.0020482897119737348, 'seeds': 5}, 'worst': {'mean': 0.945958237557013, 'stdev': 0.00540634236995567, 'seeds': 5}, 'error': {'mean': 1.7300229520986713e-06, 'stdev': 3.796027439193902e-08, 'seeds': 5}, 'Eyeglasses': {'mean': 0.0035066626590521993, 'stdev': 6.135381581963675e-05, 'seeds': 5}, 'Wearing_Earrings': {'mean': 0.11213305280032061, 'stdev': 0.0007299127431541541, 'seeds': 5}, 'Wearing_Necktie': {'mean': 0.034024646828975054, 'stdev': 0.00044581896525973445, 'seeds': 5}, 'Wearing_Necklace': {'mean': 0.1293257188658451, 'stdev': 0.0021437576958125083, 'seeds': 5}}
('probing', 'beard', 8)
{'avg': {'mean': 0.937635863777189, 'stdev': 0.004719858927687455, 'seeds': 5}, 'unif': {'mean': 0.5408464116048582, 'stdev': 0.002121501256782897, 'seeds': 5}, 'worst': {'mean': 0.9383215274035448, 'stdev': 0.004725014098163645, 'seeds': 5}, 'error': {'mean': 1.7024088361217378e-06, 'stdev': 2.8108324150521236e-08, 'seeds': 5}, 'Eyeglasses': {'mean': 0.0035066626590521993, 'stdev': 6.135381581963675e-05, 'seeds': 5}, 'Wearing_Earrings': {'mean': 0.11089069231539926, 'stdev': 0.000168397318043999, 'seeds': 5}, 'Wearing_Necktie': {'mean': 0.03420498948001202, 'stdev': 0.00040450113692388275, 'seeds': 5}, 'Wearing_Necklace': {'mean': 0.12800320609157398, 'stdev': 0.0006200480291259679, 'seeds': 5}}
('probing', 'beard', 9)
{'avg': {'mean': 0.9408542849263348, 'stdev': 0.004838549866811081, 'seeds': 5}, 'unif': {'mean': 0.5420461525481018, 'stdev': 0.002053761619202784, 'seeds': 5}, 'worst': {'mean': 0.9415434368903539, 'stdev': 0.004843840459122111, 'seeds': 5}, 'error': {'mean': 1.697964192197012e-06, 'stdev': 1.7031501476501627e-08, 'seeds': 5}, 'Eyeglasses': {'mean': 0.003536719767558361, 'stdev': 2.7438260570341864e-05, 'seeds': 5}, 'Wearing_Earrings': {'mean': 0.1109608255685803, 'stdev': 0.0002125358524756663, 'seeds': 5}, 'Wearing_Necktie': {'mean': 0.03388438032261296, 'stdev': 0.0002933884473368655, 'seeds': 5}, 'Wearing_Necklace': {'mean': 0.12769261597034365, 'stdev': 0.0002034875865303078, 'seeds': 5}}
('finetuning', 'individual', 0)
{'avg': {'mean': 0.0, 'stdev': 0.0, 'seeds': 5}, 'unif': {'mean': 0.0, 'stdev': 0.0, 'seeds': 5}, 'worst': {'mean': 0.0, 'stdev': 0.0, 'seeds': 5}, 'error': {'mean': 1.5360187016937354e-06, 'stdev': 1.3208100237543148e-07, 'seeds': 5}, 'Eyeglasses': {'mean': 0.003236148682496744, 'stdev': 0.00026174432376742076, 'seeds': 5}, 'Wearing_Earrings': {'mean': 0.09511071034966437, 'stdev': 0.0012896955419321556, 'seeds': 5}, 'Wearing_Necktie': {'mean': 0.03631900611161206, 'stdev': 0.0032715643457079833, 'seeds': 5}, 'Wearing_Necklace': {'mean': 0.13780182346458272, 'stdev': 0.00024643570536517006, 'seeds': 5}}
('finetuning', 'individual', 1)
{'avg': {'mean': 0.0, 'stdev': 0.0, 'seeds': 5}, 'unif': {'mean': 0.0, 'stdev': 0.0, 'seeds': 5}, 'worst': {'mean': 0.0, 'stdev': 0.0, 'seeds': 5}, 'error': {'mean': 1.0571294221295272e-06, 'stdev': 1.0742658657164902e-07, 'seeds': 5}, 'Eyeglasses': {'mean': 0.002955615669772568, 'stdev': 0.00010019036168720574, 'seeds': 5}, 'Wearing_Earrings': {'mean': 0.0915238954012624, 'stdev': 0.0008582227080959743, 'seeds': 5}, 'Wearing_Necktie': {'mean': 0.031059012123033764, 'stdev': 0.0015877090463621369, 'seeds': 5}, 'Wearing_Necklace': {'mean': 0.12573890391744313, 'stdev': 0.008628594978376957, 'seeds': 5}}
('finetuning', 'individual', 2)
{'avg': {'mean': 0.0, 'stdev': 0.0, 'seeds': 5}, 'unif': {'mean': 0.0, 'stdev': 0.0, 'seeds': 5}, 'worst': {'mean': 0.0, 'stdev': 0.0, 'seeds': 5}, 'error': {'mean': 9.391074831041216e-07, 'stdev': 2.5079510454823234e-08, 'seeds': 5}, 'Eyeglasses': {'mean': 0.002915539525097686, 'stdev': 0.00015602055407672017, 'seeds': 5}, 'Wearing_Earrings': {'mean': 0.09126340046087567, 'stdev': 0.002117491947503926, 'seeds': 5}, 'Wearing_Necktie': {'mean': 0.029996994289149384, 'stdev': 0.0014184103465312847, 'seeds': 5}, 'Wearing_Necklace': {'mean': 0.11791403666967237, 'stdev': 0.002813235815436504, 'seeds': 5}}
('finetuning', 'individual', 3)
{'avg': {'mean': 0.0, 'stdev': 0.0, 'seeds': 5}, 'unif': {'mean': 0.0, 'stdev': 0.0, 'seeds': 5}, 'worst': {'mean': 0.0, 'stdev': 0.0, 'seeds': 5}, 'error': {'mean': 8.967961493029203e-07, 'stdev': 5.578363899120293e-08, 'seeds': 5}, 'Eyeglasses': {'mean': 0.002925558561266406, 'stdev': 0.00015682272159601768, 'seeds': 5}, 'Wearing_Earrings': {'mean': 0.0907925057609458, 'stdev': 0.0006955838075427199, 'seeds': 5}, 'Wearing_Necktie': {'mean': 0.029355775974351267, 'stdev': 0.0006720973782686483, 'seeds': 5}, 'Wearing_Necklace': {'mean': 0.11499849714457469, 'stdev': 0.0012355344436903058, 'seeds': 5}}
('finetuning', 'individual', 4)
{'avg': {'mean': 0.0, 'stdev': 0.0, 'seeds': 5}, 'unif': {'mean': 0.0, 'stdev': 0.0, 'seeds': 5}, 'worst': {'mean': 0.0, 'stdev': 0.0, 'seeds': 5}, 'error': {'mean': 8.547696547053607e-07, 'stdev': 3.0400503211359806e-08, 'seeds': 5}, 'Eyeglasses': {'mean': 0.002835387235747921, 'stdev': 5.7117294113773086e-05, 'seeds': 5}, 'Wearing_Earrings': {'mean': 0.08994088768660455, 'stdev': 0.0009402693298966364, 'seeds': 5}, 'Wearing_Necktie': {'mean': 0.029265604648832783, 'stdev': 0.0003838088630273112, 'seeds': 5}, 'Wearing_Necklace': {'mean': 0.11450756437230739, 'stdev': 0.0009185330836338183, 'seeds': 5}}
('finetuning', 'individual', 5)
{'avg': {'mean': 0.0, 'stdev': 0.0, 'seeds': 5}, 'unif': {'mean': 0.0, 'stdev': 0.0, 'seeds': 5}, 'worst': {'mean': 0.0, 'stdev': 0.0, 'seeds': 5}, 'error': {'mean': 8.448107281381962e-07, 'stdev': 2.894268361968619e-08, 'seeds': 5}, 'Eyeglasses': {'mean': 0.0028554253080853623, 'stdev': 0.0001227076316392735, 'seeds': 5}, 'Wearing_Earrings': {'mean': 0.08969041178238653, 'stdev': 0.00045029967045875517, 'seeds': 5}, 'Wearing_Necktie': {'mean': 0.028844805129746517, 'stdev': 0.0006789699082488671, 'seeds': 5}, 'Wearing_Necklace': {'mean': 0.1144173930467889, 'stdev': 0.00039285610513370667, 'seeds': 5}}
('finetuning', 'individual', 6)
{'avg': {'mean': 0.0, 'stdev': 0.0, 'seeds': 5}, 'unif': {'mean': 0.0, 'stdev': 0.0, 'seeds': 5}, 'worst': {'mean': 0.0, 'stdev': 0.0, 'seeds': 5}, 'error': {'mean': 8.878680364080089e-07, 'stdev': 4.308656213837422e-08, 'seeds': 5}, 'Eyeglasses': {'mean': 0.002975653742110009, 'stdev': 0.00016077353507545545, 'seeds': 5}, 'Wearing_Earrings': {'mean': 0.09013124937381024, 'stdev': 0.0011254147455281856, 'seeds': 5}, 'Wearing_Necktie': {'mean': 0.028854824165915238, 'stdev': 0.000726811848940331, 'seeds': 5}, 'Wearing_Necklace': {'mean': 0.11479811642120027, 'stdev': 0.0011377232091980614, 'seeds': 5}}
('finetuning', 'individual', 7)
{'avg': {'mean': 0.0, 'stdev': 0.0, 'seeds': 5}, 'unif': {'mean': 0.0, 'stdev': 0.0, 'seeds': 5}, 'worst': {'mean': 0.0, 'stdev': 0.0, 'seeds': 5}, 'error': {'mean': 8.584980841586685e-07, 'stdev': 3.0416567056081725e-08, 'seeds': 5}, 'Eyeglasses': {'mean': 0.002885482416591524, 'stdev': 0.00011532776708968369, 'seeds': 5}, 'Wearing_Earrings': {'mean': 0.08996092575894199, 'stdev': 0.0005857067188884508, 'seeds': 5}, 'Wearing_Necktie': {'mean': 0.02871455765955315, 'stdev': 0.0004167244633420572, 'seeds': 5}, 'Wearing_Necklace': {'mean': 0.11520889690411783, 'stdev': 0.0010617342383920597, 'seeds': 5}}
('finetuning', 'individual', 8)
{'avg': {'mean': 0.0, 'stdev': 0.0, 'seeds': 5}, 'unif': {'mean': 0.0, 'stdev': 0.0, 'seeds': 5}, 'worst': {'mean': 0.0, 'stdev': 0.0, 'seeds': 5}, 'error': {'mean': 8.590483114734257e-07, 'stdev': 2.6135741957953364e-08, 'seeds': 5}, 'Eyeglasses': {'mean': 0.002905520488928965, 'stdev': 7.084528415855593e-05, 'seeds': 5}, 'Wearing_Earrings': {'mean': 0.0894800120228434, 'stdev': 0.000505191954132, 'seeds': 5}, 'Wearing_Necktie': {'mean': 0.02870453862338443, 'stdev': 0.0004023238754686148, 'seeds': 5}, 'Wearing_Necklace': {'mean': 0.11510870654243062, 'stdev': 0.0008978085088556184, 'seeds': 5}}
('finetuning', 'individual', 9)
{'avg': {'mean': 0.0, 'stdev': 0.0, 'seeds': 5}, 'unif': {'mean': 0.0, 'stdev': 0.0, 'seeds': 5}, 'worst': {'mean': 0.0, 'stdev': 0.0, 'seeds': 5}, 'error': {'mean': 8.64959737044648e-07, 'stdev': 2.9376470447890663e-08, 'seeds': 5}, 'Eyeglasses': {'mean': 0.0029355775974351265, 'stdev': 0.00010387957796477166, 'seeds': 5}, 'Wearing_Earrings': {'mean': 0.08965033563771165, 'stdev': 0.0006242832413455305, 'seeds': 5}, 'Wearing_Necktie': {'mean': 0.028634405370203387, 'stdev': 0.0004640230909491797, 'seeds': 5}, 'Wearing_Necklace': {'mean': 0.11479811642120027, 'stdev': 0.0003427037646826339, 'seeds': 5}}
('finetuning', 'hair', 0)
{'avg': {'mean': 1.054824117307025, 'stdev': 0.09842698567560478, 'seeds': 5}, 'unif': {'mean': 1.068600583172121, 'stdev': 0.14691822060602946, 'seeds': 5}, 'worst': {'mean': 3.269747493643229, 'stdev': 0.8274728497497668, 'seeds': 5}, 'error': {'mean': 1.5360187016937354e-06, 'stdev': 1.3208100237543148e-07, 'seeds': 5}, 'Eyeglasses': {'mean': 0.003236148682496744, 'stdev': 0.00026174432376742076, 'seeds': 5}, 'Wearing_Earrings': {'mean': 0.09511071034966437, 'stdev': 0.0012896955419321556, 'seeds': 5}, 'Wearing_Necktie': {'mean': 0.03631900611161206, 'stdev': 0.0032715643457079833, 'seeds': 5}, 'Wearing_Necklace': {'mean': 0.13780182346458272, 'stdev': 0.00024643570536517006, 'seeds': 5}}
('finetuning', 'hair', 1)
{'avg': {'mean': 0.9927180609454258, 'stdev': 0.05827844092808318, 'seeds': 5}, 'unif': {'mean': 0.8965737398695048, 'stdev': 0.14873771054642398, 'seeds': 5}, 'worst': {'mean': 2.3929179719470746, 'stdev': 0.7902134454536405, 'seeds': 5}, 'error': {'mean': 1.0571294221295272e-06, 'stdev': 1.0742658657164902e-07, 'seeds': 5}, 'Eyeglasses': {'mean': 0.002955615669772568, 'stdev': 0.00010019036168720574, 'seeds': 5}, 'Wearing_Earrings': {'mean': 0.0915238954012624, 'stdev': 0.0008582227080959743, 'seeds': 5}, 'Wearing_Necktie': {'mean': 0.031059012123033764, 'stdev': 0.0015877090463621369, 'seeds': 5}, 'Wearing_Necklace': {'mean': 0.12573890391744313, 'stdev': 0.008628594978376957, 'seeds': 5}}
('finetuning', 'hair', 2)
{'avg': {'mean': 0.9986345906130155, 'stdev': 0.08257987549576926, 'seeds': 5}, 'unif': {'mean': 0.7534186887487356, 'stdev': 0.08199691894508664, 'seeds': 5}, 'worst': {'mean': 1.6536028223876738, 'stdev': 0.45970568736423983, 'seeds': 5}, 'error': {'mean': 9.391074831041216e-07, 'stdev': 2.5079510454823234e-08, 'seeds': 5}, 'Eyeglasses': {'mean': 0.002915539525097686, 'stdev': 0.00015602055407672017, 'seeds': 5}, 'Wearing_Earrings': {'mean': 0.09126340046087567, 'stdev': 0.002117491947503926, 'seeds': 5}, 'Wearing_Necktie': {'mean': 0.029996994289149384, 'stdev': 0.0014184103465312847, 'seeds': 5}, 'Wearing_Necklace': {'mean': 0.11791403666967237, 'stdev': 0.002813235815436504, 'seeds': 5}}
('finetuning', 'hair', 3)
{'avg': {'mean': 1.013656604664077, 'stdev': 0.09076813351024075, 'seeds': 5}, 'unif': {'mean': 0.7281618416036053, 'stdev': 0.04230153355870505, 'seeds': 5}, 'worst': {'mean': 1.5273144566978558, 'stdev': 0.20484630730546616, 'seeds': 5}, 'error': {'mean': 8.967961493029203e-07, 'stdev': 5.578363899120293e-08, 'seeds': 5}, 'Eyeglasses': {'mean': 0.002925558561266406, 'stdev': 0.00015682272159601768, 'seeds': 5}, 'Wearing_Earrings': {'mean': 0.0907925057609458, 'stdev': 0.0006955838075427199, 'seeds': 5}, 'Wearing_Necktie': {'mean': 0.029355775974351267, 'stdev': 0.0006720973782686483, 'seeds': 5}, 'Wearing_Necklace': {'mean': 0.11499849714457469, 'stdev': 0.0012355344436903058, 'seeds': 5}}
('finetuning', 'hair', 4)
{'avg': {'mean': 1.002739648747541, 'stdev': 0.053750755540975664, 'seeds': 5}, 'unif': {'mean': 0.7655705335795447, 'stdev': 0.03704409366536718, 'seeds': 5}, 'worst': {'mean': 1.7102254925203073, 'stdev': 0.21036907089387422, 'seeds': 5}, 'error': {'mean': 8.547696547053607e-07, 'stdev': 3.0400503211359806e-08, 'seeds': 5}, 'Eyeglasses': {'mean': 0.002835387235747921, 'stdev': 5.7117294113773086e-05, 'seeds': 5}, 'Wearing_Earrings': {'mean': 0.08994088768660455, 'stdev': 0.0009402693298966364, 'seeds': 5}, 'Wearing_Necktie': {'mean': 0.029265604648832783, 'stdev': 0.0003838088630273112, 'seeds': 5}, 'Wearing_Necklace': {'mean': 0.11450756437230739, 'stdev': 0.0009185330836338183, 'seeds': 5}}
('finetuning', 'hair', 5)
{'avg': {'mean': 1.0463924903547566, 'stdev': 0.07458760426121207, 'seeds': 5}, 'unif': {'mean': 0.752139349198657, 'stdev': 0.03840428139155443, 'seeds': 5}, 'worst': {'mean': 1.5930198406905396, 'stdev': 0.19830115643732096, 'seeds': 5}, 'error': {'mean': 8.448107281381962e-07, 'stdev': 2.894268361968619e-08, 'seeds': 5}, 'Eyeglasses': {'mean': 0.0028554253080853623, 'stdev': 0.0001227076316392735, 'seeds': 5}, 'Wearing_Earrings': {'mean': 0.08969041178238653, 'stdev': 0.00045029967045875517, 'seeds': 5}, 'Wearing_Necktie': {'mean': 0.028844805129746517, 'stdev': 0.0006789699082488671, 'seeds': 5}, 'Wearing_Necklace': {'mean': 0.1144173930467889, 'stdev': 0.00039285610513370667, 'seeds': 5}}
('finetuning', 'hair', 6)
{'avg': {'mean': 1.0413063350407876, 'stdev': 0.06481941348410142, 'seeds': 5}, 'unif': {'mean': 0.7496328263444444, 'stdev': 0.042604288512857504, 'seeds': 5}, 'worst': {'mean': 1.5740948573923268, 'stdev': 0.19131482989792475, 'seeds': 5}, 'error': {'mean': 8.878680364080089e-07, 'stdev': 4.308656213837422e-08, 'seeds': 5}, 'Eyeglasses': {'mean': 0.002975653742110009, 'stdev': 0.00016077353507545545, 'seeds': 5}, 'Wearing_Earrings': {'mean': 0.09013124937381024, 'stdev': 0.0011254147455281856, 'seeds': 5}, 'Wearing_Necktie': {'mean': 0.028854824165915238, 'stdev': 0.000726811848940331, 'seeds': 5}, 'Wearing_Necklace': {'mean': 0.11479811642120027, 'stdev': 0.0011377232091980614, 'seeds': 5}}
('finetuning', 'hair', 7)
{'avg': {'mean': 1.017873581283893, 'stdev': 0.06578670644077782, 'seeds': 5}, 'unif': {'mean': 0.7598277551953259, 'stdev': 0.02557304272723374, 'seeds': 5}, 'worst': {'mean': 1.6542979961907474, 'stdev': 0.13356639575583115, 'seeds': 5}, 'error': {'mean': 8.584980841586685e-07, 'stdev': 3.0416567056081725e-08, 'seeds': 5}, 'Eyeglasses': {'mean': 0.002885482416591524, 'stdev': 0.00011532776708968369, 'seeds': 5}, 'Wearing_Earrings': {'mean': 0.08996092575894199, 'stdev': 0.0005857067188884508, 'seeds': 5}, 'Wearing_Necktie': {'mean': 0.02871455765955315, 'stdev': 0.0004167244633420572, 'seeds': 5}, 'Wearing_Necklace': {'mean': 0.11520889690411783, 'stdev': 0.0010617342383920597, 'seeds': 5}}
('finetuning', 'hair', 8)
{'avg': {'mean': 1.0459845605638705, 'stdev': 0.07042621422211984, 'seeds': 5}, 'unif': {'mean': 0.7434572684556081, 'stdev': 0.050479270471806746, 'seeds': 5}, 'worst': {'mean': 1.5665685881029636, 'stdev': 0.27343177390800966, 'seeds': 5}, 'error': {'mean': 8.590483114734257e-07, 'stdev': 2.6135741957953364e-08, 'seeds': 5}, 'Eyeglasses': {'mean': 0.002905520488928965, 'stdev': 7.084528415855593e-05, 'seeds': 5}, 'Wearing_Earrings': {'mean': 0.0894800120228434, 'stdev': 0.000505191954132, 'seeds': 5}, 'Wearing_Necktie': {'mean': 0.02870453862338443, 'stdev': 0.0004023238754686148, 'seeds': 5}, 'Wearing_Necklace': {'mean': 0.11510870654243062, 'stdev': 0.0008978085088556184, 'seeds': 5}}
('finetuning', 'hair', 9)
{'avg': {'mean': 1.0407513849435723, 'stdev': 0.05661429787302101, 'seeds': 5}, 'unif': {'mean': 0.7567443638499209, 'stdev': 0.050831197278299295, 'seeds': 5}, 'worst': {'mean': 1.651520174368174, 'stdev': 0.2692771024499379, 'seeds': 5}, 'error': {'mean': 8.64959737044648e-07, 'stdev': 2.9376470447890663e-08, 'seeds': 5}, 'Eyeglasses': {'mean': 0.0029355775974351265, 'stdev': 0.00010387957796477166, 'seeds': 5}, 'Wearing_Earrings': {'mean': 0.08965033563771165, 'stdev': 0.0006242832413455305, 'seeds': 5}, 'Wearing_Necktie': {'mean': 0.028634405370203387, 'stdev': 0.0004640230909491797, 'seeds': 5}, 'Wearing_Necklace': {'mean': 0.11479811642120027, 'stdev': 0.0003427037646826339, 'seeds': 5}}
('finetuning', 'beard', 0)
{'avg': {'mean': 0.914965132646161, 'stdev': 0.015968990250854135, 'seeds': 5}, 'unif': {'mean': 0.5318920785375183, 'stdev': 0.0018073302889533244, 'seeds': 5}, 'worst': {'mean': 0.91562709394075, 'stdev': 0.0159983380853233, 'seeds': 5}, 'error': {'mean': 1.5360187016937354e-06, 'stdev': 1.3208100237543148e-07, 'seeds': 5}, 'Eyeglasses': {'mean': 0.003236148682496744, 'stdev': 0.00026174432376742076, 'seeds': 5}, 'Wearing_Earrings': {'mean': 0.09511071034966437, 'stdev': 0.0012896955419321556, 'seeds': 5}, 'Wearing_Necktie': {'mean': 0.03631900611161206, 'stdev': 0.0032715643457079833, 'seeds': 5}, 'Wearing_Necklace': {'mean': 0.13780182346458272, 'stdev': 0.00024643570536517006, 'seeds': 5}}
('finetuning', 'beard', 1)
{'avg': {'mean': 0.9173737370719474, 'stdev': 0.03266001800672157, 'seeds': 5}, 'unif': {'mean': 0.5446517462174641, 'stdev': 0.00796125410771701, 'seeds': 5}, 'worst': {'mean': 0.9180178114304585, 'stdev': 0.03271349417260407, 'seeds': 5}, 'error': {'mean': 1.0571294221295272e-06, 'stdev': 1.0742658657164902e-07, 'seeds': 5}, 'Eyeglasses': {'mean': 0.002955615669772568, 'stdev': 0.00010019036168720574, 'seeds': 5}, 'Wearing_Earrings': {'mean': 0.0915238954012624, 'stdev': 0.0008582227080959743, 'seeds': 5}, 'Wearing_Necktie': {'mean': 0.031059012123033764, 'stdev': 0.0015877090463621369, 'seeds': 5}, 'Wearing_Necklace': {'mean': 0.12573890391744313, 'stdev': 0.008628594978376957, 'seeds': 5}}
('finetuning', 'beard', 2)
{'avg': {'mean': 0.9022659847138663, 'stdev': 0.02919288600646394, 'seeds': 5}, 'unif': {'mean': 0.5520993272593463, 'stdev': 0.006143770996114018, 'seeds': 5}, 'worst': {'mean': 0.902871082805221, 'stdev': 0.029235256610858837, 'seeds': 5}, 'error': {'mean': 9.391074831041216e-07, 'stdev': 2.5079510454823234e-08, 'seeds': 5}, 'Eyeglasses': {'mean': 0.002915539525097686, 'stdev': 0.00015602055407672017, 'seeds': 5}, 'Wearing_Earrings': {'mean': 0.09126340046087567, 'stdev': 0.002117491947503926, 'seeds': 5}, 'Wearing_Necktie': {'mean': 0.029996994289149384, 'stdev': 0.0014184103465312847, 'seeds': 5}, 'Wearing_Necklace': {'mean': 0.11791403666967237, 'stdev': 0.002813235815436504, 'seeds': 5}}
('finetuning', 'beard', 3)
{'avg': {'mean': 0.9215081749395249, 'stdev': 0.02390786271386744, 'seeds': 5}, 'unif': {'mean': 0.5554388031044507, 'stdev': 0.0022272809507465066, 'seeds': 5}, 'worst': {'mean': 0.922140753380348, 'stdev': 0.023948060305263183, 'seeds': 5}, 'error': {'mean': 8.967961493029203e-07, 'stdev': 5.578363899120293e-08, 'seeds': 5}, 'Eyeglasses': {'mean': 0.002925558561266406, 'stdev': 0.00015682272159601768, 'seeds': 5}, 'Wearing_Earrings': {'mean': 0.0907925057609458, 'stdev': 0.0006955838075427199, 'seeds': 5}, 'Wearing_Necktie': {'mean': 0.029355775974351267, 'stdev': 0.0006720973782686483, 'seeds': 5}, 'Wearing_Necklace': {'mean': 0.11499849714457469, 'stdev': 0.0012355344436903058, 'seeds': 5}}
('finetuning', 'beard', 4)
{'avg': {'mean': 0.9026365681784767, 'stdev': 0.04481644094104778, 'seeds': 5}, 'unif': {'mean': 0.5567488959245376, 'stdev': 0.0075176798945416415, 'seeds': 5}, 'worst': {'mean': 0.9032342720598954, 'stdev': 0.04488360858015829, 'seeds': 5}, 'error': {'mean': 8.547696547053607e-07, 'stdev': 3.0400503211359806e-08, 'seeds': 5}, 'Eyeglasses': {'mean': 0.002835387235747921, 'stdev': 5.7117294113773086e-05, 'seeds': 5}, 'Wearing_Earrings': {'mean': 0.08994088768660455, 'stdev': 0.0009402693298966364, 'seeds': 5}, 'Wearing_Necktie': {'mean': 0.029265604648832783, 'stdev': 0.0003838088630273112, 'seeds': 5}, 'Wearing_Necklace': {'mean': 0.11450756437230739, 'stdev': 0.0009185330836338183, 'seeds': 5}}
('finetuning', 'beard', 5)
{'avg': {'mean': 0.9237352926668027, 'stdev': 0.035621995373410105, 'seeds': 5}, 'unif': {'mean': 0.5562714191439941, 'stdev': 0.004581628258298209, 'seeds': 5}, 'worst': {'mean': 0.9243702808467933, 'stdev': 0.0356782145021448, 'seeds': 5}, 'error': {'mean': 8.448107281381962e-07, 'stdev': 2.894268361968619e-08, 'seeds': 5}, 'Eyeglasses': {'mean': 0.0028554253080853623, 'stdev': 0.0001227076316392735, 'seeds': 5}, 'Wearing_Earrings': {'mean': 0.08969041178238653, 'stdev': 0.00045029967045875517, 'seeds': 5}, 'Wearing_Necktie': {'mean': 0.028844805129746517, 'stdev': 0.0006789699082488671, 'seeds': 5}, 'Wearing_Necklace': {'mean': 0.1144173930467889, 'stdev': 0.00039285610513370667, 'seeds': 5}}
('finetuning', 'beard', 6)
{'avg': {'mean': 0.9248658531589777, 'stdev': 0.01632550849661981, 'seeds': 5}, 'unif': {'mean': 0.5561413919819136, 'stdev': 0.00408272419010863, 'seeds': 5}, 'worst': {'mean': 0.9255030196708208, 'stdev': 0.01634895363572522, 'seeds': 5}, 'error': {'mean': 8.878680364080089e-07, 'stdev': 4.308656213837422e-08, 'seeds': 5}, 'Eyeglasses': {'mean': 0.002975653742110009, 'stdev': 0.00016077353507545545, 'seeds': 5}, 'Wearing_Earrings': {'mean': 0.09013124937381024, 'stdev': 0.0011254147455281856, 'seeds': 5}, 'Wearing_Necktie': {'mean': 0.028854824165915238, 'stdev': 0.000726811848940331, 'seeds': 5}, 'Wearing_Necklace': {'mean': 0.11479811642120027, 'stdev': 0.0011377232091980614, 'seeds': 5}}
('finetuning', 'beard', 7)
{'avg': {'mean': 0.9151018086294447, 'stdev': 0.030975800542655522, 'seeds': 5}, 'unif': {'mean': 0.5569059999189158, 'stdev': 0.005821119995848398, 'seeds': 5}, 'worst': {'mean': 0.9157207813259246, 'stdev': 0.031019919446346484, 'seeds': 5}, 'error': {'mean': 8.584980841586685e-07, 'stdev': 3.0416567056081725e-08, 'seeds': 5}, 'Eyeglasses': {'mean': 0.002885482416591524, 'stdev': 0.00011532776708968369, 'seeds': 5}, 'Wearing_Earrings': {'mean': 0.08996092575894199, 'stdev': 0.0005857067188884508, 'seeds': 5}, 'Wearing_Necktie': {'mean': 0.02871455765955315, 'stdev': 0.0004167244633420572, 'seeds': 5}, 'Wearing_Necklace': {'mean': 0.11520889690411783, 'stdev': 0.0010617342383920597, 'seeds': 5}}
('finetuning', 'beard', 8)
{'avg': {'mean': 0.9175815943705738, 'stdev': 0.026700370331480518, 'seeds': 5}, 'unif': {'mean': 0.5562553761907791, 'stdev': 0.005009998811610759, 'seeds': 5}, 'worst': {'mean': 0.9182059765049734, 'stdev': 0.026740913548712945, 'seeds': 5}, 'error': {'mean': 8.590483114734257e-07, 'stdev': 2.6135741957953364e-08, 'seeds': 5}, 'Eyeglasses': {'mean': 0.002905520488928965, 'stdev': 7.084528415855593e-05, 'seeds': 5}, 'Wearing_Earrings': {'mean': 0.0894800120228434, 'stdev': 0.000505191954132, 'seeds': 5}, 'Wearing_Necktie': {'mean': 0.02870453862338443, 'stdev': 0.0004023238754686148, 'seeds': 5}, 'Wearing_Necklace': {'mean': 0.11510870654243062, 'stdev': 0.0008978085088556184, 'seeds': 5}}
('finetuning', 'beard', 9)
{'avg': {'mean': 0.9193649430957852, 'stdev': 0.028087298605967693, 'seeds': 5}, 'unif': {'mean': 0.5569176047912465, 'stdev': 0.004674453608167768, 'seeds': 5}, 'worst': {'mean': 0.9199912625581205, 'stdev': 0.028128425374015734, 'seeds': 5}, 'error': {'mean': 8.64959737044648e-07, 'stdev': 2.9376470447890663e-08, 'seeds': 5}, 'Eyeglasses': {'mean': 0.0029355775974351265, 'stdev': 0.00010387957796477166, 'seeds': 5}, 'Wearing_Earrings': {'mean': 0.08965033563771165, 'stdev': 0.0006242832413455305, 'seeds': 5}, 'Wearing_Necktie': {'mean': 0.028634405370203387, 'stdev': 0.0004640230909491797, 'seeds': 5}, 'Wearing_Necklace': {'mean': 0.11479811642120027, 'stdev': 0.0003427037646826339, 'seeds': 5}}
('scratch', 'individual', 0)
{'avg': {'mean': 0.08197714538975194, 'stdev': 0.18330646969286882, 'seeds': 5}, 'unif': {'mean': 0.08197714538977469, 'stdev': 0.1833064696929197, 'seeds': 5}, 'worst': {'mean': 1636.4277762706822, 'stdev': 3659.163748010063, 'seeds': 5}, 'error': {'mean': 0.00011373337200045755, 'stdev': 8.237556410197962e-06, 'seeds': 5}, 'Eyeglasses': {'mean': 0.06445245967337943, 'stdev': 0.004301569072912347, 'seeds': 5}, 'Wearing_Earrings': {'mean': 0.2030257489229536, 'stdev': 0.003386597252757003, 'seeds': 5}, 'Wearing_Necktie': {'mean': 0.06305981364592726, 'stdev': 0.0031033550102400353, 'seeds': 5}, 'Wearing_Necklace': {'mean': 0.13791203286243864, 'stdev': 0.0, 'seeds': 5}}
('scratch', 'individual', 1)
{'avg': {'mean': 0.0, 'stdev': 0.0, 'seeds': 5}, 'unif': {'mean': 0.0, 'stdev': 0.0, 'seeds': 5}, 'worst': {'mean': 0.0, 'stdev': 0.0, 'seeds': 5}, 'error': {'mean': 6.52492833689112e-05, 'stdev': 1.9830900168668106e-05, 'seeds': 5}, 'Eyeglasses': {'mean': 0.04461476805931269, 'stdev': 0.0113747282960355, 'seeds': 5}, 'Wearing_Earrings': {'mean': 0.19378819757539326, 'stdev': 0.0038574265117376186, 'seeds': 5}, 'Wearing_Necktie': {'mean': 0.05442340446849013, 'stdev': 0.0031001591983551894, 'seeds': 5}, 'Wearing_Necklace': {'mean': 0.13791203286243864, 'stdev': 0.0, 'seeds': 5}}
('scratch', 'individual', 2)
{'avg': {'mean': 0.0, 'stdev': 0.0, 'seeds': 5}, 'unif': {'mean': 0.0, 'stdev': 0.0, 'seeds': 5}, 'worst': {'mean': 0.0, 'stdev': 0.0, 'seeds': 5}, 'error': {'mean': 4.0564115642642706e-05, 'stdev': 1.4334615334273432e-05, 'seeds': 5}, 'Eyeglasses': {'mean': 0.03010720368700531, 'stdev': 0.009103481182038891, 'seeds': 5}, 'Wearing_Earrings': {'mean': 0.1878268710550045, 'stdev': 0.006816498215706875, 'seeds': 5}, 'Wearing_Necktie': {'mean': 0.05150786494339245, 'stdev': 0.0020213886552217213, 'seeds': 5}, 'Wearing_Necklace': {'mean': 0.1379020138262699, 'stdev': 2.2403245942294957e-05, 'seeds': 5}}
('scratch', 'individual', 3)
{'avg': {'mean': 0.0, 'stdev': 0.0, 'seeds': 5}, 'unif': {'mean': 0.0, 'stdev': 0.0, 'seeds': 5}, 'worst': {'mean': 0.0, 'stdev': 0.0, 'seeds': 5}, 'error': {'mean': 2.9077425746207575e-05, 'stdev': 7.96024891851197e-06, 'seeds': 5}, 'Eyeglasses': {'mean': 0.022993688007213707, 'stdev': 0.00400322873940628, 'seeds': 5}, 'Wearing_Earrings': {'mean': 0.1836288949003106, 'stdev': 0.006805813349659046, 'seeds': 5}, 'Wearing_Necktie': {'mean': 0.04928363891393648, 'stdev': 0.003169366545273871, 'seeds': 5}, 'Wearing_Necklace': {'mean': 0.13791203286243864, 'stdev': 0.0, 'seeds': 5}}
('scratch', 'individual', 4)
{'avg': {'mean': 0.0, 'stdev': 0.0, 'seeds': 5}, 'unif': {'mean': 0.0, 'stdev': 0.0, 'seeds': 5}, 'worst': {'mean': 0.0, 'stdev': 0.0, 'seeds': 5}, 'error': {'mean': 2.1930955770444036e-05, 'stdev': 4.22952081871015e-06, 'seeds': 5}, 'Eyeglasses': {'mean': 0.01937681595030558, 'stdev': 0.003113648223828063, 'seeds': 5}, 'Wearing_Earrings': {'mean': 0.1772567878970043, 'stdev': 0.0035206970078580455, 'seeds': 5}, 'Wearing_Necktie': {'mean': 0.04615769962929566, 'stdev': 0.001003530389568842, 'seeds': 5}, 'Wearing_Necklace': {'mean': 0.13786193768159502, 'stdev': 8.676739843547322e-05, 'seeds': 5}}
('scratch', 'individual', 5)
{'avg': {'mean': 0.0, 'stdev': 0.0, 'seeds': 5}, 'unif': {'mean': 0.0, 'stdev': 0.0, 'seeds': 5}, 'worst': {'mean': 0.0, 'stdev': 0.0, 'seeds': 5}, 'error': {'mean': 2.009089167955774e-05, 'stdev': 3.7328816952262858e-06, 'seeds': 5}, 'Eyeglasses': {'mean': 0.01800420799519086, 'stdev': 0.0022103274516367196, 'seeds': 5}, 'Wearing_Earrings': {'mean': 0.1773569782586915, 'stdev': 0.008557453457450733, 'seeds': 5}, 'Wearing_Necktie': {'mean': 0.04537621480813546, 'stdev': 0.002374479865964434, 'seeds': 5}, 'Wearing_Necklace': {'mean': 0.1378919947901012, 'stdev': 7.597310333686e-05, 'seeds': 5}}
('scratch', 'individual', 6)
{'avg': {'mean': 0.0, 'stdev': 0.0, 'seeds': 5}, 'unif': {'mean': 0.0, 'stdev': 0.0, 'seeds': 5}, 'worst': {'mean': 0.0, 'stdev': 0.0, 'seeds': 5}, 'error': {'mean': 1.677149473930684e-05, 'stdev': 1.713334420891703e-06, 'seeds': 5}, 'Eyeglasses': {'mean': 0.01569982967638513, 'stdev': 0.0013109249360822462, 'seeds': 5}, 'Wearing_Earrings': {'mean': 0.1748722572888488, 'stdev': 0.0036206376428502204, 'seeds': 5}, 'Wearing_Necktie': {'mean': 0.04424406372107003, 'stdev': 0.0012061396624080353, 'seeds': 5}, 'Wearing_Necklace': {'mean': 0.13796212804328223, 'stdev': 0.00012270763163927629, 'seeds': 5}}
('scratch', 'individual', 7)
{'avg': {'mean': 0.0, 'stdev': 0.0, 'seeds': 5}, 'unif': {'mean': 0.0, 'stdev': 0.0, 'seeds': 5}, 'worst': {'mean': 0.0, 'stdev': 0.0, 'seeds': 5}, 'error': {'mean': 1.4884356988735256e-05, 'stdev': 1.2352621821603619e-06, 'seeds': 5}, 'Eyeglasses': {'mean': 0.014527602444644825, 'stdev': 0.0011796324856544048, 'seeds': 5}, 'Wearing_Earrings': {'mean': 0.17211702234245066, 'stdev': 0.004434399828647334, 'seeds': 5}, 'Wearing_Necktie': {'mean': 0.04326219817653542, 'stdev': 0.0018496589834558262, 'seeds': 5}, 'Wearing_Necklace': {'mean': 0.1377417092475704, 'stdev': 0.0002053291406864979, 'seeds': 5}}
('scratch', 'individual', 8)
{'avg': {'mean': 0.0, 'stdev': 0.0, 'seeds': 5}, 'unif': {'mean': 0.0, 'stdev': 0.0, 'seeds': 5}, 'worst': {'mean': 0.0, 'stdev': 0.0, 'seeds': 5}, 'error': {'mean': 1.2741569409664184e-05, 'stdev': 1.540273568911338e-06, 'seeds': 5}, 'Eyeglasses': {'mean': 0.013154994489530107, 'stdev': 0.0015031058803427896, 'seeds': 5}, 'Wearing_Earrings': {'mean': 0.16846007414086767, 'stdev': 0.00214750041491856, 'seeds': 5}, 'Wearing_Necktie': {'mean': 0.041749323715058614, 'stdev': 0.0011671209592965409, 'seeds': 5}, 'Wearing_Necklace': {'mean': 0.13771165213906422, 'stdev': 0.0002766596788194397, 'seeds': 5}}
('scratch', 'individual', 9)
{'avg': {'mean': 0.0, 'stdev': 0.0, 'seeds': 5}, 'unif': {'mean': 0.0, 'stdev': 0.0, 'seeds': 5}, 'worst': {'mean': 0.0, 'stdev': 0.0, 'seeds': 5}, 'error': {'mean': 1.2064022789549514e-05, 'stdev': 1.367158741297006e-06, 'seeds': 5}, 'Eyeglasses': {'mean': 0.01252379521090071, 'stdev': 0.0013805744694440104, 'seeds': 5}, 'Wearing_Earrings': {'mean': 0.16757839895802024, 'stdev': 0.0016117886025200081, 'seeds': 5}, 'Wearing_Necktie': {'mean': 0.04168920949804629, 'stdev': 0.0005001998163056455, 'seeds': 5}, 'Wearing_Necklace': {'mean': 0.13786193768159502, 'stdev': 0.0004007614467488232, 'seeds': 5}}
('scratch', 'hair', 0)
{'avg': {'mean': 1.1220257247271288, 'stdev': 0.028728603747242763, 'seeds': 5}, 'unif': {'mean': 1.020662475133722, 'stdev': 0.03319774770221976, 'seeds': 5}, 'worst': {'mean': 2.8421556402014594, 'stdev': 0.1910388326623049, 'seeds': 5}, 'error': {'mean': 0.00011373337200045755, 'stdev': 8.237556410197962e-06, 'seeds': 5}, 'Eyeglasses': {'mean': 0.06445245967337943, 'stdev': 0.004301569072912347, 'seeds': 5}, 'Wearing_Earrings': {'mean': 0.2030257489229536, 'stdev': 0.003386597252757003, 'seeds': 5}, 'Wearing_Necktie': {'mean': 0.06305981364592726, 'stdev': 0.0031033550102400353, 'seeds': 5}, 'Wearing_Necklace': {'mean': 0.13791203286243864, 'stdev': 0.0, 'seeds': 5}}
('scratch', 'hair', 1)
{'avg': {'mean': 1.1189622578021894, 'stdev': 0.04523625051140973, 'seeds': 5}, 'unif': {'mean': 1.0573057460190438, 'stdev': 0.10678706744421892, 'seeds': 5}, 'worst': {'mean': 3.0466846318076697, 'stdev': 0.6177398885484627, 'seeds': 5}, 'error': {'mean': 6.52492833689112e-05, 'stdev': 1.9830900168668106e-05, 'seeds': 5}, 'Eyeglasses': {'mean': 0.04461476805931269, 'stdev': 0.0113747282960355, 'seeds': 5}, 'Wearing_Earrings': {'mean': 0.19378819757539326, 'stdev': 0.0038574265117376186, 'seeds': 5}, 'Wearing_Necktie': {'mean': 0.05442340446849013, 'stdev': 0.0031001591983551894, 'seeds': 5}, 'Wearing_Necklace': {'mean': 0.13791203286243864, 'stdev': 0.0, 'seeds': 5}}
('scratch', 'hair', 2)
{'avg': {'mean': 1.1174913163080016, 'stdev': 0.02031838367595058, 'seeds': 5}, 'unif': {'mean': 1.0736380304477608, 'stdev': 0.12403511743873007, 'seeds': 5}, 'worst': {'mean': 3.1793984982194896, 'stdev': 0.6810916103221327, 'seeds': 5}, 'error': {'mean': 4.0564115642642706e-05, 'stdev': 1.4334615334273432e-05, 'seeds': 5}, 'Eyeglasses': {'mean': 0.03010720368700531, 'stdev': 0.009103481182038891, 'seeds': 5}, 'Wearing_Earrings': {'mean': 0.1878268710550045, 'stdev': 0.006816498215706875, 'seeds': 5}, 'Wearing_Necktie': {'mean': 0.05150786494339245, 'stdev': 0.0020213886552217213, 'seeds': 5}, 'Wearing_Necklace': {'mean': 0.1379020138262699, 'stdev': 2.2403245942294957e-05, 'seeds': 5}}
('scratch', 'hair', 3)
{'avg': {'mean': 1.155636547267526, 'stdev': 0.02329663059481603, 'seeds': 5}, 'unif': {'mean': 1.0282005755912809, 'stdev': 0.05858945872368407, 'seeds': 5}, 'worst': {'mean': 2.9770356001238243, 'stdev': 0.30517136874415657, 'seeds': 5}, 'error': {'mean': 2.9077425746207575e-05, 'stdev': 7.96024891851197e-06, 'seeds': 5}, 'Eyeglasses': {'mean': 0.022993688007213707, 'stdev': 0.00400322873940628, 'seeds': 5}, 'Wearing_Earrings': {'mean': 0.1836288949003106, 'stdev': 0.006805813349659046, 'seeds': 5}, 'Wearing_Necktie': {'mean': 0.04928363891393648, 'stdev': 0.003169366545273871, 'seeds': 5}, 'Wearing_Necklace': {'mean': 0.13791203286243864, 'stdev': 0.0, 'seeds': 5}}
('scratch', 'hair', 4)
{'avg': {'mean': 1.13058003607305, 'stdev': 0.04475831343127161, 'seeds': 5}, 'unif': {'mean': 1.0263392627512513, 'stdev': 0.10057407999676207, 'seeds': 5}, 'worst': {'mean': 2.9613909653020176, 'stdev': 0.5152096733340588, 'seeds': 5}, 'error': {'mean': 2.1930955770444036e-05, 'stdev': 4.22952081871015e-06, 'seeds': 5}, 'Eyeglasses': {'mean': 0.01937681595030558, 'stdev': 0.003113648223828063, 'seeds': 5}, 'Wearing_Earrings': {'mean': 0.1772567878970043, 'stdev': 0.0035206970078580455, 'seeds': 5}, 'Wearing_Necktie': {'mean': 0.04615769962929566, 'stdev': 0.001003530389568842, 'seeds': 5}, 'Wearing_Necklace': {'mean': 0.13786193768159502, 'stdev': 8.676739843547322e-05, 'seeds': 5}}
('scratch', 'hair', 5)
{'avg': {'mean': 1.1593232774676916, 'stdev': 0.05931425805273858, 'seeds': 5}, 'unif': {'mean': 1.0273276653426449, 'stdev': 0.10247832567935752, 'seeds': 5}, 'worst': {'mean': 2.95992456928017, 'stdev': 0.5394031569408763, 'seeds': 5}, 'error': {'mean': 2.009089167955774e-05, 'stdev': 3.7328816952262858e-06, 'seeds': 5}, 'Eyeglasses': {'mean': 0.01800420799519086, 'stdev': 0.0022103274516367196, 'seeds': 5}, 'Wearing_Earrings': {'mean': 0.1773569782586915, 'stdev': 0.008557453457450733, 'seeds': 5}, 'Wearing_Necktie': {'mean': 0.04537621480813546, 'stdev': 0.002374479865964434, 'seeds': 5}, 'Wearing_Necklace': {'mean': 0.1378919947901012, 'stdev': 7.597310333686e-05, 'seeds': 5}}
('scratch', 'hair', 6)
{'avg': {'mean': 1.1343170757774776, 'stdev': 0.04181937952836399, 'seeds': 5}, 'unif': {'mean': 1.0418702647560931, 'stdev': 0.09748420550149704, 'seeds': 5}, 'worst': {'mean': 3.056442338682147, 'stdev': 0.5069848435461657, 'seeds': 5}, 'error': {'mean': 1.677149473930684e-05, 'stdev': 1.713334420891703e-06, 'seeds': 5}, 'Eyeglasses': {'mean': 0.01569982967638513, 'stdev': 0.0013109249360822462, 'seeds': 5}, 'Wearing_Earrings': {'mean': 0.1748722572888488, 'stdev': 0.0036206376428502204, 'seeds': 5}, 'Wearing_Necktie': {'mean': 0.04424406372107003, 'stdev': 0.0012061396624080353, 'seeds': 5}, 'Wearing_Necklace': {'mean': 0.13796212804328223, 'stdev': 0.00012270763163927629, 'seeds': 5}}
('scratch', 'hair', 7)
{'avg': {'mean': 1.1294777258538389, 'stdev': 0.036670699207381, 'seeds': 5}, 'unif': {'mean': 0.9685547215775687, 'stdev': 0.07401147109645485, 'seeds': 5}, 'worst': {'mean': 2.659422366255739, 'stdev': 0.38959334762635495, 'seeds': 5}, 'error': {'mean': 1.4884356988735256e-05, 'stdev': 1.2352621821603619e-06, 'seeds': 5}, 'Eyeglasses': {'mean': 0.014527602444644825, 'stdev': 0.0011796324856544048, 'seeds': 5}, 'Wearing_Earrings': {'mean': 0.17211702234245066, 'stdev': 0.004434399828647334, 'seeds': 5}, 'Wearing_Necktie': {'mean': 0.04326219817653542, 'stdev': 0.0018496589834558262, 'seeds': 5}, 'Wearing_Necklace': {'mean': 0.1377417092475704, 'stdev': 0.0002053291406864979, 'seeds': 5}}
('scratch', 'hair', 8)
{'avg': {'mean': 1.1610065549487167, 'stdev': 0.046216361468528644, 'seeds': 5}, 'unif': {'mean': 1.0000672270711084, 'stdev': 0.09741076189088313, 'seeds': 5}, 'worst': {'mean': 2.8231869769811464, 'stdev': 0.5128100623878324, 'seeds': 5}, 'error': {'mean': 1.2741569409664184e-05, 'stdev': 1.540273568911338e-06, 'seeds': 5}, 'Eyeglasses': {'mean': 0.013154994489530107, 'stdev': 0.0015031058803427896, 'seeds': 5}, 'Wearing_Earrings': {'mean': 0.16846007414086767, 'stdev': 0.00214750041491856, 'seeds': 5}, 'Wearing_Necktie': {'mean': 0.041749323715058614, 'stdev': 0.0011671209592965409, 'seeds': 5}, 'Wearing_Necklace': {'mean': 0.13771165213906422, 'stdev': 0.0002766596788194397, 'seeds': 5}}
('scratch', 'hair', 9)
{'avg': {'mean': 1.1453330256071548, 'stdev': 0.020017205709036343, 'seeds': 5}, 'unif': {'mean': 1.0212863166317985, 'stdev': 0.10125402042054264, 'seeds': 5}, 'worst': {'mean': 2.950802332798911, 'stdev': 0.5251156392949177, 'seeds': 5}, 'error': {'mean': 1.2064022789549514e-05, 'stdev': 1.367158741297006e-06, 'seeds': 5}, 'Eyeglasses': {'mean': 0.01252379521090071, 'stdev': 0.0013805744694440104, 'seeds': 5}, 'Wearing_Earrings': {'mean': 0.16757839895802024, 'stdev': 0.0016117886025200081, 'seeds': 5}, 'Wearing_Necktie': {'mean': 0.04168920949804629, 'stdev': 0.0005001998163056455, 'seeds': 5}, 'Wearing_Necklace': {'mean': 0.13786193768159502, 'stdev': 0.0004007614467488232, 'seeds': 5}}
('scratch', 'beard', 0)
{'avg': {'mean': 0.8890719181752385, 'stdev': 0.014140344182727303, 'seeds': 5}, 'unif': {'mean': 0.4926175592952043, 'stdev': 0.00530440143403543, 'seeds': 5}, 'worst': {'mean': 0.8897570027507129, 'stdev': 0.014155686017856273, 'seeds': 5}, 'error': {'mean': 0.00011373337200045755, 'stdev': 8.237556410197962e-06, 'seeds': 5}, 'Eyeglasses': {'mean': 0.06445245967337943, 'stdev': 0.004301569072912347, 'seeds': 5}, 'Wearing_Earrings': {'mean': 0.2030257489229536, 'stdev': 0.003386597252757003, 'seeds': 5}, 'Wearing_Necktie': {'mean': 0.06305981364592726, 'stdev': 0.0031033550102400353, 'seeds': 5}, 'Wearing_Necklace': {'mean': 0.13791203286243864, 'stdev': 0.0, 'seeds': 5}}
('scratch', 'beard', 1)
{'avg': {'mean': 0.9133228693585829, 'stdev': 0.025330179844038417, 'seeds': 5}, 'unif': {'mean': 0.5021885210285278, 'stdev': 0.009070319024915466, 'seeds': 5}, 'worst': {'mean': 0.914033321379553, 'stdev': 0.025358367394711846, 'seeds': 5}, 'error': {'mean': 6.52492833689112e-05, 'stdev': 1.9830900168668106e-05, 'seeds': 5}, 'Eyeglasses': {'mean': 0.04461476805931269, 'stdev': 0.0113747282960355, 'seeds': 5}, 'Wearing_Earrings': {'mean': 0.19378819757539326, 'stdev': 0.0038574265117376186, 'seeds': 5}, 'Wearing_Necktie': {'mean': 0.05442340446849013, 'stdev': 0.0031001591983551894, 'seeds': 5}, 'Wearing_Necklace': {'mean': 0.13791203286243864, 'stdev': 0.0, 'seeds': 5}}
('scratch', 'beard', 2)
{'avg': {'mean': 0.9359577154299527, 'stdev': 0.017738797695017686, 'seeds': 5}, 'unif': {'mean': 0.5102692708437744, 'stdev': 0.005976579119441763, 'seeds': 5}, 'worst': {'mean': 0.9366933173493454, 'stdev': 0.017759857327300364, 'seeds': 5}, 'error': {'mean': 4.0564115642642706e-05, 'stdev': 1.4334615334273432e-05, 'seeds': 5}, 'Eyeglasses': {'mean': 0.03010720368700531, 'stdev': 0.009103481182038891, 'seeds': 5}, 'Wearing_Earrings': {'mean': 0.1878268710550045, 'stdev': 0.006816498215706875, 'seeds': 5}, 'Wearing_Necktie': {'mean': 0.05150786494339245, 'stdev': 0.0020213886552217213, 'seeds': 5}, 'Wearing_Necklace': {'mean': 0.1379020138262699, 'stdev': 2.2403245942294957e-05, 'seeds': 5}}
('scratch', 'beard', 3)
{'avg': {'mean': 0.9456214735177404, 'stdev': 0.02277691871078494, 'seeds': 5}, 'unif': {'mean': 0.5146764298901323, 'stdev': 0.007566754824765174, 'seeds': 5}, 'worst': {'mean': 0.9463661589920039, 'stdev': 0.02280336479900006, 'seeds': 5}, 'error': {'mean': 2.9077425746207575e-05, 'stdev': 7.96024891851197e-06, 'seeds': 5}, 'Eyeglasses': {'mean': 0.022993688007213707, 'stdev': 0.00400322873940628, 'seeds': 5}, 'Wearing_Earrings': {'mean': 0.1836288949003106, 'stdev': 0.006805813349659046, 'seeds': 5}, 'Wearing_Necktie': {'mean': 0.04928363891393648, 'stdev': 0.003169366545273871, 'seeds': 5}, 'Wearing_Necklace': {'mean': 0.13791203286243864, 'stdev': 0.0, 'seeds': 5}}
('scratch', 'beard', 4)
{'avg': {'mean': 0.9274114478779796, 'stdev': 0.026838896692885167, 'seeds': 5}, 'unif': {'mean': 0.5100692567242641, 'stdev': 0.008356745887726799, 'seeds': 5}, 'worst': {'mean': 0.9281326272305331, 'stdev': 0.026870865993747172, 'seeds': 5}, 'error': {'mean': 2.1930955770444036e-05, 'stdev': 4.22952081871015e-06, 'seeds': 5}, 'Eyeglasses': {'mean': 0.01937681595030558, 'stdev': 0.003113648223828063, 'seeds': 5}, 'Wearing_Earrings': {'mean': 0.1772567878970043, 'stdev': 0.0035206970078580455, 'seeds': 5}, 'Wearing_Necktie': {'mean': 0.04615769962929566, 'stdev': 0.001003530389568842, 'seeds': 5}, 'Wearing_Necklace': {'mean': 0.13786193768159502, 'stdev': 8.676739843547322e-05, 'seeds': 5}}
('scratch', 'beard', 5)
{'avg': {'mean': 0.9204829978312707, 'stdev': 0.004276059420262992, 'seeds': 5}, 'unif': {'mean': 0.506976792582854, 'stdev': 0.001492976919202833, 'seeds': 5}, 'worst': {'mean': 0.9211975484894573, 'stdev': 0.004281867157095123, 'seeds': 5}, 'error': {'mean': 2.009089167955774e-05, 'stdev': 3.7328816952262858e-06, 'seeds': 5}, 'Eyeglasses': {'mean': 0.01800420799519086, 'stdev': 0.0022103274516367196, 'seeds': 5}, 'Wearing_Earrings': {'mean': 0.1773569782586915, 'stdev': 0.008557453457450733, 'seeds': 5}, 'Wearing_Necktie': {'mean': 0.04537621480813546, 'stdev': 0.002374479865964434, 'seeds': 5}, 'Wearing_Necklace': {'mean': 0.1378919947901012, 'stdev': 7.597310333686e-05, 'seeds': 5}}
('scratch', 'beard', 6)
{'avg': {'mean': 0.9292306318513305, 'stdev': 0.01861824547582538, 'seeds': 5}, 'unif': {'mean': 0.5108724714379326, 'stdev': 0.005615040605824899, 'seeds': 5}, 'worst': {'mean': 0.9299535668280899, 'stdev': 0.01864111193267322, 'seeds': 5}, 'error': {'mean': 1.677149473930684e-05, 'stdev': 1.713334420891703e-06, 'seeds': 5}, 'Eyeglasses': {'mean': 0.01569982967638513, 'stdev': 0.0013109249360822462, 'seeds': 5}, 'Wearing_Earrings': {'mean': 0.1748722572888488, 'stdev': 0.0036206376428502204, 'seeds': 5}, 'Wearing_Necktie': {'mean': 0.04424406372107003, 'stdev': 0.0012061396624080353, 'seeds': 5}, 'Wearing_Necklace': {'mean': 0.13796212804328223, 'stdev': 0.00012270763163927629, 'seeds': 5}}
('scratch', 'beard', 7)
{'avg': {'mean': 0.9206048269709735, 'stdev': 0.03842758615918381, 'seeds': 5}, 'unif': {'mean': 0.5107778524635066, 'stdev': 0.010146012385139127, 'seeds': 5}, 'worst': {'mean': 0.9213130198122416, 'stdev': 0.03847658501446179, 'seeds': 5}, 'error': {'mean': 1.4884356988735256e-05, 'stdev': 1.2352621821603619e-06, 'seeds': 5}, 'Eyeglasses': {'mean': 0.014527602444644825, 'stdev': 0.0011796324856544048, 'seeds': 5}, 'Wearing_Earrings': {'mean': 0.17211702234245066, 'stdev': 0.004434399828647334, 'seeds': 5}, 'Wearing_Necktie': {'mean': 0.04326219817653542, 'stdev': 0.0018496589834558262, 'seeds': 5}, 'Wearing_Necklace': {'mean': 0.1377417092475704, 'stdev': 0.0002053291406864979, 'seeds': 5}}
('scratch', 'beard', 8)
{'avg': {'mean': 0.9271714062500157, 'stdev': 0.023967974003581558, 'seeds': 5}, 'unif': {'mean': 0.512298900683055, 'stdev': 0.007263138841793484, 'seeds': 5}, 'worst': {'mean': 0.92788831791459, 'stdev': 0.023997242905561586, 'seeds': 5}, 'error': {'mean': 1.2741569409664184e-05, 'stdev': 1.540273568911338e-06, 'seeds': 5}, 'Eyeglasses': {'mean': 0.013154994489530107, 'stdev': 0.0015031058803427896, 'seeds': 5}, 'Wearing_Earrings': {'mean': 0.16846007414086767, 'stdev': 0.00214750041491856, 'seeds': 5}, 'Wearing_Necktie': {'mean': 0.041749323715058614, 'stdev': 0.0011671209592965409, 'seeds': 5}, 'Wearing_Necklace': {'mean': 0.13771165213906422, 'stdev': 0.0002766596788194397, 'seeds': 5}}
('scratch', 'beard', 9)
{'avg': {'mean': 0.9235647138454788, 'stdev': 0.02730447180291941, 'seeds': 5}, 'unif': {'mean': 0.5111893285067985, 'stdev': 0.006730413288524895, 'seeds': 5}, 'worst': {'mean': 0.9242773104142211, 'stdev': 0.027340177075167827, 'seeds': 5}, 'error': {'mean': 1.2064022789549514e-05, 'stdev': 1.367158741297006e-06, 'seeds': 5}, 'Eyeglasses': {'mean': 0.01252379521090071, 'stdev': 0.0013805744694440104, 'seeds': 5}, 'Wearing_Earrings': {'mean': 0.16757839895802024, 'stdev': 0.0016117886025200081, 'seeds': 5}, 'Wearing_Necktie': {'mean': 0.04168920949804629, 'stdev': 0.0005001998163056455, 'seeds': 5}, 'Wearing_Necklace': {'mean': 0.13786193768159502, 'stdev': 0.0004007614467488232, 'seeds': 5}}
