# Supplementary material
Source: ML conference proceedings conference paper supplement (https://proceedings.neurips.cc/paper_files/paper/2022/hash/17a234c91f746d9625a75cf8a8731ee2-Abstract.html)
Supplement: Supplementary file 1 [file 17a234c91f746d9625a75cf8a8731ee2-Supplemental-Conference.zip › NeurIPS_2022_supplement/code/Homogenization-main/src/cv_global_correlations.txt]

avg avg
{'R^2': 1.0, 'linear_p': 0.0, 'linear_std_err': 0.0, 'rho': 1.0, 'spearman_p': 0.0}
avg unif
{'R^2': 0.8703673431630602, 'linear_p': 7.146515206116954e-201, 'linear_std_err': 0.01384337438295588, 'rho': 0.9297091272450873, 'spearman_p': 1.8327216477853566e-196}
avg worst
{'R^2': 0.0005384390763739665, 'linear_p': 0.6234728772375031, 'linear_std_err': 38.28151307301476, 'rho': 0.9553335326119449, 'spearman_p': 2.661712372946334e-239}
avg error
{'R^2': 0.0005296207173690304, 'linear_p': 0.6263316701964778, 'linear_std_err': 2.3899392888750117e-06, 'rho': 0.09404838324887659, 'spearman_p': 0.046158618960368776}
unif avg
{'R^2': 0.8703673431630602, 'linear_p': 7.146515206116954e-201, 'linear_std_err': 0.020902317672437432, 'rho': 0.9297091272450873, 'spearman_p': 1.8327216477853566e-196}
unif unif
{'R^2': 1.0, 'linear_p': 0.0, 'linear_std_err': 0.0, 'rho': 1.0, 'spearman_p': 0.0}
unif worst
{'R^2': 4.514089726195925e-05, 'linear_p': 0.8869770907676785, 'linear_std_err': 47.05139285618871, 'rho': 0.9622549001187132, 'spearman_p': 2.4359909978607973e-255}
unif error
{'R^2': 0.0017306341010327132, 'linear_p': 0.37863461857585334, 'linear_std_err': 2.9349588515911974e-06, 'rho': -0.020892240236851066, 'spearman_p': 0.658484193931858}
worst avg
{'R^2': 0.0005384390763739665, 'linear_p': 0.6234728772375031, 'linear_std_err': 5.827724154866668e-05, 'rho': 0.9553335326119449, 'spearman_p': 2.661712372946334e-239}
worst unif
{'R^2': 4.514089726195925e-05, 'linear_p': 0.8869770907676785, 'linear_std_err': 4.743838515118233e-05, 'rho': 0.9622549001187132, 'spearman_p': 2.4359909978607973e-255}
worst worst
{'R^2': 1.0, 'linear_p': 0.0, 'linear_std_err': 0.0, 'rho': 1.0, 'spearman_p': 0.0}
worst error
{'R^2': 0.04644532764515317, 'linear_p': 3.963241710637287e-06, 'linear_std_err': 2.880246451591507e-09, 'rho': 0.0983831000295044, 'spearman_p': 0.03695329643543112}
error avg
{'R^2': 0.0005296207173690304, 'linear_p': 0.6263316701964778, 'linear_std_err': 933.4800588561146, 'rho': 0.09404838324887659, 'spearman_p': 0.046158618960368776}
error unif
{'R^2': 0.0017306341010327132, 'linear_p': 0.37863461857585334, 'linear_std_err': 759.2201278691999, 'rho': -0.020892240236851066, 'spearman_p': 0.658484193931858}
error worst
{'R^2': 0.04644532764515317, 'linear_p': 3.963241710637287e-06, 'linear_std_err': 738988.9325671984, 'rho': 0.0983831000295044, 'spearman_p': 0.03695329643543112}
error error
{'R^2': 1.0, 'linear_p': 0.0, 'linear_std_err': 0.0, 'rho': 1.0, 'spearman_p': 0.0}
