# Supplementary material
Source: ML conference proceedings conference paper supplement (https://proceedings.neurips.cc/paper_files/paper/2022/hash/17a234c91f746d9625a75cf8a8731ee2-Abstract.html)
Supplement: Supplementary file 1 [file 17a234c91f746d9625a75cf8a8731ee2-Supplemental-Conference.zip › NeurIPS_2022_supplement/code/Homogenization-main/src/firstnames.csv]

firstname	obs	pcthispanic	pctwhite	pctblack	pctapi	pctaian	pct2prace
AARON	3646	2.88	91.607	3.264	2.057	0.055	0.137
ABBAS	59	0	71.186	3.39	25.424	0	0
ABBEY	57	0	96.491	3.509	0	0	0
ABBIE	74	1.351	95.946	2.703	0	0	0
ABBY	262	1.527	94.656	1.527	2.29	0	0
ABDUL	221	0.452	44.344	6.787	47.511	0.452	0.452
ABDULLAH	44	2.273	65.909	9.091	22.727	0	0
ABE	31	6.452	77.419	12.903	3.226	0	0
ABEL	327	82.569	12.844	2.141	2.446	0	0
ABELARDO	76	78.947	9.211	0	11.842	0	0
ABHIJIT	34	0	17.647	0	82.353	0	0
ABHISHEK	18	0	0	0	100	0	0
ABIGAIL	418	12.201	81.579	1.435	4.785	0	0
ABNER	41	39.024	34.146	12.195	14.634	0	0
ABRAHAM	413	30.751	47.7	7.748	12.349	1.453	0
ABRAM	43	9.302	81.395	6.977	2.326	0	0
ADA	199	30.653	53.266	7.035	8.543	0.503	0
ADALBERTO	69	94.203	5.797	0	0	0	0
ADAM	4725	1.989	96.148	0.635	1.016	0.085	0.127
ADAN	146	91.781	5.479	2.055	0.685	0	0
ADDIE	49	2.041	67.347	26.531	2.041	2.041	0
ADEL	77	9.091	71.429	5.195	14.286	0	0
ADELA	122	63.115	28.689	0	8.197	0	0
ADELAIDA	44	52.273	13.636	0	34.091	0	0
ADELAIDE	41	12.195	75.61	12.195	0	0	0
ADELE	193	0.518	93.782	2.591	2.591	0	0.518
ADELINA	62	62.903	25.806	1.613	8.065	1.613	0
ADELINE	66	10.606	65.152	7.576	15.152	0	1.515
ADINA	55	3.636	89.091	5.455	1.818	0	0
ADMIR	15	0	100	0	0	0	0
ADNAN	66	0	66.667	1.515	30.303	1.515	0
ADOLFO	179	87.151	10.056	0.559	2.235	0	0
ADOLPH	44	11.364	72.727	15.909	0	0	0
ADRIA	40	10	90	0	0	0	0
ADRIAN	865	36.301	49.249	11.098	2.659	0.347	0.347
ADRIANA	489	62.372	35.992	0.818	0.613	0.204	0
ADRIANE	58	6.897	75.862	15.517	1.724	0	0
ADRIANNA	30	43.333	50	3.333	3.333	0	0
ADRIANNE	95	3.158	89.474	6.316	1.053	0	0
ADRIENNE	644	2.019	83.385	12.733	1.553	0.155	0.155
AFSHIN	37	0	83.784	0	13.514	0	2.703
AGATA	48	2.083	97.917	0	0	0	0
AGATHA	36	2.778	61.111	16.667	16.667	2.778	0
AGNES	352	3.125	67.898	10.795	17.614	0.568	0
AGNIESZKA	104	1.923	96.154	0.962	0.962	0	0
AGUSTIN	239	89.958	5.858	0.418	3.766	0	0
AHMAD	163	0.613	67.485	3.681	26.38	1.227	0.613
AHMED	176	1.136	65.341	8.523	22.727	0	2.273
AHMET	32	6.25	90.625	0	3.125	0	0
AI	31	3.226	9.677	0	87.097	0	0
AIDA	214	45.794	37.85	0.935	15.421	0	0
AILEEN	186	9.14	65.591	2.151	22.581	0	0.538
AIMEE	611	2.782	93.453	0.327	3.11	0.164	0.164
AISHA	72	5.556	25	59.722	9.722	0	0
AJAY	154	0.649	25.325	0.649	70.779	1.948	0.649
AJIT	68	1.471	20.588	0	77.941	0	0
AKBAR	31	0	48.387	0	51.613	0	0
AKIKO	33	3.03	27.273	3.03	66.667	0	0
AL	92	5.435	73.913	10.87	8.696	1.087	0
ALAIN	114	14.035	66.667	10.526	7.895	0	0.877
ALAINA	55	1.818	94.545	1.818	1.818	0	0
ALAN	4795	1.502	92.471	1.064	4.797	0.104	0.063
ALANA	153	5.229	84.967	8.497	1.307	0	0
ALANE	22	0	100	0	0	0	0
ALANNA	53	0	96.226	0	1.887	1.887	0
ALASTAIR	18	0	100	0	0	0	0
ALBA	113	82.301	16.814	0	0.885	0	0
ALBERT	2425	9.526	75.093	7.464	7.546	0.206	0.165
ALBERTA	132	7.576	62.879	27.273	2.273	0	0
ALBERTO	674	81.306	11.128	0.445	6.825	0.297	0
ALDEN	38	7.895	78.947	2.632	10.526	0	0
ALDO	114	58.772	37.719	0	3.509	0	0
ALEC	109	0	89.908	1.835	8.257	0	0
ALECIA	89	2.247	78.652	16.854	0	2.247	0
ALEJANDRA	183	87.978	8.743	0	3.279	0	0
ALEJANDRO	821	90.134	6.943	0.122	2.801	0	0
ALEKSANDAR	30	0	100	0	0	0	0
ALEKSANDER	33	0	96.97	0	0	0	3.03
ALEKSANDR	185	0.541	98.378	0	1.081	0	0
ALEKSANDRA	47	0	100	0	0	0	0
ALEKSEY	53	0	96.226	0	3.774	0	0
ALEN	31	3.226	90.323	0	6.452	0	0
ALENA	58	1.724	86.207	8.621	3.448	0	0
ALENE	31	0	87.097	6.452	3.226	0	3.226
ALESHA	36	2.778	80.556	16.667	0	0	0
ALESIA	49	6.122	61.224	32.653	0	0	0
ALESSANDRA	34	8.824	91.176	0	0	0	0
ALESSANDRO	46	4.348	89.13	2.174	4.348	0	0
ALETA	49	2.041	89.796	8.163	0	0	0
ALEX	1371	18.964	64.406	3.136	12.983	0.219	0.292
ALEXA	78	2.564	94.872	2.564	0	0	0
ALEXANDER	2247	8.678	81.531	2.759	6.631	0.134	0.267
ALEXANDR	18	0	100	0	0	0	0
ALEXANDRA	504	10.714	85.516	1.19	1.984	0.198	0.397
ALEXANDRE	80	10	83.75	2.5	3.75	0	0
ALEXANDRIA	92	7.609	84.783	2.174	4.348	1.087	0
ALEXANDRU	31	6.452	93.548	0	0	0	0
ALEXEI	30	0	100	0	0	0	0
ALEXEY	21	0	100	0	0	0	0
ALEXIA	38	0	86.842	10.526	2.632	0	0
ALEXIS	452	14.159	77.655	5.088	2.876	0	0.221
ALF	15	0	100	0	0	0	0
ALFONSO	482	78.216	13.071	3.942	4.564	0	0.207
ALFRED	1237	10.186	75.829	9.054	4.689	0.081	0.162
ALFREDA	35	2.857	22.857	71.429	2.857	0	0
ALFREDO	687	80.64	10.771	0.728	7.86	0	0
ALI	514	1.946	72.763	4.28	19.455	0.973	0.584
ALIA	30	6.667	73.333	3.333	16.667	0	0
ALICE	1923	4.888	80.135	6.292	8.164	0.208	0.312
ALICIA	1719	24.375	66.667	5.934	2.734	0.116	0.175
ALICJA	31	0	100	0	0	0	0
ALIDA	34	23.529	73.529	2.941	0	0	0
ALINA	137	21.168	72.993	2.19	3.65	0	0
ALINE	58	1.724	81.034	10.345	6.897	0	0
ALIREZA	73	1.37	93.151	0	5.479	0	0
ALISA	338	2.071	86.686	7.396	3.846	0	0
ALISHA	213	3.286	84.977	10.329	0.469	0.469	0.469
ALISON	1403	0.784	96.294	1.283	1.568	0	0.071
ALISSA	224	1.339	95.536	1.786	0.893	0.446	0
ALISTAIR	26	0	100	0	0	0	0
ALIX	37	5.405	75.676	13.514	2.703	0	2.703
ALIZA	33	6.061	81.818	9.091	0	3.03	0
ALKA	36	0	16.667	0	80.556	2.778	0
ALLA	126	0.794	99.206	0	0	0	0
ALLAN	1113	2.066	88.23	1.887	7.457	0.09	0.27
ALLEN	1912	1.046	88.755	4.498	5.178	0.052	0.471
ALLENE	31	0	70.968	22.581	6.452	0	0
ALLISON	1774	0.62	95.378	1.917	1.917	0	0.169
ALLYN	57	5.263	91.228	3.509	0	0	0
ALLYSON	255	0	96.078	3.137	0.784	0	0
ALMA	611	56.137	31.588	7.201	5.074	0	0
ALOK	36	0	22.222	2.778	72.222	2.778	0
ALON	33	0	90.909	3.03	6.061	0	0
ALONSO	51	82.353	13.725	1.961	1.961	0	0
ALONZO	81	18.519	34.568	44.444	2.469	0	0
ALPHONSE	49	2.041	83.673	14.286	0	0	0
ALPHONSO	56	7.143	14.286	76.786	1.786	0	0
ALTA	47	0	91.489	6.383	2.128	0	0
ALTAGRACIA	43	90.698	6.977	0	2.326	0	0
ALTHEA	77	2.597	41.558	50.649	5.195	0	0
ALTON	127	0.787	74.016	22.047	2.362	0.787	0
ALVA	71	25.352	53.521	15.493	5.634	0	0
ALVARO	272	87.132	12.5	0	0.368	0	0
ALVIN	595	3.866	62.353	21.008	12.773	0	0
ALYCE	103	1.942	90.291	6.796	0.971	0	0
ALYCIA	51	3.922	88.235	7.843	0	0	0
ALYSE	25	0	100	0	0	0	0
ALYSIA	33	0	100	0	0	0	0
ALYSON	193	1.036	96.373	1.554	1.036	0	0
ALYSSA	321	4.673	91.9	0.312	2.804	0	0.312
AMADO	64	68.75	4.688	0	26.563	0	0
AMADOR	35	80	5.714	0	14.286	0	0
AMAL	52	0	67.308	7.692	25	0	0
AMALIA	111	57.658	34.234	0	7.207	0.901	0
AMANDA	4395	3.14	94.312	1.206	0.933	0.205	0.205
AMAR	43	2.326	46.512	2.326	48.837	0	0
AMARJIT	45	2.222	15.556	0	82.222	0	0
AMBER	1557	1.863	95.055	1.991	0.771	0.193	0.128
AMELIA	439	22.096	61.731	5.467	10.706	0	0
AMER	33	0	66.667	0	33.333	0	0
AMI	115	0.87	81.739	4.348	13.043	0	0
AMIE	220	1.364	92.727	3.636	2.273	0	0
AMIN	52	5.769	59.615	7.692	25	1.923	0
AMINA	30	0	46.667	26.667	26.667	0	0
AMIR	209	1.914	75.598	2.392	18.182	0.478	1.435
AMIT	233	0	24.893	0.429	73.82	0.858	0
AMITA	46	0	26.087	0	67.391	6.522	0
AMOS	103	7.767	65.049	22.33	4.854	0	0
AMPARO	87	86.207	8.046	0	5.747	0	0
AMY	9775	0.992	95.56	0.358	2.844	0.143	0.102
AN	111	0	3.604	0	96.396	0	0
ANA	1656	73.249	23.43	0.906	2.295	0	0.121
ANABEL	49	83.673	12.245	0	4.082	0	0
ANAND	137	0.73	21.898	0	74.453	2.92	0
ANASTASIA	157	0.637	94.904	2.548	1.274	0	0.637
ANATOLIY	84	0	100	0	0	0	0
ANATOLY	42	0	97.619	0	2.381	0	0
ANCA	19	0	100	0	0	0	0
ANDERS	53	0	98.113	0	1.887	0	0
ANDERSON	47	19.149	31.915	34.043	14.894	0	0
ANDRA	68	0	89.706	8.824	0	1.471	0
ANDRE	599	5.509	56.928	33.723	3.339	0.167	0.334
ANDREA	4215	4.27	89.751	4.911	0.807	0.214	0.047
ANDREAS	164	0.61	95.732	1.829	1.829	0	0
ANDREI	78	2.564	92.308	2.564	2.564	0	0
ANDRES	482	83.817	12.656	0.415	2.905	0.207	0
ANDREW	10945	1.882	93.212	1.69	3.07	0.11	0.037
ANDREY	114	0.877	97.368	0	1.754	0	0
ANDRIA	60	3.333	80	11.667	5	0	0
ANDRIY	34	0	100	0	0	0	0
ANDRZEJ	177	0	100	0	0	0	0
ANDY	555	6.306	52.793	1.622	38.559	0.721	0
ANETA	49	0	100	0	0	0	0
ANGEL	888	69.144	22.635	3.716	4.279	0.225	0
ANGELA	6432	4.851	85.619	7.167	1.975	0.187	0.202
ANGELIA	100	4	74	20	1	0	1
ANGELICA	453	71.302	24.724	0.442	3.311	0.221	0
ANGELIKA	46	0	91.304	0	8.696	0	0
ANGELINA	292	34.247	50.342	3.425	10.959	0.685	0.342
ANGELINE	101	0.99	79.208	3.96	15.842	0	0
ANGELIQUE	139	5.036	77.698	15.108	2.158	0	0
ANGELITA	86	39.535	16.279	4.651	38.372	0	1.163
ANGELO	486	10.494	84.774	3.086	1.44	0.206	0
ANGIE	379	10.29	77.573	2.639	9.499	0	0
ANGUS	43	0	95.349	0	4.651	0	0
ANH	184	0.543	4.348	0	95.109	0	0
ANI	44	2.273	81.818	4.545	11.364	0	0
ANIBAL	54	88.889	11.111	0	0	0	0
ANIL	215	0.93	18.14	0.93	79.535	0	0.465
ANILA	30	0	46.667	0	50	3.333	0
ANISSA	49	2.041	79.592	16.327	2.041	0	0
ANITA	2003	6.64	76.835	7.738	8.288	0.399	0.1
ANJA	35	2.857	91.429	5.714	0	0	0
ANJALI	51	0	23.529	0	76.471	0	0
ANJANA	33	0	24.242	0	75.758	0	0
ANJANETTE	34	5.882	67.647	26.471	0	0	0
ANJU	33	0	15.152	0	81.818	3.03	0
ANKUR	33	3.03	12.121	3.03	81.818	0	0
ANN	5151	0.912	94.855	1.573	2.446	0.097	0.116
ANNA	3347	7.439	84.762	2.211	5.378	0.09	0.12
ANNABEL	32	21.875	59.375	9.375	9.375	0	0
ANNABELLE	70	5.714	70	1.429	21.429	0	1.429
ANNALISA	38	0	94.737	2.632	2.632	0	0
ANNAMARIA	37	16.216	81.081	0	2.703	0	0
ANNAMARIE	68	10.294	86.765	0	1.471	1.471	0
ANNE	4239	0.731	96.037	0.896	2.147	0.142	0.047
ANNELIESE	32	3.125	96.875	0	0	0	0
ANNEMARIE	164	0	97.561	1.829	0.61	0	0
ANNETTA	48	2.083	75	18.75	2.083	2.083	0
ANNETTE	1679	6.135	82.37	9.708	1.549	0.179	0.06
ANNIE	654	3.517	44.954	30.887	20.031	0.153	0.459
ANNMARIE	188	1.596	94.681	3.191	0.532	0	0
ANSELMO	45	71.111	22.222	0	6.667	0	0
ANSON	36	0	58.333	2.778	38.889	0	0
ANTHONY	10335	5.099	84.161	7.199	3.154	0.174	0.213
ANTJE	19	0	100	0	0	0	0
ANTOINE	104	2.885	53.846	40.385	2.885	0	0
ANTOINETTE	505	5.941	76.238	15.446	1.584	0.198	0.594
ANTON	184	1.087	89.13	5.978	3.261	0.543	0
ANTONELLA	36	0	97.222	0	0	2.778	0
ANTONETTE	44	6.818	81.818	9.091	2.273	0	0
ANTONIA	273	47.253	42.491	5.495	3.663	0.733	0.366
ANTONIETTA	34	2.941	94.118	0	2.941	0	0
ANTONINA	37	5.405	81.081	0	13.514	0	0
ANTONINO	43	27.907	69.767	0	2.326	0	0
ANTONIO	1965	56.336	31.603	5.242	6.616	0	0.204
ANTONY	96	1.042	77.083	4.167	16.667	1.042	0
ANUP	34	0	17.647	0	82.353	0	0
ANURADHA	60	0	10	0	90	0	0
ANWAR	37	0	40.541	10.811	45.946	0	2.703
APARNA	44	0	22.727	0	77.273	0	0
APRIL	1662	2.708	88.448	6.739	1.685	0.301	0.12
ARA	58	0	94.828	1.724	3.448	0	0
ARACELI	191	84.817	8.901	0	5.759	0.524	0
ARACELY	49	93.878	6.122	0	0	0	0
ARAM	38	2.632	94.737	0	2.632	0	0
ARASH	33	3.03	75.758	0	18.182	0	3.03
ARCELIA	40	87.5	12.5	0	0	0	0
ARCHANA	50	0	16	0	82	2	0
ARCHIE	134	2.239	63.433	29.104	2.985	0	2.239
ARDEN	52	0	84.615	13.462	1.923	0	0
ARDIS	31	0	96.774	3.226	0	0	0
ARI	72	2.778	91.667	0	5.556	0	0
ARIANA	45	33.333	60	0	4.444	0	2.222
ARIANNE	32	6.25	87.5	6.25	0	0	0
ARIC	56	3.571	92.857	1.786	1.786	0	0
ARIE	31	3.226	87.097	6.452	3.226	0	0
ARIEL	186	40.86	45.699	2.151	11.29	0	0
ARIF	36	2.778	30.556	0	66.667	0	0
ARKADIUSZ	27	0	100	0	0	0	0
ARKADY	23	0	100	0	0	0	0
ARLA	16	0	100	0	0	0	0
ARLEEN	98	2.041	85.714	6.122	6.122	0	0
ARLEN	46	2.174	97.826	0	0	0	0
ARLENE	878	4.67	84.852	5.581	4.67	0.228	0
ARLETTE	30	10	66.667	16.667	6.667	0	0
ARLIE	20	0	100	0	0	0	0
ARLINE	43	4.651	86.047	2.326	6.977	0	0
ARLYN	34	5.882	79.412	2.941	11.765	0	0
ARMAND	77	3.896	85.714	1.299	9.091	0	0
ARMANDO	803	84.06	9.838	0.249	5.729	0.125	0
ARMEN	87	2.299	94.253	0	3.448	0	0
ARMIDA	42	76.19	21.429	0	2.381	0	0
ARMIN	31	0	93.548	0	6.452	0	0
ARNALDO	37	67.568	18.919	0	13.514	0	0
ARNE	42	0	92.857	7.143	0	0	0
ARNEL	37	2.703	16.216	0	81.081	0	0
ARNO	20	0	100	0	0	0	0
ARNOLD	615	7.48	78.211	7.317	6.992	0	0
ARNOLDO	55	94.545	5.455	0	0	0	0
ARNULFO	98	89.796	2.041	0	8.163	0	0
ARON	87	4.598	91.954	1.149	2.299	0	0
ARSEN	19	0	100	0	0	0	0
ARSENIO	37	35.135	32.432	2.703	29.73	0	0
ART	84	16.667	67.857	4.762	10.714	0	0
ARTEMIO	54	75.926	1.852	0	22.222	0	0
ARTHUR	2902	6.168	83.115	7.099	3.377	0.103	0.138
ARTI	35	5.714	31.429	2.857	60	0	0
ARTUR	71	2.817	95.775	0	0	1.408	0
ARTURO	715	87.133	7.972	0	4.755	0	0.14
ARUN	131	0.763	25.954	0.763	71.756	0.763	0
ARUNA	42	0	23.81	0	73.81	2.381	0
ARVIN	36	13.889	61.111	0	25	0	0
ARVIND	73	0	27.397	0	69.863	2.74	0
ASA	36	2.778	86.111	11.111	0	0	0
ASHA	82	0	19.512	8.537	71.951	0	0
ASHISH	118	0	15.254	0	84.746	0	0
ASHLEE	114	0.877	97.368	1.754	0	0	0
ASHLEIGH	88	1.136	96.591	2.273	0	0	0
ASHLEY	2333	1.629	93.699	3.601	0.986	0.086	0
ASHLIE	38	7.895	92.105	0	0	0	0
ASHOK	169	0.592	18.343	0	79.29	1.183	0.592
ASHRAF	55	0	81.818	0	18.182	0	0
ASHTON	34	0	82.353	14.706	0	2.941	0
ASHWIN	38	2.632	34.211	0	60.526	0	2.632
ASIF	39	2.564	33.333	0	64.103	0	0
ASIM	31	0	41.935	0	54.839	3.226	0
ASMA	33	0	36.364	3.03	57.576	3.03	0
ASTRID	60	16.667	75	1.667	6.667	0	0
ATHANASIOS	38	0	100	0	0	0	0
ATHENA	102	6.863	85.294	3.922	3.922	0	0
ATUL	65	0	15.385	0	84.615	0	0
AUBREY	196	1.531	84.184	10.714	3.061	0.51	0
AUDRA	190	4.737	87.895	6.842	0	0.526	0
AUDREY	1008	1.786	84.722	10.714	2.381	0.298	0.099
AUGUST	132	2.273	96.212	0	1.515	0	0
AUGUSTIN	33	48.485	33.333	12.121	6.061	0	0
AUGUSTINE	88	26.136	36.364	23.864	13.636	0	0
AUGUSTO	70	55.714	21.429	1.429	21.429	0	0
AUGUSTUS	37	0	72.973	21.622	5.405	0	0
AURA	61	65.574	27.869	1.639	4.918	0	0
AUREA	32	62.5	6.25	0	31.25	0	0
AURELIA	69	44.928	46.377	4.348	4.348	0	0
AURELIO	111	81.081	13.514	0	5.405	0	0
AURORA	204	50.98	25.98	2.451	20.588	0	0
AUSTIN	394	0.254	89.086	5.076	5.076	0	0.508
AUTUMN	164	1.22	95.732	1.829	1.22	0	0
AVA	110	3.636	69.091	19.091	6.364	0	1.818
AVELINO	32	53.125	9.375	0	37.5	0	0
AVERY	87	0	73.563	24.138	2.299	0	0
AVI	37	5.405	91.892	0	2.703	0	0
AVIS	48	0	66.667	33.333	0	0	0
AVIVA	34	0	100	0	0	0	0
AXEL	33	24.242	66.667	9.091	0	0	0
AYANNA	15	0	0	100	0	0	0
AZIZ	44	2.273	68.182	6.818	22.727	0	0
AZUCENA	42	80.952	9.524	0	9.524	0	0
BA	18	0	0	0	100	0	0
BABAK	34	0	91.176	2.941	5.882	0	0
BABETTE	34	0	94.118	0	5.882	0	0
BAHMAN	31	0	83.871	3.226	9.677	0	3.226
BAHRAM	36	0	91.667	0	8.333	0	0
BAILEY	45	0	97.778	0	2.222	0	0
BALAJI	47	2.128	12.766	2.128	80.851	2.128	0
BALDEV	33	0	30.303	0	63.636	6.061	0
BALTAZAR	53	86.792	3.774	1.887	7.547	0	0
BALWINDER	33	0	24.242	0	75.758	0	0
BAMBI	46	0	95.652	2.174	2.174	0	0
BAO	111	0	1.802	0	96.396	0.901	0.901
BARBARA	12854	1.626	93.068	4.551	0.583	0.093	0.078
BARBRA	66	3.03	92.424	4.545	0	0	0
BARNEY	65	4.615	76.923	9.231	9.231	0	0
BARRETT	91	0	96.703	2.198	1.099	0	0
BARRIE	41	0	100	0	0	0	0
BARRON	31	0	70.968	25.806	0	3.226	0
BARRY	2515	0.596	95.149	2.903	1.034	0.119	0.199
BART	279	0.717	96.774	0.717	1.792	0	0
BARTHOLOMEW	47	2.128	78.723	14.894	2.128	0	2.128
BARTLEY	32	0	100	0	0	0	0
BARTON	152	1.316	98.026	0	0.658	0	0
BASIL	76	1.316	90.789	7.895	0	0	0
BASSAM	53	0	88.679	0	9.434	1.887	0
BAXTER	15	0	100	0	0	0	0
BEATA	81	0	96.296	0	3.704	0	0
BEATE	31	0	96.774	0	3.226	0	0
BEATRICE	368	14.13	61.957	19.293	3.804	0.815	0
BEATRIZ	267	79.026	16.479	0.749	3.745	0	0
BEAU	150	0	98	0	1.333	0	0.667
BECKIE	21	0	100	0	0	0	0
BECKY	769	2.081	93.498	0.78	3.511	0	0.13
BELEN	48	56.25	18.75	2.083	22.917	0	0
BELINDA	542	10.148	70.295	14.207	4.613	0	0.738
BELLA	63	3.175	74.603	1.587	19.048	0	1.587
BEN	634	3.312	77.129	3.628	15.615	0	0.315
BENEDETTO	24	0	100	0	0	0	0
BENEDICT	96	4.167	64.583	6.25	23.958	0	1.042
BENIGNO	30	80	3.333	0	16.667	0	0
BENITA	95	18.947	49.474	23.158	8.421	0	0
BENITO	136	80.147	8.824	0.735	10.294	0	0
BENJAMIN	4232	6.876	85.184	2.906	4.679	0.165	0.189
BENNETT	115	0	91.304	4.348	4.348	0	0
BENNIE	148	4.73	61.486	32.432	0.676	0	0.676
BENNY	211	9.005	61.611	5.687	21.327	1.422	0.948
BENSON	47	0	40.426	6.383	53.191	0	0
BENTON	39	2.564	89.744	0	5.128	2.564	0
BERNABE	31	70.968	3.226	0	25.806	0	0
BERNADETTE	672	8.482	75	8.929	6.845	0.298	0.446
BERNADINE	100	4	75	17	4	0	0
BERNARD	1244	1.768	84.486	10.209	3.376	0	0.161
BERNARDINO	35	74.286	14.286	0	11.429	0	0
BERNARDO	133	72.18	9.023	2.256	16.541	0	0
BERNHARD	54	0	98.148	0	1.852	0	0
BERNICE	319	5.956	65.204	26.332	2.508	0	0
BERNIE	78	11.538	70.513	5.128	12.821	0	0
BERT	198	1.01	89.899	1.01	8.081	0	0
BERTA	60	56.667	38.333	3.333	1.667	0	0
BERTHA	439	61.503	25.285	12.073	0.911	0.228	0
BERTRAM	45	0	60	31.111	8.889	0	0
BERTRAND	41	2.439	68.293	19.512	7.317	0	2.439
BERYL	66	0	86.364	9.091	3.03	1.515	0
BESSIE	122	4.098	49.18	40.984	5.738	0	0
BETH	2511	0.518	98.566	0.358	0.438	0	0.119
BETHANN	41	0	100	0	0	0	0
BETHANNE	27	0	100	0	0	0	0
BETHANY	599	0.668	96.995	1.169	0.668	0.167	0.334
BETSY	503	3.976	91.451	1.59	2.783	0.199	0
BETTE	162	1.235	96.914	1.235	0.617	0	0
BETTIE	88	1.136	64.773	31.818	1.136	1.136	0
BETTINA	90	6.667	80	8.889	3.333	1.111	0
BETTY	2875	2.957	82.296	10.47	3.965	0.139	0.174
BETTYE	78	0	57.692	41.026	0	1.282	0
BEULAH	35	0	65.714	31.429	2.857	0	0
BEVERLEY	104	0.962	87.5	9.615	0.962	0	0.962
BEVERLY	2997	1.535	87.855	9.142	1.134	0.133	0.2
BHARAT	79	0	21.519	0	77.215	1.266	0
BHAVNA	37	2.703	21.622	0	75.676	0	0
BHUPINDER	31	0	22.581	6.452	64.516	6.452	0
BIANCA	113	34.513	58.407	6.195	0.885	0	0
BIBI	54	5.556	33.333	3.704	53.704	1.852	1.852
BIJAN	37	0	86.486	0	13.514	0	0
BILL	590	2.712	83.898	2.712	10.339	0.169	0.169
BILLIE	456	2.193	89.912	5.921	1.096	0.219	0.658
BILLY	1274	2.983	84.301	7.849	4.003	0.392	0.471
BIN	95	0	3.158	0	96.842	0	0
BINA	32	3.125	25	0	62.5	9.375	0
BING	97	2.062	6.186	0	91.753	0	0
BINH	142	1.408	4.225	0	94.366	0	0
BIPIN	32	0	34.375	3.125	56.25	6.25	0
BIRGIT	42	0	97.619	0	2.381	0	0
BIRGITTA	23	0	100	0	0	0	0
BJORN	41	0	100	0	0	0	0
BLAINE	203	0	97.537	1.478	0.493	0.493	0
BLAIR	271	0.369	97.048	2.214	0.369	0	0
BLAISE	34	0	88.235	8.824	2.941	0	0
BLAKE	567	0.705	97.002	1.058	1.235	0	0
BLANCA	489	91.207	7.975	0.204	0.613	0	0
BLANCHE	91	1.099	80.22	13.187	2.198	2.198	1.099
BLAS	32	93.75	6.25	0	0	0	0
BLYTHE	37	2.703	94.595	0	2.703	0	0
BO	134	0	24.627	0	73.881	0.746	0.746
BOB	256	1.172	85.547	2.734	10.156	0.391	0
BOBBI	179	1.676	97.207	0	0.559	0	0.559
BOBBIE	407	1.72	80.835	15.725	0.491	0.737	0.491
BOBBY	1129	2.923	78.122	13.729	4.252	0.354	0.62
BOGDAN	79	0	98.734	0	1.266	0	0
BOGUSLAW	22	0	100	0	0	0	0
BOHDAN	28	0	100	0	0	0	0
BONG	35	0	5.714	0	94.286	0	0
BONIFACIO	53	69.811	3.774	0	24.528	0	1.887
BONITA	309	1.294	86.084	11.65	0.971	0	0
BONNI	18	0	100	0	0	0	0
BONNIE	2864	0.803	96.683	1.047	1.327	0.07	0.07
BONNY	63	0	95.238	1.587	3.175	0	0
BORIS	280	4.643	91.429	2.857	1.071	0	0
BOYD	190	0.526	96.316	1.579	1.053	0	0.526
BOZENA	69	0	100	0	0	0	0
BRAD	1434	0.349	97.908	0.976	0.349	0.418	0
BRADD	16	0	100	0	0	0	0
BRADEN	66	0	98.485	0	0	1.515	0
BRADFORD	570	0.526	96.14	1.754	1.579	0	0
BRADLEY	3619	0.221	98.867	0.193	0.525	0.138	0.055
BRADLY	71	1.408	98.592	0	0	0	0
BRADY	202	1.485	93.069	3.96	1.485	0	0
BRANDEN	50	2	96	0	0	0	2
BRANDI	537	2.607	90.875	5.773	0.372	0	0.372
BRANDIE	75	0	94.667	4	1.333	0	0
BRANDON	2681	1.678	91.981	3.767	2.126	0.298	0.149
BRANDT	56	0	98.214	1.786	0	0	0
BRANDY	517	3.482	90.716	3.482	0.967	0.387	0.967
BRANKO	20	0	100	0	0	0	0
BRANNON	25	0	100	0	0	0	0
BRANT	96	0	97.917	2.083	0	0	0
BREANNA	49	2.041	93.878	4.082	0	0	0
BREANNE	52	1.923	90.385	1.923	1.923	3.846	0
BREE	42	0	95.238	4.762	0	0	0
BRENDA	5117	4.886	84.464	9.126	1.114	0.195	0.215
BRENDAN	524	0.763	97.901	0.191	0.954	0.191	0
BRENDON	64	1.563	92.188	4.688	0	0	1.563
BRENNA	81	1.235	98.765	0	0	0	0
BRENNAN	61	1.639	95.082	1.639	1.639	0	0
BRENT	2108	0.806	97.249	0.996	0.712	0.19	0.047
BRENTON	61	0	95.082	4.918	0	0	0
BRET	417	0.24	98.321	1.199	0	0.24	0
BRETT	1951	0.359	98.36	0.871	0.256	0.103	0.051
BRIAN	18306	0.716	96.182	1.338	1.59	0.098	0.076
BRIANA	102	6.863	91.176	0.98	0.98	0	0
BRIANNA	104	2.885	95.192	0.962	0.962	0	0
BRIANNE	93	1.075	98.925	0	0	0	0
BRICE	84	0	97.619	0	2.381	0	0
BRIDGET	779	1.412	92.94	5.006	0.642	0	0
BRIDGETT	64	1.563	82.813	15.625	0	0	0
BRIDGETTE	130	2.308	72.308	23.846	0.769	0.769	0
BRIDGIT	17	0	100	0	0	0	0
BRIEN	40	2.5	92.5	2.5	2.5	0	0
BRIENNE	15	0	100	0	0	0	0
BRIGETTE	37	5.405	86.486	8.108	0	0	0
BRIGID	77	1.299	97.403	0	0	0	1.299
BRIGIDA	32	40.625	25	3.125	28.125	0	3.125
BRIGITTE	176	1.705	90.341	3.977	3.977	0	0
BRIJESH	15	0	0	0	100	0	0
BRION	34	2.941	91.176	2.941	2.941	0	0
BRITA	15	0	100	0	0	0	0
BRITNEY	53	1.887	92.453	5.66	0	0	0
BRITT	99	1.01	96.97	2.02	0	0	0
BRITTA	55	0	100	0	0	0	0
BRITTANY	569	0.703	95.079	3.339	0.879	0	0
BRITTNEY	144	1.389	93.056	3.472	0.694	1.389	0
BRITTON	57	0	98.246	1.754	0	0	0
BROCK	164	0.61	97.561	1.22	0	0	0.61
BRODIE	17	0	100	0	0	0	0
BRODY	22	0	100	0	0	0	0
BRONWYN	33	0	100	0	0	0	0
BROOK	118	0	97.458	2.542	0	0	0
BROOKE	744	0.672	97.312	1.344	0.403	0.134	0.134
BROOKS	151	0	99.338	0	0.662	0	0
BRUCE	5348	0.617	95.568	2.113	1.384	0.206	0.112
BRUNO	148	18.919	80.405	0.676	0	0	0
BRYAN	3686	1.356	93.625	2.116	2.821	0.027	0.054
BRYANT	187	4.278	73.262	15.508	6.952	0	0
BRYCE	236	0.847	95.763	0.847	2.542	0	0
BRYN	36	5.556	91.667	0	2.778	0	0
BRYNN	30	0	100	0	0	0	0
BRYON	160	0	93.125	5.625	0.625	0	0.625
BRYSON	34	0	94.118	0	5.882	0	0
BUCK	18	0	100	0	0	0	0
BUD	32	3.125	93.75	0	3.125	0	0
BUDDY	65	1.538	89.231	1.538	6.154	1.538	0
BUFFY	23	0	100	0	0	0	0
BUFORD	31	0	87.097	12.903	0	0	0
BURKE	31	0	93.548	0	3.226	3.226	0
BURT	70	1.429	88.571	8.571	1.429	0	0
BURTON	150	2	90.667	4	2.667	0.667	0
BYRON	589	6.961	77.419	11.375	4.075	0.17	0
BYUNG	89	1.124	4.494	0	94.382	0	0
CADE	19	0	100	0	0	0	0
CAESAR	32	40.625	46.875	3.125	9.375	0	0
CAITLIN	200	0	97.5	0.5	2	0	0
CALE	22	0	100	0	0	0	0
CALEB	235	2.128	96.17	0.426	0.851	0.426	0
CALLIE	85	0	84.706	12.941	2.353	0	0
CALVIN	749	0.668	58.611	25.768	14.686	0.134	0.134
CAM	47	0	25.532	0	74.468	0	0
CAMELIA	33	12.121	69.697	12.121	6.061	0	0
CAMERON	553	0.542	94.937	2.532	1.627	0.362	0
CAMI	61	0	100	0	0	0	0
CAMIE	15	0	100	0	0	0	0
CAMILLA	80	0	92.5	7.5	0	0	0
CAMILLE	385	3.117	87.532	6.753	2.338	0	0.26
CAMILO	37	59.459	21.622	0	18.919	0	0
CAN	33	0	21.212	0	78.788	0	0
CANDACE	802	0.748	90.773	7.107	1.122	0.249	0
CANDELARIO	42	90.476	9.524	0	0	0	0
CANDI	37	2.703	94.595	0	0	2.703	0
CANDICE	537	2.607	86.778	6.145	3.724	0.186	0.559
CANDIDA	38	60.526	28.947	5.263	5.263	0	0
CANDIDO	34	70.588	11.765	0	17.647	0	0
CANDIS	46	2.174	86.957	8.696	2.174	0	0
CANDY	207	5.314	86.473	2.899	4.831	0.483	0
CANDYCE	31	6.452	90.323	3.226	0	0	0
CARA	473	0.634	95.56	2.326	0.846	0	0.634
CAREN	137	0	95.62	3.65	0.73	0	0
CAREY	356	0.281	96.348	1.685	1.685	0	0
CARI	195	2.051	97.436	0	0.513	0	0
CARIDAD	30	56.667	23.333	0	20	0	0
CARIE	62	0	98.387	0	1.613	0	0
CARIN	89	1.124	94.382	3.371	1.124	0	0
CARINA	64	32.813	59.375	1.563	6.25	0	0
CARISSA	121	2.479	88.43	3.306	5.785	0	0
CARL	3475	0.978	90.331	6.935	1.41	0.115	0.23
CARLA	1643	4.991	86.366	7.912	0.426	0.061	0.243
CARLEE	25	0	100	0	0	0	0
CARLEEN	75	0	93.333	4	2.667	0	0
CARLENE	137	0.73	86.861	8.029	0.73	3.65	0
CARLETON	33	0	90.909	6.061	0	3.03	0
CARLEY	26	0	100	0	0	0	0
CARLIE	32	0	100	0	0	0	0
CARLIN	31	0	87.097	6.452	6.452	0	0
CARLO	156	10.256	76.923	2.564	10.256	0	0
CARLOS	2891	82.705	13.352	1.73	2.041	0.069	0.104
CARLOTTA	56	1.786	62.5	30.357	1.786	1.786	1.786
CARLTON	281	1.068	69.039	28.826	1.068	0	0
CARLY	158	1.266	98.101	0	0.633	0	0
CARLYN	26	0	100	0	0	0	0
CARMA	28	0	100	0	0	0	0
CARMEL	75	1.333	80	12	6.667	0	0
CARMELA	170	15.882	77.647	1.176	4.706	0	0.588
CARMELITA	76	13.158	27.632	9.211	48.684	0	1.316
CARMELLA	77	6.494	87.013	5.195	1.299	0	0
CARMELO	91	34.066	50.549	2.198	12.088	1.099	0
CARMEN	1674	51.016	41.099	5.018	2.688	0.06	0.119
CARMINE	118	1.695	98.305	0	0	0	0
CAROL	9060	1.446	94.481	2.561	1.258	0.121	0.132
CAROLA	31	12.903	77.419	3.226	6.452	0	0
CAROLANN	44	4.545	90.909	4.545	0	0	0
CAROLE	1281	0.546	95.16	2.576	1.405	0	0.312
CAROLEE	53	1.887	98.113	0	0	0	0
CAROLINA	242	64.876	23.967	1.24	9.917	0	0
CAROLINE	1255	2.948	89.482	2.869	4.303	0.159	0.239
CAROLYN	4692	1.364	89.429	7.928	1.066	0.043	0.171
CAROLYNN	54	3.704	92.593	3.704	0	0	0
CARON	66	3.03	95.455	1.515	0	0	0
CARRI	60	0	98.333	0	0	0	1.667
CARRIE	2385	1.048	95.22	2.264	1.216	0.126	0.126
CARROL	37	0	83.784	16.216	0	0	0
CARROLL	191	0.524	93.717	4.188	1.047	0.524	0
CARSON	82	1.22	92.683	2.439	3.659	0	0
CARTER	140	0	93.571	5.714	0.714	0	0
CARY	423	1.418	90.78	2.128	4.965	0	0.709
CARYL	77	1.299	90.909	3.896	2.597	1.299	0
CARYN	274	1.095	96.715	0.73	1.095	0	0.365
CASANDRA	44	9.091	68.182	22.727	0	0	0
CASEY	1153	0.607	95.317	1.561	2.342	0.087	0.087
CASIMIR	31	3.226	93.548	3.226	0	0	0
CASSANDRA	655	2.748	75.725	20	1.527	0	0
CASSIDY	50	2	92	2	4	0	0
CASSIE	174	0.575	95.977	1.724	1.149	0.575	0
CATALINA	140	65	19.286	0	14.286	0.714	0.714
CATERINA	40	5	95	0	0	0	0
CATHARINE	93	2.151	95.699	1.075	1.075	0	0
CATHERINE	5852	1.555	93.319	2.341	2.563	0.154	0.068
CATHI	50	0	100	0	0	0	0
CATHIE	93	0	95.699	3.226	1.075	0	0
CATHLEEN	512	1.563	97.852	0	0.391	0	0.195
CATHRYN	177	0.565	97.175	1.13	0	0	1.13
CATHY	1856	2.047	91.756	3.071	2.909	0.054	0.162
CATRINA	52	3.846	73.077	19.231	3.846	0	0
CECELIA	224	5.357	82.143	10.268	2.232	0	0
CECIL	326	1.534	79.141	17.485	1.534	0	0.307
CECILE	97	1.031	80.412	7.216	11.34	0	0
CECILIA	704	37.358	48.011	2.273	12.074	0.142	0.142
CECILIO	35	77.143	17.143	0	5.714	0	0
CECILY	39	0	89.744	2.564	7.692	0	0
CEDRIC	132	0	27.273	62.121	9.091	0	1.515
CELESTE	387	5.943	83.463	5.943	4.393	0.258	0
CELESTINO	30	60	16.667	3.333	20	0	0
CELIA	353	40.793	51.275	2.833	4.816	0	0.283
CELINA	75	57.333	36	2.667	4	0	0
CELINE	49	6.122	81.633	4.082	8.163	0	0
CELSO	61	78.689	9.836	0	11.475	0	0
CESAR	681	83.847	7.048	0.147	8.957	0	0
CEZARY	19	0	100	0	0	0	0
CHAD	3153	0.444	97.716	0.793	0.825	0.19	0.032
CHADWICK	120	0.833	98.333	0	0.833	0	0
CHAN	67	0	10.448	0	89.552	0	0
CHANCE	73	4.11	90.411	4.11	0	1.37	0
CHANDA	58	0	63.793	22.414	13.793	0	0
CHANDLER	45	2.222	88.889	6.667	2.222	0	0
CHANDRA	194	1.031	57.216	12.371	28.866	0.515	0
CHANG	159	0.629	1.887	0	96.855	0	0.629
CHANH	24	0	0	0	100	0	0
CHANNING	16	0	100	0	0	0	0
CHANTAL	72	2.778	69.444	18.056	9.722	0	0
CHANTEL	47	6.383	80.851	12.766	0	0	0
CHANTELLE	46	2.174	78.261	13.043	6.522	0	0
CHAO	75	0	2.667	0	97.333	0	0
CHARISSA	36	5.556	86.111	2.778	5.556	0	0
CHARISSE	50	8	70	18	4	0	0
CHARITY	163	1.84	88.344	7.362	1.84	0.613	0
CHARLA	73	0	89.041	5.479	2.74	2.74	0
CHARLEEN	69	0	89.855	2.899	5.797	1.449	0
CHARLENE	1066	1.595	86.21	9.568	2.064	0.188	0.375
CHARLES	16262	1.23	91.379	5.547	1.494	0.16	0.191
CHARLEY	44	4.545	68.182	15.909	11.364	0	0
CHARLIE	366	7.104	54.372	23.224	15.027	0.273	0
CHARLOTTE	1247	1.363	89.495	6.897	1.363	0.401	0.481
CHARMAINE	146	2.74	58.904	27.397	8.904	1.37	0.685
CHASE	145	2.069	92.414	1.379	2.069	1.379	0.69
CHASITY	37	0	81.081	16.216	0	2.703	0
CHASTITY	36	5.556	86.111	8.333	0	0	0
CHAU	99	0	2.02	0	97.98	0	0
CHAUNCEY	33	0	51.515	45.455	3.03	0	0
CHEE	30	3.333	0	3.333	93.333	0	0
CHELSEA	260	1.538	95	1.154	2.308	0	0
CHELSEY	51	0	100	0	0	0	0
CHEN	53	0	7.547	0	92.453	0	0
CHENG	99	1.01	2.02	0	96.97	0	0
CHERI	442	0.905	95.701	2.715	0.679	0	0
CHERIE	401	2.743	93.017	2.244	1.995	0	0
CHERISE	31	0	61.29	35.484	3.226	0	0
CHERRI	40	0	95	2.5	2.5	0	0
CHERRIE	34	2.941	73.529	14.706	8.824	0	0
CHERRY	85	1.176	63.529	11.765	20	2.353	1.176
CHERRYL	31	0	87.097	12.903	0	0	0
CHERYL	5915	0.659	92.764	5.224	1.099	0.085	0.169
CHERYLE	63	1.587	92.063	4.762	1.587	0	0
CHERYLL	34	2.941	91.176	2.941	2.941	0	0
CHESTER	406	0.739	85.714	8.867	4.187	0.493	0
CHET	70	2.857	85.714	5.714	4.286	1.429	0
CHETAN	40	0	17.5	0	82.5	0	0
CHEUK	15	0	0	0	100	0	0
CHEYENNE	32	0	81.25	9.375	0	9.375	0
CHI	224	0	2.679	0	97.321	0	0
CHIA	39	0	2.564	0	97.436	0	0
CHIEN	39	0	0	0	100	0	0
CHIH	34	0	0	0	100	0	0
CHIN	57	1.754	1.754	0	96.491	0	0
CHING	62	0	3.226	0	96.774	0	0
CHINH	61	0	1.639	0	98.361	0	0
CHIRAG	43	0	9.302	0	88.372	0	2.326
CHITRA	31	0	12.903	0	83.871	0	3.226
CHLOE	42	4.762	80.952	4.762	9.524	0	0
CHONG	158	1.266	8.228	0.633	88.608	0	1.266
CHRIS	2500	2.2	91.68	1.6	4.28	0.12	0.12
CHRISTA	375	0.8	98.133	1.067	0	0	0
CHRISTAL	36	0	69.444	27.778	2.778	0	0
CHRISTEL	52	1.923	90.385	5.769	0	0	1.923
CHRISTEN	96	0	97.917	2.083	0	0	0
CHRISTI	259	1.544	96.525	0	1.544	0.386	0
CHRISTIAN	1473	10.794	85.064	1.833	1.969	0.068	0.272
CHRISTIANA	50	0	76	24	0	0	0
CHRISTIANE	64	4.688	95.313	0	0	0	0
CHRISTIANNE	18	0	100	0	0	0	0
CHRISTIE	534	2.247	93.258	2.434	2.06	0	0
CHRISTIN	88	1.136	97.727	0	1.136	0	0
CHRISTINA	4174	6.349	88.524	1.773	2.947	0.264	0.144
CHRISTINE	8298	1.904	93.444	1.386	3.097	0.06	0.108
CHRISTOPH	38	0	97.368	0	2.632	0	0
CHRISTOPHE	57	0	98.246	0	1.754	0	0
CHRISTOPHER	20768	1.786	94.544	1.998	1.401	0.125	0.144
CHRISTOS	62	1.613	98.387	0	0	0	0
CHRISTY	1047	1.242	94.651	1.146	2.674	0	0.287
CHRYSTAL	91	2.198	78.022	14.286	4.396	0	1.099
CHU	31	0	6.452	0	93.548	0	0
CHUAN	32	0	3.125	0	96.875	0	0
CHUCK	115	0.87	80	0.87	17.391	0	0.87
CHUN	152	0.658	2.632	0	96.711	0	0
CHUNG	161	0	1.863	0.621	97.516	0	0
CHUONG	73	0	2.74	0	97.26	0	0
CINDA	56	5.357	85.714	5.357	3.571	0	0
CINDEE	20	0	100	0	0	0	0
CINDI	120	2.5	95.833	0	1.667	0	0
CINDY	2692	3.343	89.747	0.854	5.906	0.111	0.037
CIPRIANO	43	83.721	6.977	0	9.302	0	0
CIRILO	30	76.667	3.333	0	20	0	0
CIRO	31	48.387	48.387	0	3.226	0	0
CLAIR	77	0	96.104	2.597	1.299	0	0
CLAIRE	768	1.042	94.141	1.693	2.995	0	0.13
CLARA	430	20.233	60.233	14.884	4.651	0	0
CLARE	236	1.271	94.492	1.271	2.542	0	0.424
CLARENCE	721	0.416	67.129	27.462	4.438	0.277	0.277
CLARICE	86	2.326	74.419	13.953	8.14	1.163	0
CLARISSA	117	16.239	64.957	11.111	6.838	0	0.855
CLARK	388	0.773	92.784	3.093	2.577	0	0.773
CLARKE	41	0	95.122	0	4.878	0	0
CLAUDE	369	1.355	85.366	12.737	0.271	0.271	0
CLAUDETTE	173	1.734	65.896	29.48	2.312	0	0.578
CLAUDIA	1569	30.784	64.054	3.697	1.02	0.191	0.255
CLAUDINE	102	3.922	83.333	9.804	1.961	0	0.98
CLAUDIO	130	53.077	45.385	0.769	0.769	0	0
CLAUS	20	0	100	0	0	0	0
CLAY	303	0	97.03	1.32	1.32	0	0.33
CLAYTON	595	0.336	93.613	2.689	2.689	0.336	0.336
CLEMENT	113	2.655	57.522	21.239	18.584	0	0
CLEMENTE	61	68.852	18.033	1.639	11.475	0	0
CLEO	70	7.143	60	27.143	5.714	0	0
CLEVE	20	0	100	0	0	0	0
CLEVELAND	43	0	37.209	60.465	2.326	0	0
CLIFF	118	0.847	84.746	5.932	8.475	0	0
CLIFFORD	1176	0.255	90.561	5.782	3.316	0.085	0
CLIFTON	347	0.865	74.928	20.749	2.305	0.288	0.865
CLINT	364	1.099	94.231	1.374	2.747	0.275	0.275
CLINTON	662	0.604	88.218	9.215	1.813	0	0.151
CLIVE	57	1.754	75.439	19.298	3.509	0	0
CLYDE	483	1.035	83.23	11.801	3.313	0.414	0.207
COBY	30	0	96.667	0	0	3.333	0
CODY	497	0.604	96.781	1.207	1.006	0.201	0.201
COLBY	118	0	98.305	0.847	0.847	0	0
COLE	139	0.719	94.964	3.597	0	0	0.719
COLEEN	193	1.036	94.301	2.591	1.554	0.518	0
COLEMAN	41	0	92.683	7.317	0	0	0
COLETTE	254	0.394	90.945	7.48	0.787	0	0.394
COLIN	632	0.316	94.462	3.006	2.057	0	0.158
COLLEEN	2533	0.592	97.789	0.711	0.671	0.197	0.039
COLLETTE	82	0	93.902	3.659	2.439	0	0
COLLIN	131	1.527	90.84	4.58	3.053	0	0
COLM	22	0	100	0	0	0	0
COLT	17	0	100	0	0	0	0
COLTON	35	0	100	0	0	0	0
CONCEPCION	125	79.2	7.2	0	13.6	0	0
CONCETTA	90	1.111	96.667	2.222	0	0	0
CONNIE	2534	3.236	89.976	2.013	4.578	0.118	0.079
CONOR	47	0	100	0	0	0	0
CONRAD	264	5.682	78.409	8.333	6.439	0.758	0.379
CONRADO	48	41.667	8.333	0	50	0	0
CONSTANCE	1270	1.024	91.811	5.984	0.866	0.157	0.157
CONSTANTIN	30	0	93.333	0	6.667	0	0
CONSTANTINE	100	0	98	1	1	0	0
CONSTANTINO	39	48.718	33.333	0	17.949	0	0
CONSUELO	182	75.824	14.286	1.648	8.242	0	0
CORA	167	4.79	62.275	24.551	6.587	0	1.796
CORAL	51	5.882	86.275	5.882	1.961	0	0
CORAZON	95	15.789	11.579	0	72.632	0	0
CORBETT	16	0	100	0	0	0	0
CORBIN	32	0	96.875	3.125	0	0	0
CORDELIA	37	18.919	48.649	27.027	2.703	2.703	0
CORDELL	33	0	69.697	27.273	3.03	0	0
COREY	1087	0.46	89.42	8.188	1.288	0.276	0.368
CORI	97	2.062	94.845	2.062	1.031	0	0
CORIE	30	3.333	86.667	6.667	3.333	0	0
CORINA	115	35.652	60	1.739	2.609	0	0
CORINE	36	8.333	55.556	33.333	2.778	0	0
CORINNA	64	10.938	85.938	1.563	1.563	0	0
CORINNE	387	1.809	94.057	1.55	2.584	0	0
CORNELIA	128	2.344	79.688	16.406	1.563	0	0
CORNELIO	30	60	13.333	0	23.333	0	3.333
CORNELIUS	137	1.46	68.613	29.197	0.73	0	0
CORNELL	37	5.405	27.027	64.865	0	0	2.703
CORRIE	72	4.167	94.444	0	0	0	1.389
CORRIN	18	0	100	0	0	0	0
CORRINE	132	5.303	87.879	5.303	1.515	0	0
CORT	17	0	100	0	0	0	0
CORTNEY	90	1.111	92.222	5.556	0	1.111	0
CORY	957	0.627	94.566	2.821	1.776	0.104	0.104
COSMO	22	0	100	0	0	0	0
COURTENAY	18	0	100	0	0	0	0
COURTNEY	1209	0.083	92.969	5.624	0.827	0.165	0.331
COY	41	0	90.244	4.878	4.878	0	0
CRAIG	5346	0.374	96.296	2.151	1.029	0.019	0.131
CREIGHTON	34	0	85.294	0	14.706	0	0
CRIS	47	0	89.362	0	10.638	0	0
CRISPIN	42	42.857	30.952	4.762	21.429	0	0
CRISTA	54	0	100	0	0	0	0
CRISTEN	32	0	96.875	3.125	0	0	0
CRISTI	41	7.317	92.683	0	0	0	0
CRISTIAN	109	45.872	53.211	0	0.917	0	0
CRISTIE	31	0	96.774	0	0	3.226	0
CRISTIN	59	0	100	0	0	0	0
CRISTINA	539	36.92	50.649	1.299	10.946	0	0.186
CRISTINE	62	0	95.161	0	4.839	0	0
CRISTOBAL	55	90.909	7.273	0	1.818	0	0
CRISTOPHER	33	9.091	87.879	0	3.03	0	0
CRISTY	87	1.149	94.253	0	4.598	0	0
CRUZ	108	97.222	2.778	0	0	0	0
CRYSTAL	1448	5.041	82.32	10.014	2.072	0.138	0.414
CUC	16	0	0	0	100	0	0
CUONG	170	0.588	1.176	0	97.647	0	0.588
CURT	312	0	98.397	0.321	1.282	0	0
CURTIS	1926	0.571	85.774	10.903	2.129	0.104	0.519
CURTISS	43	0	86.047	13.953	0	0	0
CYNDI	43	2.326	93.023	0	4.651	0	0
CYNTHIA	9118	3.773	89.131	4.88	1.941	0.11	0.165
CYRIL	68	1.471	67.647	13.235	17.647	0	0
CYRUS	88	1.136	78.409	12.5	7.955	0	0
DA	20	0	0	0	100	0	0
DAGOBERTO	40	100	0	0	0	0	0
DAI	36	0	8.333	0	91.667	0	0
DAISY	265	36.981	29.057	10.943	22.264	0	0.755
DALE	3068	0.489	96.415	1.858	1.043	0.098	0.098
DALENE	21	0	100	0	0	0	0
DALIA	62	45.161	48.387	4.839	1.613	0	0
DALJIT	31	0	9.677	0	83.871	6.452	0
DALLAS	210	0.476	93.81	5.238	0.476	0	0
DALTON	56	3.571	80.357	12.5	3.571	0	0
DAMARIS	59	72.881	20.339	1.695	1.695	1.695	1.695
DAMIAN	221	18.1	72.851	7.24	1.81	0	0
DAMIEN	127	3.937	82.677	9.449	3.937	0	0
DAMION	40	2.5	62.5	32.5	2.5	0	0
DAMON	427	2.342	79.157	14.52	3.279	0.234	0.468
DAN	1337	1.795	87.21	1.122	9.648	0.224	0
DANA	3064	0.751	94.941	3.427	0.685	0.098	0.098
DANE	206	0.971	95.146	0.971	2.427	0.485	0
DANELLE	70	5.714	90	4.286	0	0	0
DANETTE	133	3.759	89.474	6.015	0.752	0	0
DANG	28	0	0	0	100	0	0
DANH	34	0	2.941	0	94.118	0	2.941
DANI	58	8.621	84.483	0	5.172	1.724	0
DANIA	31	64.516	32.258	3.226	0	0	0
DANIAL	34	2.941	97.059	0	0	0	0
DANICA	35	0	97.143	2.857	0	0	0
DANIEL	20876	6.189	90.491	1.15	1.859	0.172	0.139
DANIELA	190	17.895	81.053	0.526	0.526	0	0
DANIELE	49	4.082	95.918	0	0	0	0
DANIELLA	64	15.625	68.75	12.5	1.563	0	1.563
DANIELLE	2076	1.927	93.064	4.383	0.385	0.241	0
DANILO	156	22.436	11.538	0	65.385	0.641	0
DANITA	58	0	74.138	24.138	0	1.724	0
DANN	39	2.564	92.308	0	5.128	0	0
DANNA	114	3.509	90.351	3.509	1.754	0.877	0
DANNETTE	35	0	91.429	8.571	0	0	0
DANNIE	44	2.273	88.636	9.091	0	0	0
DANNY	1948	5.801	79.774	3.542	10.318	0.257	0.308
DANTE	121	15.702	59.504	8.264	15.702	0	0.826
DANUTA	79	1.266	97.468	0	1.266	0	0
DAO	37	2.703	2.703	0	94.595	0	0
DAPHNE	204	1.961	67.647	18.137	11.765	0	0.49
DARA	138	1.449	88.406	5.797	4.348	0	0
DARBY	57	0	92.982	1.754	3.509	0	1.754
DARCI	99	2.02	95.96	0	1.01	0	1.01
DARCIE	62	1.613	95.161	0	1.613	0	1.613
DARCY	330	1.212	96.97	0.606	0.303	0.909	0
DAREK	16	0	100	0	0	0	0
DAREN	142	0	88.732	4.225	7.042	0	0
DARIA	87	5.747	88.506	5.747	0	0	0
DARIAN	37	5.405	72.973	21.622	0	0	0
DARIN	559	0.358	95.707	1.431	1.789	0.179	0.537
DARIO	101	58.416	35.644	0.99	4.95	0	0
DARIUS	74	0	64.865	32.432	2.703	0	0
DARIUSZ	76	2.632	97.368	0	0	0	0
DARKO	15	0	100	0	0	0	0
DARLA	432	1.389	96.759	1.389	0.463	0	0
DARLEEN	55	1.818	87.273	7.273	3.636	0	0
DARLENE	1674	2.867	86.738	8.781	1.254	0.299	0.06
DARNELL	73	0	17.808	82.192	0	0	0
DARON	43	2.326	86.047	9.302	2.326	0	0
DARREL	188	0	90.957	6.915	2.128	0	0
DARRELL	1178	1.104	87.267	9.762	1.188	0.424	0.255
DARREN	1238	1.131	89.984	4.604	3.877	0.242	0.162
DARRICK	52	1.923	71.154	23.077	1.923	1.923	0
DARRIN	311	0	93.248	4.18	2.572	0	0
DARRON	38	2.632	81.579	10.526	5.263	0	0
DARRYL	752	0.665	69.016	26.064	3.324	0.532	0.399
DARWIN	159	10.063	73.585	5.66	10.063	0.629	0
DARYL	699	1.001	86.552	9.156	3.147	0.143	0
DAT	58	0	1.724	0	98.276	0	0
DAVE	448	2.455	82.813	5.134	8.929	0.223	0.446
DAVID	48307	3.223	92.808	1.393	2.393	0.106	0.077
DAVIN	34	2.941	82.353	2.941	11.765	0	0
DAVINA	38	5.263	73.684	18.421	2.632	0	0
DAVIS	77	2.597	70.13	11.688	15.584	0	0
DAWN	3977	0.855	95.147	3.017	0.779	0.126	0.075
DAWNA	66	0	96.97	3.03	0	0	0
DAWNE	34	2.941	76.471	17.647	0	0	2.941
DAX	32	3.125	93.75	0	3.125	0	0
DAYLE	43	0	93.023	0	6.977	0	0
DAYNA	125	0.8	97.6	0.8	0.8	0	0
DE	30	3.333	23.333	13.333	60	0	0
DEAN	2174	0.644	94.986	0.782	3.404	0.046	0.138
DEANA	240	2.083	93.75	3.333	0.833	0	0
DEANE	43	0	97.674	2.326	0	0	0
DEANN	131	3.817	94.656	1.527	0	0	0
DEANNA	1380	2.246	91.957	3.623	1.667	0.29	0.217
DEANNE	258	0.388	96.899	0.388	1.938	0.388	0
DEBBI	41	2.439	97.561	0	0	0	0
DEBBIE	1366	4.173	87.408	4.539	3.294	0.366	0.22
DEBBY	73	1.37	94.521	0	4.11	0	0
DEBI	56	1.786	96.429	0	1.786	0	0
DEBORA	461	2.603	91.323	4.989	0.651	0	0.434
DEBORAH	10652	1.493	93.945	3.652	0.676	0.094	0.141
DEBRA	7369	1.601	94.26	3.65	0.38	0.095	0.014
DEBRAH	35	0	97.143	2.857	0	0	0
DECLAN	20	0	100	0	0	0	0
DEDRA	34	2.941	73.529	23.529	0	0	0
DEE	227	3.524	89.868	2.203	3.524	0.441	0.441
DEEANN	52	1.923	98.077	0	0	0	0
DEENA	182	0.549	91.758	4.396	3.297	0	0
DEEPA	57	0	10.526	0	85.965	1.754	1.754
DEEPAK	142	0.704	16.901	0	79.577	2.817	0
DEIDRA	75	1.333	68	30.667	0	0	0
DEIDRE	168	1.786	77.381	17.857	1.19	0.595	1.19
DEIRDRE	217	0.461	93.088	6.452	0	0	0
DEL	62	1.613	90.323	6.452	1.613	0	0
DELAINE	20	0	100	0	0	0	0
DELANA	30	0	93.333	6.667	0	0	0
DELBERT	194	1.546	92.268	5.155	1.031	0	0
DELFINA	41	78.049	14.634	0	7.317	0	0
DELFINO	35	88.571	8.571	0	2.857	0	0
DELIA	296	55.405	31.081	3.041	10.135	0	0.338
DELILAH	34	20.588	44.118	26.471	5.882	2.941	0
DELL	37	0	91.892	5.405	2.703	0	0
DELLA	146	4.11	78.767	15.068	1.37	0	0.685
DELMA	36	30.556	61.111	0	8.333	0	0
DELMAR	44	2.273	90.909	2.273	4.545	0	0
DELORES	474	2.743	68.776	27.004	0	0.844	0.633
DELORIS	87	0	56.322	43.678	0	0	0
DELPHINE	42	2.381	59.524	35.714	2.381	0	0
DELYNN	16	0	100	0	0	0	0
DEMETRIA	41	17.073	36.585	41.463	4.878	0	0
DEMETRIO	42	80.952	4.762	0	14.286	0	0
DEMETRIOS	49	0	100	0	0	0	0
DEMETRIUS	50	8	22	70	0	0	0
DENA	385	1.558	93.766	3.377	1.039	0.26	0
DENEEN	41	2.439	78.049	19.512	0	0	0
DENICE	124	7.258	87.903	3.226	0.806	0	0.806
DENIS	389	3.856	91.003	2.057	2.828	0.257	0
DENISE	5190	3.006	90.212	5.414	1.137	0.077	0.154
DENNIS	7681	1.51	93.49	1.927	2.838	0.117	0.117
DENNY	123	4.065	80.488	0	14.634	0	0.813
DENTON	34	0	94.118	2.941	2.941	0	0
DENVER	48	4.167	83.333	10.417	0	0	2.083
DEON	49	0	55.102	44.898	0	0	0
DEREK	1911	0.785	90.424	4.082	4.396	0.209	0.105
DERIC	33	3.03	78.788	9.091	9.091	0	0
DERICK	71	1.408	74.648	21.127	1.408	1.408	0
DERIK	41	2.439	95.122	2.439	0	0	0
DERON	33	0	90.909	9.091	0	0	0
DERRICK	598	3.01	55.351	35.117	5.686	0.502	0.334
DESIREE	329	11.55	71.429	12.462	3.343	0.304	0.912
DESMOND	95	7.368	49.474	35.789	6.316	0	1.053
DESPINA	36	2.778	97.222	0	0	0	0
DEVIN	323	1.238	89.164	5.882	3.406	0.31	0
DEVON	207	2.415	85.024	11.111	1.449	0	0
DEWAYNE	113	0	73.451	24.779	0.885	0	0.885
DEWEY	117	0.855	90.598	5.128	2.564	0.855	0
DEWITT	32	0	84.375	15.625	0	0	0
DEXTER	130	3.077	36.923	41.538	17.692	0	0.769
DIAN	86	1.163	81.395	4.651	11.628	0	1.163
DIANA	3626	11.142	83.591	1.903	2.923	0.248	0.193
DIANE	7305	1.643	94.47	2.464	1.246	0.096	0.082
DIANN	138	0.725	91.304	7.246	0.725	0	0
DIANNA	479	5.01	88.1	5.428	1.044	0.209	0.209
DIANNE	1243	1.287	92.116	5.068	1.287	0.08	0.161
DICK	75	2.667	73.333	0	24	0	0
DIEGO	198	83.333	15.152	0	1.01	0	0.505
DIEM	35	0	2.857	0	97.143	0	0
DIEP	47	0	2.128	0	95.745	0	2.128
DIETER	62	0	98.387	0	1.613	0	0
DIEU	20	0	0	0	100	0	0
DIGNA	30	73.333	10	0	16.667	0	0
DILIP	64	1.563	31.25	0	65.625	1.563	0
DILLON	47	0	91.489	4.255	4.255	0	0
DIMITRI	67	2.985	89.552	5.97	1.493	0	0
DIMITRIOS	59	1.695	96.61	1.695	0	0	0
DINA	493	9.939	84.584	2.231	2.84	0.406	0
DINAH	73	2.74	79.452	6.849	10.959	0	0
DINESH	93	1.075	19.355	0	77.419	1.075	1.075
DINH	46	2.174	0	0	97.826	0	0
DINO	133	3.008	89.474	1.504	6.015	0	0
DION	102	6.863	68.627	21.569	2.941	0	0
DIONISIO	37	45.946	8.108	0	45.946	0	0
DIONNE	78	3.846	53.846	39.744	2.564	0	0
DIPAK	45	2.222	15.556	0	82.222	0	0
DIRK	202	0.495	98.02	0.99	0.495	0	0
DIXIE	253	1.186	96.443	1.581	0.395	0.395	0
DMITRI	38	2.632	94.737	2.632	0	0	0
DMITRIY	85	0	98.824	0	1.176	0	0
DMITRY	90	1.111	98.889	0	0	0	0
DO	22	0	0	0	100	0	0
DOAN	30	0	3.333	0	96.667	0	0
DOLLY	77	2.597	62.338	6.494	25.974	1.299	1.299
DOLORES	1071	21.475	70.308	4.669	3.081	0.187	0.28
DOMENIC	108	0.926	97.222	0	1.852	0	0
DOMENICK	30	0	100	0	0	0	0
DOMENICO	59	5.085	94.915	0	0	0	0
DOMINGO	151	74.172	7.285	1.325	17.219	0	0
DOMINIC	574	4.878	89.199	1.568	4.355	0	0
DOMINICK	250	2	94.8	1.2	1.6	0	0.4
DOMINIQUE	137	7.299	72.993	16.058	2.92	0	0.73
DON	1253	0.798	87.63	3.831	7.422	0.239	0.08
DONA	171	0.585	94.737	1.17	2.339	0	1.17
DONAL	39	0	100	0	0	0	0
DONALD	12058	0.722	95.057	3.251	0.722	0.166	0.083
DONATO	40	12.5	70	0	17.5	0	0
DONG	188	0	2.66	0	97.34	0	0
DONITA	60	0	86.667	13.333	0	0	0
DONN	98	3.061	93.878	0	2.041	0	1.02
DONNA	8969	1.126	95.083	2.609	0.937	0.1	0.145
DONNELL	48	0	47.917	52.083	0	0	0
DONNIE	244	0.82	83.197	13.115	2.049	0.82	0
DONNY	52	0	78.846	7.692	13.462	0	0
DONOVAN	135	2.963	79.259	15.556	2.222	0	0
DORA	386	48.446	38.86	7.772	4.663	0.259	0
DORCAS	38	5.263	63.158	21.053	10.526	0	0
DOREEN	633	2.686	89.415	5.213	2.054	0.316	0.316
DORENE	86	5.814	88.372	3.488	1.163	0	1.163
DORI	74	1.351	93.243	1.351	2.703	0	1.351
DORIAN	78	7.692	71.795	19.231	0	0	1.282
DORINA	16	0	100	0	0	0	0
DORINDA	55	1.818	85.455	5.455	3.636	1.818	1.818
DORIS	1332	6.306	76.276	13.438	3.378	0.225	0.375
DORIT	18	0	100	0	0	0	0
DORON	27	0	100	0	0	0	0
DOROTA	62	1.613	95.161	0	3.226	0	0
DOROTHEA	120	0.833	80.833	15	2.5	0	0.833
DOROTHY	2573	1.71	82.86	13.175	1.671	0.35	0.233
DOUG	438	0.913	95.89	0.228	2.968	0	0
DOUGLAS	8505	0.788	96.767	1.211	1.011	0.082	0.141
DOUGLASS	53	0	96.226	1.887	1.887	0	0
DOV	24	0	100	0	0	0	0
DOYLE	146	0	95.89	2.74	1.37	0	0
DRAGAN	35	0	97.143	0	2.857	0	0
DRAKE	30	0	93.333	3.333	3.333	0	0
DREW	436	1.835	97.706	0.459	0	0	0
DRU	31	0	100	0	0	0	0
DUANE	1152	0.608	92.188	5.556	1.389	0.174	0.087
DUC	160	0.625	1.875	0	96.875	0	0.625
DUDLEY	58	1.724	82.759	12.069	3.448	0	0
DUKE	47	4.255	61.702	0	31.915	0	2.128
DULCE	79	77.215	13.924	1.266	7.595	0	0
DUNCAN	145	0.69	93.103	6.207	0	0	0
DUNG	213	0.469	2.347	0	96.714	0	0.469
DUONG	38	0	5.263	0	94.737	0	0
DUSTIN	1179	0.848	97.116	0.254	1.187	0.424	0.17
DUSTY	76	1.316	97.368	0	1.316	0	0
DUY	41	0	2.439	0	97.561	0	0
DWAIN	49	0	83.673	16.327	0	0	0
DWAINE	36	2.778	86.111	11.111	0	0	0
DWAYNE	488	0.82	74.795	23.156	0.82	0.41	0
DWIGHT	624	1.122	79.006	16.667	3.045	0	0.16
DYAN	39	2.564	89.744	5.128	2.564	0	0
DYLAN	202	0.99	94.059	1.485	3.465	0	0
DZUNG	25	0	0	0	100	0	0
EARL	977	0.716	83.828	13.408	1.842	0.102	0.102
EARLE	64	0	90.625	6.25	3.125	0	0
EARLENE	47	0	74.468	23.404	2.128	0	0
EARLINE	33	0	48.485	48.485	3.03	0	0
EARNEST	89	0	56.18	40.449	2.247	0	1.124
EARNESTINE	31	0	16.129	83.871	0	0	0
EBONY	58	3.448	5.172	87.931	1.724	1.724	0
ED	134	4.478	84.328	0.746	8.955	0.746	0.746
EDDIE	694	12.536	50.144	24.64	12.248	0.144	0.288
EDDY	108	34.259	45.37	12.963	7.407	0	0
EDEN	67	7.463	53.731	13.433	20.896	1.493	2.985
EDGAR	851	50.059	38.778	3.878	6.58	0.47	0.235
EDGARDO	124	50.806	10.484	0	38.71	0	0
EDIE	34	2.941	94.118	0	0	0	2.941
EDILBERTO	37	40.541	10.811	0	48.649	0	0
EDISON	52	32.692	36.538	15.385	13.462	1.923	0
EDITH	624	16.667	69.551	9.455	4.006	0.16	0.16
EDMOND	205	2.927	73.659	7.805	15.61	0	0
EDMUND	454	4.846	83.7	4.185	7.048	0	0.22
EDMUNDO	63	65.079	15.873	0	19.048	0	0
EDNA	460	11.957	61.087	12.609	13.478	0.435	0.435
EDUARD	70	4.286	91.429	0	2.857	1.429	0
EDUARDO	911	78.814	10.428	0.329	10.318	0	0.11
EDWARD	10112	4.144	89.221	3.422	2.937	0.148	0.129
EDWIN	1479	19.675	67.41	4.665	7.978	0.068	0.203
EDWINA	88	3.409	59.091	26.136	11.364	0	0
EDYTA	19	0	100	0	0	0	0
EFFIE	46	2.174	69.565	17.391	10.87	0	0
EFRAIN	213	93.427	5.634	0	0.939	0	0
EFREN	149	75.168	6.04	0	18.792	0	0
EILEEN	2031	2.068	94.485	0.935	2.314	0.098	0.098
EKATERINA	35	0	100	0	0	0	0
ELAINA	49	2.041	91.837	4.082	2.041	0	0
ELAINE	2364	2.073	87.775	4.484	5.499	0.085	0.085
ELANA	61	3.279	88.525	6.557	1.639	0	0
ELBA	64	87.5	10.938	0	1.563	0	0
ELBERT	97	3.093	52.577	37.113	7.216	0	0
ELDA	54	64.815	29.63	5.556	0	0	0
ELDEN	30	0	86.667	6.667	6.667	0	0
ELDON	116	0	99.138	0	0.862	0	0
ELEANOR	707	3.536	82.603	7.355	6.223	0	0.283
ELEANORE	30	10	80	0	6.667	0	3.333
ELEAZAR	51	90.196	5.882	1.961	1.961	0	0
ELEFTHERIOS	20	0	100	0	0	0	0
ELENA	712	27.107	65.028	0.983	6.461	0.14	0.281
ELENI	59	0	94.915	5.085	0	0	0
ELEONORA	34	8.824	88.235	0	2.941	0	0
ELI	201	10.945	81.095	5.97	1.99	0	0
ELIA	89	74.157	24.719	1.124	0	0	0
ELIANA	31	54.839	41.935	3.226	0	0	0
ELIAS	311	48.232	43.73	4.502	3.215	0.322	0
ELIDA	56	87.5	12.5	0	0	0	0
ELIE	48	6.25	89.583	2.083	2.083	0	0
ELIJAH	98	3.061	55.102	36.735	4.082	0	1.02
ELIN	18	0	100	0	0	0	0
ELINOR	56	0	92.857	3.571	3.571	0	0
ELIO	32	40.625	59.375	0	0	0	0
ELIOT	46	13.043	82.609	0	4.348	0	0
ELISA	404	25.495	65.842	1.98	6.436	0.248	0
ELISABETH	448	2.679	96.205	0.223	0.67	0.223	0
ELISE	320	0.938	93.75	3.438	1.25	0.313	0.313
ELISEO	103	87.379	1.942	0	10.68	0	0
ELISHA	87	6.897	83.908	9.195	0	0	0
ELISSA	136	3.676	95.588	0	0	0.735	0
ELIZA	94	11.702	60.638	17.021	9.574	1.064	0
ELIZABETH	12737	5.967	90.547	1.523	1.759	0.102	0.102
ELKE	49	0	100	0	0	0	0
ELLA	237	1.688	67.511	25.738	3.797	1.266	0
ELLEN	2744	0.729	94.971	1.239	2.915	0.109	0.036
ELLIE	56	8.929	76.786	1.786	12.5	0	0
ELLIOT	191	5.236	85.34	6.283	3.141	0	0
ELLIOTT	201	0.995	82.587	12.438	3.483	0.498	0
ELLIS	120	2.5	73.333	23.333	0.833	0	0
ELLYN	49	0	93.878	0	6.122	0	0
ELMA	62	33.871	33.871	12.903	19.355	0	0
ELMER	320	20.937	63.75	7.5	6.875	0.625	0.313
ELOISA	55	63.636	21.818	1.818	12.727	0	0
ELOISE	86	13.953	63.953	18.605	2.326	0	1.163
ELOY	84	88.095	7.143	1.19	2.381	1.19	0
ELPIDIO	35	48.571	22.857	0	28.571	0	0
ELSA	291	56.014	32.99	4.124	6.529	0.344	0
ELSIE	221	10.86	66.968	14.027	6.787	0.905	0.452
ELTON	77	0	71.429	24.675	2.597	1.299	0
ELVA	133	71.429	27.068	0.752	0.752	0	0
ELVIA	138	89.13	7.246	2.899	0.725	0	0
ELVIN	83	30.12	49.398	13.253	7.229	0	0
ELVIRA	239	50.209	30.962	3.766	14.644	0	0.418
ELVIS	84	44.048	21.429	23.81	9.524	0	1.19
ELWIN	16	0	100	0	0	0	0
ELWOOD	69	1.449	84.058	14.493	0	0	0
ELYSE	107	1.869	93.458	1.869	1.869	0	0.935
ELYSSA	19	0	100	0	0	0	0
ELZBIETA	62	3.226	95.161	1.613	0	0	0
EMAD	54	1.852	77.778	1.852	16.667	1.852	0
EMANUEL	128	18.75	57.813	21.094	2.344	0	0
EMERSON	52	9.615	67.308	1.923	17.308	3.846	0
EMERY	58	3.448	84.483	8.621	1.724	1.724	0
EMIL	183	2.732	93.443	1.093	2.186	0.546	0
EMILE	69	7.246	73.913	18.841	0	0	0
EMILEE	33	0	96.97	0	3.03	0	0
EMILIA	128	46.875	46.094	0.781	6.25	0	0
EMILIANO	48	72.917	12.5	0	14.583	0	0
EMILIE	98	1.02	92.857	1.02	5.102	0	0
EMILIO	195	74.359	21.026	1.026	3.077	0	0.513
EMILY	2809	1.673	92.026	1.709	4.201	0.142	0.249
EMMA	532	24.436	54.511	14.098	6.203	0.752	0
EMMANUEL	295	24.746	28.475	27.458	19.322	0	0
EMMETT	94	1.064	78.723	18.085	1.064	1.064	0
EMORY	50	2	88	10	0	0	0
ENEDINA	27	100	0	0	0	0	0
ENID	49	12.245	73.469	14.286	0	0	0
ENRICO	59	15.254	69.492	3.39	11.864	0	0
ENRIQUE	658	89.362	6.383	0	4.255	0	0
ENRIQUETA	35	77.143	14.286	0	8.571	0	0
EPIFANIO	33	84.848	3.03	0	12.121	0	0
ERAN	20	0	100	0	0	0	0
ERASMO	41	90.244	9.756	0	0	0	0
ERIC	10840	2.97	89.53	3.727	3.496	0.129	0.148
ERICA	1414	9.335	80.057	8.699	1.627	0.212	0.071
ERICH	194	1.546	97.423	0.515	0.515	0	0
ERICK	320	30	61.875	4.063	3.75	0.313	0
ERICKA	134	20.896	52.985	26.119	0	0	0
ERIK	1674	5.018	92.533	1.314	1.016	0.119	0
ERIKA	948	18.46	73.523	6.224	1.266	0.105	0.422
ERIN	3413	0.938	97.949	0.469	0.439	0.117	0.088
ERINN	37	0	91.892	5.405	2.703	0	0
ERLINDA	130	10	13.077	0	76.154	0	0.769
ERMA	82	3.659	62.195	30.488	3.659	0	0
ERNEST	1390	9.281	75.252	11.871	3.094	0.288	0.216
ERNESTINA	51	82.353	9.804	5.882	1.961	0	0
ERNESTINE	112	11.607	44.643	41.071	1.786	0.893	0
ERNESTO	574	77.7	7.666	0.871	13.763	0	0
ERNIE	133	24.06	59.398	3.008	12.03	0.752	0.752
ERNST	36	0	66.667	33.333	0	0	0
ERROL	93	1.075	43.011	49.462	5.376	1.075	0
ERVIN	97	7.216	70.103	22.68	0	0	0
ERWIN	157	13.376	55.414	5.096	25.478	0	0.637
ERYN	32	0	96.875	3.125	0	0	0
ESMERALDA	134	82.836	9.701	1.493	5.97	0	0
ESPERANZA	209	84.211	8.134	0.478	7.177	0	0
ESSIE	34	2.941	14.706	79.412	2.941	0	0
ESTEBAN	178	89.326	7.865	0	2.809	0	0
ESTELA	157	82.166	10.828	0.637	5.732	0	0.637
ESTELLA	95	52.632	28.421	12.632	5.263	0	1.053
ESTELLE	82	4.878	85.366	9.756	0	0	0
ESTER	60	33.333	41.667	8.333	16.667	0	0
ESTHER	878	25.513	52.961	10.364	10.364	0.569	0.228
ESTRELLA	52	32.692	13.462	0	53.846	0	0
ETHAN	257	1.556	94.163	0.389	3.502	0	0.389
ETHEL	278	4.317	60.791	28.777	5.036	0.719	0.36
ETTA	45	2.222	64.444	28.889	2.222	0	2.222
EUGENE	2189	2.741	84.651	6.67	5.71	0.046	0.183
EUGENIA	226	18.584	70.796	6.195	4.425	0	0
EUGENIO	102	74.51	17.647	0	7.843	0	0
EULA	46	0	50	50	0	0	0
EULALIA	34	67.647	29.412	0	2.941	0	0
EUN	134	0.746	2.239	0	96.269	0	0.746
EUNICE	222	11.261	43.694	22.523	21.622	0.901	0
EUSEBIO	59	83.051	6.78	3.39	6.78	0	0
EVA	898	20.824	67.595	5.234	5.902	0.223	0.223
EVAN	651	1.69	94.931	1.229	1.997	0	0.154
EVANGELINA	100	83	14	0	3	0	0
EVANGELINE	139	12.95	41.727	7.914	35.971	0.719	0.719
EVANGELOS	27	0	100	0	0	0	0
EVANS	30	3.333	56.667	40	0	0	0
EVE	164	3.659	92.073	0.61	3.659	0	0
EVELIA	46	97.826	2.174	0	0	0	0
EVELINA	34	32.353	61.765	0	5.882	0	0
EVELYN	1379	13.706	66.497	11.313	7.832	0.218	0.435
EVERARDO	58	96.552	3.448	0	0	0	0
EVERETT	296	0.676	86.824	9.797	2.365	0	0.338
EVETTE	32	18.75	43.75	37.5	0	0	0
EVONNE	49	0	79.592	18.367	2.041	0	0
EWA	100	1	98	0	1	0	0
EYAL	21	0	100	0	0	0	0
EZEQUIEL	72	95.833	4.167	0	0	0	0
EZRA	54	0	77.778	16.667	5.556	0	0
FABIAN	113	66.372	23.009	7.08	3.54	0	0
FABIO	56	32.143	66.071	1.786	0	0	0
FABIOLA	85	81.176	16.471	2.353	0	0	0
FADI	45	0	88.889	0	11.111	0	0
FAE	15	0	100	0	0	0	0
FAISAL	47	2.128	44.681	0	51.064	2.128	0
FAITH	384	1.823	88.021	5.99	3.385	0.521	0.26
FAN	54	0	3.704	0	96.296	0	0
FANG	56	0	0	0	100	0	0
FANNIE	60	1.667	25	66.667	6.667	0	0
FANNY	70	41.429	21.429	0	37.143	0	0
FARAH	57	3.509	57.895	10.526	28.07	0	0
FARHAD	64	0	76.563	0	23.438	0	0
FARIBORZ	17	0	100	0	0	0	0
FARID	56	1.786	73.214	1.786	21.429	1.786	0
FARIDA	33	3.03	39.394	3.03	51.515	3.03	0
FARRAH	45	2.222	68.889	15.556	13.333	0	0
FATIMA	142	21.127	48.592	7.042	21.127	1.408	0.704
FAUSTINO	65	84.615	10.769	1.538	3.077	0	0
FAUSTO	62	83.871	16.129	0	0	0	0
FAWN	31	3.226	96.774	0	0	0	0
FAY	146	0	80.822	7.534	10.959	0	0.685
FAYE	329	0.912	81.459	10.638	6.687	0.304	0
FE	56	23.214	12.5	0	64.286	0	0
FEDERICO	156	75	15.385	0.641	8.333	0	0.641
FEI	46	0	2.174	0	97.826	0	0
FELECIA	47	2.128	31.915	65.957	0	0	0
FELICE	58	3.448	87.931	8.621	0	0	0
FELICIA	448	7.589	56.027	33.259	2.455	0.446	0.223
FELICIANO	48	62.5	20.833	0	16.667	0	0
FELICITAS	42	66.667	11.905	2.381	19.048	0	0
FELIPE	413	90.557	3.632	0.726	4.6	0.484	0
FELIX	504	55.952	27.579	6.944	9.127	0.397	0
FEN	18	0	0	0	100	0	0
FENG	134	1.493	0.746	0	97.761	0	0
FERDINAND	101	17.822	38.614	3.96	39.604	0	0
FERMIN	67	88.06	4.478	0	7.463	0	0
FERN	72	0	90.278	6.944	1.389	1.389	0
FERNANDA	47	25.532	70.213	4.255	0	0	0
FERNANDO	983	78.637	14.852	0.61	5.799	0.102	0
FIDEL	177	90.395	4.52	1.13	3.39	0.565	0
FIDENCIO	30	90	6.667	0	3.333	0	0
FILIBERTO	52	92.308	7.692	0	0	0	0
FILOMENA	56	17.857	58.929	0	23.214	0	0
FIONA	107	0.935	86.916	2.804	9.346	0	0
FLAVIA	33	33.333	54.545	6.061	6.061	0	0
FLAVIO	51	86.275	13.725	0	0	0	0
FLETCHER	30	0	80	20	0	0	0
FLOR	88	82.955	12.5	0	4.545	0	0
FLORA	181	24.309	46.961	11.05	17.68	0	0
FLORENCE	505	1.98	75.248	13.861	8.515	0.396	0
FLORENCIO	53	71.698	9.434	0	18.868	0	0
FLORENTINO	62	80.645	4.839	0	14.516	0	0
FLORIAN	41	4.878	92.683	0	2.439	0	0
FLORIN	31	3.226	96.774	0	0	0	0
FLOYD	501	0.998	82.834	12.974	2.595	0.2	0.399
FONDA	35	0	88.571	11.429	0	0	0
FORD	16	0	100	0	0	0	0
FOREST	58	0	91.379	5.172	3.448	0	0
FORREST	256	0.391	95.313	3.125	1.172	0	0
FRAN	90	0	96.667	1.111	1.111	0	1.111
FRANCES	2026	6.96	83.81	5.726	2.962	0.247	0.296
FRANCESCA	142	4.225	92.254	2.817	0.704	0	0
FRANCESCO	121	2.479	97.521	0	0	0	0
FRANCINE	409	2.934	86.308	8.802	1.222	0.244	0.489
FRANCIS	2114	2.271	88.269	3.075	6.197	0.095	0.095
FRANCISCA	198	82.828	7.576	4.04	5.556	0	0
FRANCISCO	1884	87.898	8.652	0.159	3.291	0	0
FRANCO	89	17.978	75.281	3.371	3.371	0	0
FRANCOIS	61	1.639	78.689	14.754	4.918	0	0
FRANK	6611	7.003	86.855	2.904	2.859	0.287	0.091
FRANKIE	179	10.615	67.598	15.642	5.587	0.559	0
FRANKLIN	723	8.99	74.827	9.129	6.639	0.138	0.277
FRANKLYN	35	17.143	68.571	11.429	2.857	0	0
FRANZ	38	13.158	81.579	0	5.263	0	0
FRED	1773	3.892	87.874	4.738	3.046	0.169	0.282
FREDA	102	1.961	81.373	14.706	1.961	0	0
FREDDIE	214	12.617	44.393	36.449	5.607	0	0.935
FREDDY	123	62.602	26.829	6.504	4.065	0	0
FREDERIC	201	2.488	91.542	2.985	2.985	0	0
FREDERICK	2397	0.918	89.487	6.675	2.67	0.083	0.167
FREDRIC	104	0	98.077	1.923	0	0	0
FREDRICK	281	1.068	82.918	14.235	0.712	1.068	0
FREDY	59	84.746	8.475	0	6.78	0	0
FRIEDA	49	2.041	81.633	6.122	10.204	0	0
FRIEDRICH	18	0	100	0	0	0	0
FRITZ	51	1.961	76.471	17.647	3.922	0	0
FU	33	3.03	0	0	96.97	0	0
GABINO	37	97.297	2.703	0	0	0	0
GABRIEL	1051	49.286	45.956	2.188	2.284	0	0.285
GABRIELA	294	62.585	36.395	0.34	0	0.34	0.34
GABRIELE	65	4.615	95.385	0	0	0	0
GABRIELLA	71	12.676	85.915	0	0	0	1.408
GABRIELLE	199	2.513	89.95	5.528	0.503	0.503	1.005
GAETANO	63	0	98.413	0	1.587	0	0
GAIL	2620	0.573	93.473	4.16	1.641	0	0.153
GALE	325	1.231	89.538	6.462	2.462	0.308	0
GALEN	145	1.379	93.793	1.379	3.448	0	0
GALINA	131	0	98.473	0	1.527	0	0
GANESH	65	1.538	20	0	78.462	0	0
GANG	76	0	1.316	0	98.684	0	0
GAREN	18	0	100	0	0	0	0
GARETH	49	2.041	87.755	2.041	6.122	0	2.041
GARLAND	97	1.031	83.505	15.464	0	0	0
GARNET	35	2.857	80	17.143	0	0	0
GARRET	72	0	88.889	1.389	9.722	0	0
GARRETT	476	1.261	92.437	2.311	3.782	0.21	0
GARRICK	39	0	79.487	7.692	10.256	2.564	0
GARRISON	20	0	100	0	0	0	0
GARRY	425	0.941	92.471	4	2.588	0	0
GARTH	152	0	90.789	7.237	1.316	0	0.658
GARY	12141	0.799	95.396	1.68	1.903	0.091	0.132
GASPAR	31	77.419	16.129	0	6.452	0	0
GAURAV	49	0	18.367	0	79.592	2.041	0
GAUTAM	38	5.263	15.789	0	76.316	2.632	0
GAVIN	204	1.961	90.686	1.961	4.902	0.49	0
GAY	166	0	94.578	2.41	2.41	0	0.602
GAYE	74	2.703	94.595	2.703	0	0	0
GAYLA	118	1.695	94.068	3.39	0	0.847	0
GAYLE	916	1.092	94.76	2.62	1.31	0	0.218
GAYLEN	21	0	100	0	0	0	0
GAYLENE	41	0	100	0	0	0	0
GAYLORD	39	0	94.872	2.564	0	0	2.564
GE	19	0	0	0	100	0	0
GEETA	65	0	29.231	1.538	67.692	0	1.538
GEETHA	37	0	16.216	2.703	81.081	0	0
GEMMA	57	8.772	54.386	1.754	35.088	0	0
GENA	127	3.15	90.551	3.937	2.362	0	0
GENARO	86	90.698	3.488	0	5.814	0	0
GENE	868	1.267	89.862	4.378	4.147	0.115	0.23
GENEVA	140	2.857	67.143	27.143	1.429	0.714	0.714
GENEVIEVE	301	8.306	81.728	3.654	5.316	0.997	0
GENNADY	31	0	100	0	0	0	0
GENNARO	44	2.273	97.727	0	0	0	0
GENOVEVA	51	72.549	15.686	0	11.765	0	0
GEOFF	90	1.111	97.778	0	1.111	0	0
GEOFFREY	1066	0.938	95.779	0.844	2.345	0	0.094
GEORG	19	0	100	0	0	0	0
GEORGE	9261	4.708	86.945	4.891	3.088	0.194	0.173
GEORGENE	37	2.703	94.595	2.703	0	0	0
GEORGETTE	95	2.105	82.105	13.684	2.105	0	0
GEORGI	18	0	100	0	0	0	0
GEORGIA	563	3.197	86.323	9.236	0.888	0.355	0
GEORGIANA	41	4.878	87.805	4.878	2.439	0	0
GEORGIANNA	37	5.405	89.189	0	0	2.703	2.703
GEORGINA	178	41.573	48.876	6.742	2.247	0.562	0
GERALD	4331	1.247	93.373	3.671	1.408	0.162	0.139
GERALDINE	973	5.653	78.109	12.847	3.186	0.103	0.103
GERALYN	82	1.22	93.902	1.22	0	0	3.659
GERARD	852	2.347	91.315	3.756	2.23	0	0.352
GERARDO	603	86.235	8.458	0	5.307	0	0
GERD	19	0	100	0	0	0	0
GERHARD	72	1.389	98.611	0	0	0	0
GERI	137	0.73	97.08	2.19	0	0	0
GERMAINE	52	7.692	75	15.385	1.923	0	0
GERMAN	154	81.818	15.584	0.649	1.948	0	0
GERONIMO	45	75.556	6.667	0	15.556	2.222	0
GERRI	66	1.515	95.455	3.03	0	0	0
GERRIE	15	0	100	0	0	0	0
GERRY	191	4.712	85.864	5.236	4.188	0	0
GERTRUDE	168	2.381	72.619	22.619	1.786	0	0.595
GHASSAN	48	0	89.583	0	10.417	0	0
GHEORGHE	36	0	100	0	0	0	0
GIA	43	4.651	69.767	11.628	13.953	0	0
GIANCARLO	31	22.581	77.419	0	0	0	0
GIANG	41	0	0	0	100	0	0
GIAO	17	0	0	0	100	0	0
GIDEON	42	2.381	83.333	4.762	9.524	0	0
GIGI	55	7.273	74.545	3.636	14.545	0	0
GIL	113	23.894	53.982	0	22.124	0	0
GILBERT	777	32.947	56.757	4.633	5.148	0.386	0.129
GILBERTO	295	91.864	7.458	0.339	0.339	0	0
GILDA	101	31.683	52.475	10.891	4.95	0	0
GILDARDO	34	91.176	8.824	0	0	0	0
GILES	41	2.439	95.122	0	2.439	0	0
GILLES	26	0	100	0	0	0	0
GILLIAN	151	1.325	88.742	7.947	1.987	0	0
GINA	2124	3.814	90.301	2.542	3.202	0.094	0.047
GINETTE	31	0	64.516	32.258	3.226	0	0
GINGER	478	0.628	94.77	2.092	1.674	0.628	0.209
GINNY	52	1.923	96.154	0	0	0	1.923
GINO	108	8.333	87.037	0	4.63	0	0
GIOVANNA	61	14.754	80.328	1.639	1.639	1.639	0
GIOVANNI	183	22.404	69.399	2.732	4.918	0.546	0
GIRISH	50	0	8	0	90	2	0
GISELA	80	35	63.75	0	1.25	0	0
GISELE	46	8.696	71.739	17.391	2.174	0	0
GISELLE	53	32.075	56.604	9.434	1.887	0	0
GITA	40	0	37.5	0	62.5	0	0
GIULIO	21	0	100	0	0	0	0
GIUSEPPE	170	4.118	94.118	0.588	0.588	0.588	0
GIUSEPPINA	25	0	100	0	0	0	0
GLADYS	446	34.081	41.704	18.834	5.381	0	0
GLEN	1283	0.701	94.154	1.325	3.741	0	0.078
GLENDA	799	6.008	81.477	9.512	2.503	0.375	0.125
GLENN	2798	0.715	91.994	3.074	3.753	0.179	0.286
GLENNA	126	0.794	93.651	3.175	1.587	0	0.794
GLENNON	19	0	100	0	0	0	0
GLORIA	2752	26.926	55.342	12.5	4.76	0.218	0.254
GLORY	30	0	83.333	13.333	3.333	0	0
GLYNN	38	0	86.842	10.526	2.632	0	0
GONZALO	208	92.788	6.25	0	0.962	0	0
GOPAL	48	0	12.5	0	87.5	0	0
GORAN	41	0	100	0	0	0	0
GORDANA	26	0	100	0	0	0	0
GORDON	1379	0.435	92.966	1.668	4.423	0.363	0.145
GRACE	1136	6.602	64.965	6.338	21.919	0.176	0
GRACIE	48	18.75	41.667	35.417	2.083	2.083	0
GRACIELA	256	85.547	14.063	0.391	0	0	0
GRADY	125	2.4	87.2	10.4	0	0	0
GRAEME	55	0	100	0	0	0	0
GRAHAM	272	0	97.426	1.838	0.368	0.368	0
GRAIG	22	0	100	0	0	0	0
GRANT	744	0.269	96.102	0.806	2.823	0	0
GRAYDON	19	0	100	0	0	0	0
GRAYSON	26	0	100	0	0	0	0
GRAZYNA	46	2.174	95.652	2.174	0	0	0
GREG	1551	1.354	94.907	1.483	2.063	0.064	0.129
GREGG	819	0.366	97.558	0.855	1.221	0	0
GREGGORY	40	0	87.5	10	2.5	0	0
GREGORIA	33	69.697	15.152	3.03	12.121	0	0
GREGORIO	159	76.73	8.805	0.629	13.836	0	0
GREGORY	10488	1.068	93.965	3.871	0.896	0.086	0.114
GRETA	184	1.087	82.609	11.957	3.804	0	0.543
GRETCHEN	793	0.757	96.974	1.513	0.378	0.126	0.252
GRICELDA	37	91.892	8.108	0	0	0	0
GRIGOR	28	0	100	0	0	0	0
GRIGORIY	19	0	100	0	0	0	0
GRISELDA	114	86.842	7.895	1.754	3.509	0	0
GROVER	61	3.279	80.328	16.393	0	0	0
GRZEGORZ	69	0	100	0	0	0	0
GUADALUPE	674	94.807	4.748	0	0.445	0	0
GUAN	17	0	0	0	100	0	0
GUANG	41	0	4.878	0	95.122	0	0
GUDRUN	17	0	100	0	0	0	0
GUIDO	61	18.033	81.967	0	0	0	0
GUILLERMINA	116	93.103	6.897	0	0	0	0
GUILLERMO	542	90.959	6.273	0	2.583	0	0.185
GUNNAR	27	0	100	0	0	0	0
GUNTHER	19	0	100	0	0	0	0
GUO	73	1.37	0	0	98.63	0	0
GURPREET	50	0	26	0	68	6	0
GUS	110	13.636	80.909	3.636	1.818	0	0
GUSTAV	15	0	100	0	0	0	0
GUSTAVO	482	90.249	9.129	0.207	0.415	0	0
GUY	884	1.018	93.439	2.828	2.262	0	0.452
GWEN	376	1.064	92.287	3.191	2.926	0.266	0.266
GWENDOLYN	622	1.125	54.18	43.087	1.125	0	0.482
GWYN	31	0	96.774	0	3.226	0	0
GWYNETH	15	0	100	0	0	0	0
HA	99	0	6.061	0	91.919	0	2.02
HABIB	40	0	70	7.5	20	0	2.5
HAE	50	0	2	0	98	0	0
HAI	215	0.465	1.395	0	98.14	0	0
HAILEY	41	0	87.805	0	12.195	0	0
HAIM	19	0	100	0	0	0	0
HAKOP	17	0	100	0	0	0	0
HAL	165	0.606	95.758	1.212	2.424	0	0
HALEY	138	0.725	96.377	1.449	1.449	0	0
HALINA	60	0	100	0	0	0	0
HALLIE	68	0	97.059	2.941	0	0	0
HAMID	131	0	74.809	1.527	23.664	0	0
HAMILTON	31	9.677	64.516	9.677	16.129	0	0
HAN	90	0	6.667	0	93.333	0	0
HANA	34	2.941	73.529	2.941	20.588	0	0
HANAN	33	0	90.909	0	9.091	0	0
HANG	85	1.176	3.529	0	95.294	0	0
HANH	83	0	0	0	100	0	0
HANI	33	0	81.818	0	18.182	0	0
HANK	42	0	78.571	0	21.429	0	0
HANNA	100	2	67	8	23	0	0
HANNAH	394	1.269	81.726	3.553	12.944	0.254	0.254
HANNELORE	28	0	100	0	0	0	0
HANS	307	2.28	92.834	0.651	3.583	0.326	0.326
HANY	43	0	88.372	0	11.628	0	0
HAO	148	0.676	0	0	99.324	0	0
HARALD	35	8.571	88.571	0	2.857	0	0
HARI	49	0	26.531	0	69.388	2.041	2.041
HARINDER	36	5.556	19.444	2.778	69.444	2.778	0
HARISH	50	0	16	0	82	0	2
HARJINDER	50	0	20	0	80	0	0
HARLAN	125	0.8	94.4	2.4	0.8	1.6	0
HARLEY	123	1.626	93.496	3.252	1.626	0	0
HARMONY	31	0	87.097	0	6.452	3.226	3.226
HAROLD	2340	2.222	88.846	6.966	1.538	0.299	0.128
HARPREET	63	0	23.81	0	74.603	1.587	0
HARRIET	289	0.692	83.737	11.419	3.806	0	0.346
HARRIETT	69	1.449	82.609	15.942	0	0	0
HARRIS	94	3.191	79.787	2.128	12.766	1.064	1.064
HARRISON	86	2.326	67.442	19.767	9.302	1.163	0
HARRY	1839	1.849	88.309	4.84	4.568	0.272	0.163
HARVEY	605	2.149	85.455	8.926	3.14	0	0.331
HASAN	45	2.222	71.111	2.222	22.222	2.222	0
HASMIK	21	0	100	0	0	0	0
HASSAN	111	3.604	66.667	9.91	18.018	0	1.802
HATTIE	65	1.538	35.385	60	1.538	1.538	0
HAU	34	2.941	0	0	94.118	0	2.941
HAYDEE	49	81.633	12.245	0	6.122	0	0
HAYDEN	30	3.333	83.333	10	3.333	0	0
HAYLEY	84	0	96.429	1.19	1.19	1.19	0
HAZEL	283	1.767	67.491	20.848	7.774	0.353	1.767
HEATH	240	0	97.5	1.25	0.417	0.417	0.417
HEATHER	5801	0.896	97.397	0.896	0.517	0.138	0.155
HECTOR	1110	92.703	5.495	0.45	1.351	0	0
HEDY	31	6.452	77.419	3.226	12.903	0	0
HEE	54	1.852	3.704	0	92.593	0	1.852
HEIDE	44	2.273	95.455	0	0	0	2.273
HEIDI	2183	0.87	97.16	0.366	1.466	0.137	0
HEIKE	35	0	97.143	2.857	0	0	0
HEINZ	47	4.255	91.489	2.128	2.128	0	0
HELEN	2750	3.309	79.345	6.8	10.036	0.145	0.364
HELENA	221	6.335	75.113	5.882	11.765	0.905	0
HELENE	279	1.075	94.265	2.151	2.509	0	0
HELGA	85	3.529	96.471	0	0	0	0
HELMUT	32	0	100	0	0	0	0
HEMA	32	0	15.625	0	81.25	3.125	0
HEMANT	41	0	24.39	2.439	68.293	2.439	2.439
HENDRIK	20	0	100	0	0	0	0
HENG	40	2.5	2.5	0	95	0	0
HENRI	45	4.444	71.111	13.333	11.111	0	0
HENRIETTA	97	12.371	58.763	26.804	2.062	0	0
HENRIK	37	0	94.595	2.703	2.703	0	0
HENRY	2758	10.116	66.425	9.101	14.068	0.073	0.218
HENRYK	28	0	100	0	0	0	0
HERB	34	0	91.176	8.824	0	0	0
HERBERT	929	3.229	82.131	11.302	2.691	0.538	0.108
HERIBERTO	142	91.549	7.746	0	0.704	0	0
HERLINDA	49	85.714	12.245	2.041	0	0	0
HERMAN	410	10	56.098	23.171	10.732	0	0
HERMELINDA	40	80	10	2.5	7.5	0	0
HERMINIA	55	63.636	9.091	0	25.455	0	1.818
HERMINIO	35	54.286	14.286	0	31.429	0	0
HERNAN	70	85.714	14.286	0	0	0	0
HERVE	30	3.333	83.333	10	3.333	0	0
HETAL	34	0	11.765	0	88.235	0	0
HIEN	115	0	1.739	0	98.261	0	0
HIEP	62	1.613	1.613	0	96.774	0	0
HIEU	77	1.299	2.597	0	96.104	0	0
HILARIO	64	85.938	1.563	0	12.5	0	0
HILARY	280	0	98.214	0.357	0.714	0.357	0.357
HILDA	380	53.158	40	3.947	2.368	0	0.526
HILLARY	198	1.01	96.97	0.505	1.01	0.505	0
HIMANSHU	30	0	13.333	0	86.667	0	0
HINA	38	0	15.789	0	81.579	2.632	0
HING	18	0	0	0	100	0	0
HIPOLITO	48	89.583	4.167	0	6.25	0	0
HIRAM	62	41.935	46.774	4.839	6.452	0	0
HIROKO	30	0	13.333	0	86.667	0	0
HISHAM	30	3.333	83.333	0	13.333	0	0
HITESH	33	0	18.182	0	81.818	0	0
HO	78	0	0	0	98.718	0	1.282
HOA	171	0.585	0.585	0	98.83	0	0
HOAI	19	0	0	0	100	0	0
HOAN	31	0	9.677	0	90.323	0	0
HOANG	153	0.654	1.307	0	98.039	0	0
HOI	29	0	0	0	100	0	0
HOLLEY	33	0	100	0	0	0	0
HOLLI	76	0	98.684	1.316	0	0	0
HOLLIE	127	0	96.063	3.937	0	0	0
HOLLIS	75	2.667	84	12	1.333	0	0
HOLLY	2368	0.591	97.382	0.507	1.394	0.042	0.084
HOMER	126	7.143	79.365	7.937	5.556	0	0
HOMERO	31	93.548	3.226	3.226	0	0	0
HONG	398	0.503	1.508	0	97.739	0	0.251
HOPE	296	5.743	83.446	9.797	1.014	0	0
HORACE	155	1.29	54.194	41.935	1.935	0	0.645
HORACIO	87	87.356	10.345	1.149	1.149	0	0
HORST	23	0	100	0	0	0	0
HORTENCIA	66	93.939	6.061	0	0	0	0
HOSSEIN	52	0	90.385	0	7.692	1.923	0
HOUSTON	35	2.857	77.143	20	0	0	0
HOWARD	2259	0.575	89.154	5.755	4.338	0.089	0.089
HOYT	37	2.703	91.892	2.703	2.703	0	0
HSIU	19	0	0	0	100	0	0
HUA	101	0	0	0	100	0	0
HUAN	75	0	1.333	1.333	97.333	0	0
HUBERT	191	1.571	74.869	14.66	8.377	0.524	0
HUE	54	0	3.704	0	96.296	0	0
HUEY	37	0	29.73	18.919	51.351	0	0
HUGH	596	0.168	92.953	4.698	1.846	0	0.336
HUGO	376	81.383	17.021	0	1.596	0	0
HUI	181	0.552	0.552	0	98.895	0	0
HUMBERTO	313	92.971	5.431	0.958	0.639	0	0
HUN	15	0	0	0	100	0	0
HUNG	419	0.477	0.716	0.239	98.091	0	0.477
HUNTER	120	1.667	98.333	0	0	0	0
HUONG	125	0.8	0.8	0	98.4	0	0
HUSSEIN	49	0	69.388	14.286	16.327	0	0
HUY	110	0	0.909	0	99.091	0	0
HUYEN	34	0	0	0	100	0	0
HWA	30	0	0	0	100	0	0
HYE	53	0	11.321	0	88.679	0	0
HYO	34	0	2.941	0	97.059	0	0
HYUN	119	0.84	2.521	0	95.798	0.84	0
HYUNG	39	0	5.128	0	94.872	0	0
IAIN	47	0	100	0	0	0	0
IAN	1156	0.779	93.166	2.855	2.855	0	0.346
IBRAHIM	83	1.205	65.06	13.253	19.277	1.205	0
IDA	273	13.187	64.103	15.018	6.593	0.733	0.366
IDALIA	32	78.125	18.75	0	3.125	0	0
IGNACIO	332	90.06	7.229	0	2.711	0	0
IGOR	291	2.062	96.907	0	1.031	0	0
IHOR	19	0	100	0	0	0	0
ILA	80	0	85	0	12.5	1.25	1.25
ILAN	36	0	100	0	0	0	0
ILANA	53	1.887	96.226	0	1.887	0	0
ILEANA	69	63.768	36.232	0	0	0	0
ILENE	157	1.274	95.541	1.274	1.274	0	0.637
ILIANA	45	80	20	0	0	0	0
ILIAS	15	0	100	0	0	0	0
ILONA	74	4.054	93.243	2.703	0	0	0
ILYA	67	1.493	98.507	0	0	0	0
IMAD	38	0	76.316	0	23.684	0	0
IMELDA	181	49.724	16.022	2.21	31.492	0.552	0
IMOGENE	38	5.263	71.053	21.053	2.632	0	0
IMRAN	54	0	37.037	3.704	59.259	0	0
IN	70	0	2.857	0	97.143	0	0
INA	105	1.905	80	13.333	4.762	0	0
INDERJIT	43	0	18.605	0	76.744	4.651	0
INDIA	30	6.667	53.333	40	0	0	0
INDIRA	53	9.434	26.415	3.774	54.717	5.66	0
INES	83	57.831	33.735	3.614	4.819	0	0
INEZ	100	19	46	30	4	0	1
INGA	47	0	89.362	4.255	2.128	2.128	2.128
INGE	49	0	93.878	2.041	4.082	0	0
INGEBORG	47	2.128	97.872	0	0	0	0
INGRID	391	13.043	73.657	8.951	3.581	0	0.767
INNA	102	0	99.02	0	0.98	0	0
IOAN	60	0	100	0	0	0	0
IOANA	24	0	100	0	0	0	0
IOANNIS	33	3.03	96.97	0	0	0	0
IQBAL	35	0	28.571	0	68.571	2.857	0
IRA	341	0.88	88.27	9.677	0.88	0.293	0
IRENA	73	1.37	97.26	0	1.37	0	0
IRENE	1365	16.85	71.136	3.81	7.985	0.073	0.147
IRINA	312	2.244	95.833	0	1.923	0	0
IRIS	369	27.371	53.388	10.569	7.588	0.542	0.542
IRMA	601	73.71	20.3	3.827	2.163	0	0
IRVIN	111	4.505	71.171	22.523	1.802	0	0
IRVING	112	16.964	66.071	12.5	2.679	1.786	0
IRWIN	103	0	84.466	3.883	11.65	0	0
IRYNA	38	0	100	0	0	0	0
ISAAC	438	25.114	52.283	16.21	5.708	0.457	0.228
ISABEL	431	60.557	33.875	0.696	4.64	0.232	0
ISABELLA	66	10.606	74.242	3.03	10.606	1.515	0
ISABELLE	91	3.297	87.912	4.396	4.396	0	0
ISAIAH	55	9.091	40	49.091	1.818	0	0
ISAIAS	67	92.537	4.478	1.493	1.493	0	0
ISELA	37	91.892	5.405	0	2.703	0	0
ISIDRO	156	89.744	5.769	0	4.487	0	0
ISMAEL	299	88.294	8.027	0	3.679	0	0
ISMAIL	39	0	58.974	17.949	23.077	0	0
ISRAEL	283	72.438	22.968	2.827	1.413	0.353	0
ISSA	30	0	83.333	0	13.333	3.333	0
ISSAC	31	35.484	38.71	22.581	0	3.226	0
IVA	53	1.887	94.34	3.774	0	0	0
IVAN	714	28.151	60.364	4.902	6.583	0	0
IVANA	34	2.941	79.412	5.882	11.765	0	0
IVETTE	66	57.576	37.879	3.03	1.515	0	0
IVONNE	60	55	40	1.667	1.667	0	1.667
IVORY	30	0	13.333	83.333	3.333	0	0
IVY	154	6.494	50.649	14.935	26.623	0	1.299
IWONA	44	2.273	97.727	0	0	0	0
JACALYN	75	0	93.333	6.667	0	0	0
JACE	35	0	97.143	0	2.857	0	0
JACEK	71	1.408	97.183	0	0	1.408	0
JACINTA	32	31.25	18.75	34.375	15.625	0	0
JACINTO	38	63.158	15.789	0	21.053	0	0
JACK	3253	1.045	93.298	0.984	4.211	0.215	0.246
JACKI	44	2.273	97.727	0	0	0	0
JACKIE	830	1.928	87.711	4.819	4.578	0.482	0.482
JACKLYN	93	3.226	87.097	4.301	4.301	0	1.075
JACKSON	156	3.205	66.026	11.538	19.231	0	0
JACKY	38	0	52.632	2.632	44.737	0	0
JACLYN	352	1.136	95.739	0.852	1.705	0.568	0
JACOB	1962	3.007	91.845	1.631	3.211	0.153	0.153
JACQUE	59	3.39	91.525	5.085	0	0	0
JACQUELIN	44	9.091	79.545	9.091	0	2.273	0
JACQUELINE	3709	5.635	80.318	11.863	1.833	0.135	0.216
JACQUELYN	695	2.014	86.331	10.791	0.719	0.144	0
JACQUELYNN	37	2.703	94.595	0	2.703	0	0
JACQUES	149	4.027	72.483	21.477	2.013	0	0
JACY	15	0	100	0	0	0	0
JADA	30	0	76.667	23.333	0	0	0
JADE	93	2.151	78.495	4.301	15.054	0	0
JADWIGA	38	0	100	0	0	0	0
JAE	165	0	11.515	0.606	87.879	0	0
JAGDISH	41	0	26.829	0	73.171	0	0
JAI	44	0	34.091	2.273	63.636	0	0
JAIME	1561	49.327	44.971	0.448	4.933	0.128	0.192
JAIMEE	32	3.125	84.375	3.125	9.375	0	0
JAIMIE	77	3.896	90.909	3.896	1.299	0	0
JAIRO	64	96.875	3.125	0	0	0	0
JAKE	179	2.793	88.827	2.793	5.587	0	0
JAMAL	97	3.093	49.485	27.835	18.557	0	1.031
JAMEE	27	0	100	0	0	0	0
JAMES	45722	1	94.016	3.279	1.472	0.116	0.118
JAMEY	80	1.25	97.5	0	1.25	0	0
JAMI	217	0.461	97.696	1.382	0.461	0	0
JAMIE	2982	2.012	94.467	1.576	1.643	0.168	0.134
JAMIL	36	2.778	55.556	19.444	22.222	0	0
JAMILA	42	0	35.714	52.381	11.905	0	0
JAMISON	62	1.613	96.774	0	1.613	0	0
JAN	1337	0.374	97.008	0.598	1.795	0.075	0.15
JANA	666	1.652	96.096	1.351	0.15	0.601	0.15
JANAE	46	2.174	93.478	2.174	2.174	0	0
JANE	3863	0.88	93.968	0.984	3.779	0.181	0.207
JANEEN	91	2.198	89.011	7.692	1.099	0	0
JANEL	140	2.143	91.429	5	1.429	0	0
JANELL	150	2	90	7.333	0.667	0	0
JANELLE	461	2.386	91.974	3.688	1.735	0.217	0
JANENE	57	0	94.737	1.754	1.754	1.754	0
JANET	6368	2.041	93.153	2.575	1.963	0.126	0.141
JANETTE	323	9.598	83.282	3.096	4.025	0	0
JANEY	32	0	93.75	3.125	3.125	0	0
JANI	16	0	100	0	0	0	0
JANICE	4085	1.077	90.845	6.022	1.714	0.171	0.171
JANIE	289	8.997	74.394	10.727	4.844	1.038	0
JANINA	65	6.154	89.231	0	4.615	0	0
JANINE	548	0.912	94.343	3.285	1.277	0	0.182
JANIS	631	0.634	93.661	2.853	2.694	0	0.158
JANN	43	0	90.698	4.651	4.651	0	0
JANNA	196	0.51	95.408	1.02	1.02	0.51	1.531
JANNETTE	36	27.778	61.111	8.333	2.778	0	0
JANUSZ	53	0	100	0	0	0	0
JAQUELINE	49	24.49	67.347	6.122	2.041	0	0
JARED	1200	1.167	96.25	1.083	0.667	0.25	0.583
JARETT	16	0	100	0	0	0	0
JAROD	52	0	100	0	0	0	0
JAROSLAW	56	0	100	0	0	0	0
JARRED	49	0	93.878	6.122	0	0	0
JARRETT	97	2.062	85.567	12.371	0	0	0
JARROD	194	1.031	94.845	2.062	1.546	0.515	0
JARVIS	43	0	46.512	51.163	2.326	0	0
JASBIR	36	2.778	13.889	0	77.778	5.556	0
JASEN	35	2.857	94.286	0	2.857	0	0
JASMIN	70	15.714	55.714	5.714	22.857	0	0
JASMINE	148	10.811	44.595	22.297	21.622	0	0.676
JASON	11815	1.667	93.542	1.574	2.861	0.161	0.195
JASPER	58	1.724	68.966	22.414	6.897	0	0
JASWINDER	61	0	13.115	1.639	78.689	6.557	0
JATINDER	40	0	27.5	0	70	2.5	0
JAVIER	1001	94.505	4.895	0	0.5	0.1	0
JAY	2625	1.41	91.962	0.838	5.219	0.267	0.305
JAYANT	32	0	28.125	0	65.625	3.125	3.125
JAYE	39	0	92.308	5.128	2.564	0	0
JAYESH	44	0	9.091	0	84.091	4.545	2.273
JAYME	128	2.344	96.094	1.563	0	0	0
JAYNE	423	1.182	95.508	0.473	2.128	0	0.709
JAYSON	178	2.809	85.393	1.685	9.551	0.562	0
JEAN	3687	1.492	87.361	7.567	3.228	0.163	0.19
JEANA	62	3.226	93.548	0	3.226	0	0
JEANETTE	1151	5.908	83.406	8.688	1.651	0.261	0.087
JEANIE	142	2.113	92.254	1.408	3.521	0	0.704
JEANINE	371	0.27	93.531	5.391	0.539	0	0.27
JEANMARIE	61	0	95.082	3.279	1.639	0	0
JEANNA	88	2.273	94.318	2.273	1.136	0	0
JEANNE	1938	0.568	96.388	0.98	1.909	0.155	0
JEANNETTE	427	9.368	84.075	4.45	1.874	0.234	0
JEANNIE	393	4.58	82.952	1.272	10.941	0	0.254
JEANNINE	302	0	97.351	1.987	0.662	0	0
JEB	24	0	100	0	0	0	0
JED	124	0	100	0	0	0	0
JEDIDIAH	34	0	94.118	2.941	2.941	0	0
JEE	16	0	0	0	100	0	0
JEFF	1924	0.884	95.218	0.572	3.067	0.156	0.104
JEFFEREY	38	0	89.474	5.263	5.263	0	0
JEFFERSON	164	1.829	82.317	5.488	9.756	0	0.61
JEFFERY	1981	0.606	94.346	3.584	1.212	0.202	0.05
JEFFREY	18401	0.69	96.739	1.022	1.315	0.109	0.125
JEFFRY	239	0.837	94.979	0	2.51	1.255	0.418
JELENA	28	0	100	0	0	0	0
JENA	77	1.299	89.61	5.195	3.896	0	0
JENELL	31	3.226	74.194	22.581	0	0	0
JENELLE	52	5.769	84.615	9.615	0	0	0
JENIFER	274	1.095	97.08	1.46	0	0.365	0
JENINE	40	0	97.5	2.5	0	0	0
JENNA	360	1.944	95.833	0.833	1.389	0	0
JENNI	47	8.511	87.234	0	4.255	0	0
JENNIE	433	6.697	79.908	2.54	9.931	0.462	0.462
JENNIFER	19356	1.943	94.436	1.199	2.216	0.072	0.134
JENNINE	16	0	100	0	0	0	0
JENNY	1020	7.255	69.216	0.686	22.549	0	0.294
JENS	59	0	100	0	0	0	0
JEONG	53	0	0	0	100	0	0
JERAD	31	0	96.774	3.226	0	0	0
JERALD	287	0.697	95.819	2.787	0.348	0	0.348
JERE	59	0	98.305	0	1.695	0	0
JEREMIAH	496	1.815	92.339	4.032	1.411	0	0.403
JEREMY	3584	1.451	96.596	1.116	0.642	0.084	0.112
JERI	321	1.869	94.704	1.558	1.558	0.312	0
JERILYN	65	0	100	0	0	0	0
JERMAINE	69	4.348	5.797	88.406	1.449	0	0
JEROD	43	4.651	95.349	0	0	0	0
JEROLD	85	1.176	97.647	0	1.176	0	0
JEROME	1220	1.557	82.295	12.541	3.279	0.082	0.246
JEROMY	26	0	100	0	0	0	0
JERRE	18	0	100	0	0	0	0
JERRI	137	0.73	89.781	7.299	2.19	0	0
JERRIE	32	3.125	93.75	0	3.125	0	0
JERROD	61	0	93.443	6.557	0	0	0
JERROLD	113	0	98.23	0.885	0.885	0	0
JERRY	4262	2.44	89.465	4.505	3.332	0.164	0.094
JERZY	76	0	100	0	0	0	0
JESS	184	10.326	85.326	0.543	3.804	0	0
JESSE	1975	12.203	79.089	6.177	2.228	0.152	0.152
JESSICA	5451	7.375	88.901	1.413	1.981	0.11	0.22
JESSIE	445	9.663	61.798	17.079	11.011	0.225	0.225
JESSY	38	13.158	31.579	0	55.263	0	0
JESUS	1870	93.155	3.904	0	2.781	0.16	0
JEWEL	100	1	67	27	3	1	1
JEWELL	67	0	80.597	19.403	0	0	0
JI	71	0	2.817	0	97.183	0	0
JIA	78	0	2.564	0	97.436	0	0
JIAN	267	0	0.375	0	99.625	0	0
JIANGUO	15	0	0	0	100	0	0
JIANHUA	16	0	0	0	100	0	0
JIANWEI	15	0	0	0	100	0	0
JIE	154	0	2.597	0	97.403	0	0
JIGNESH	39	0	15.385	0	84.615	0	0
JILL	4229	0.52	98.156	0.544	0.591	0.095	0.095
JILLIAN	324	1.235	95.679	1.543	1.543	0	0
JIM	814	4.054	82.31	1.843	11.548	0.246	0
JIMMIE	406	2.217	78.818	17.488	1.232	0	0.246
JIMMY	1352	8.21	67.456	6.879	16.79	0.518	0.148
JIN	275	0.727	4	0	95.273	0	0
JING	198	1.01	3.03	0	95.96	0	0
JITENDRA	40	0	12.5	0	87.5	0	0
JO	486	1.44	93.827	2.675	1.44	0.412	0.206
JOAN	4057	0.887	94.405	3.204	1.232	0.099	0.173
JOANI	15	0	100	0	0	0	0
JOANIE	56	0	96.429	0	3.571	0	0
JOANN	1852	2.916	89.849	4.698	1.998	0.216	0.324
JOANNA	981	5.403	86.85	1.835	5.708	0.102	0.102
JOANNE	2914	1.922	92.862	1.784	3.329	0	0.103
JOAO	112	20.536	70.536	7.143	1.786	0	0
JOAQUIM	33	9.091	87.879	0	3.03	0	0
JOAQUIN	218	85.321	9.174	0.459	4.128	0.917	0
JOCELYN	349	3.438	62.751	10.888	22.35	0	0.573
JODEE	31	0	96.774	0	3.226	0	0
JODELL	17	0	100	0	0	0	0
JODI	1314	0.761	97.108	0.304	1.522	0.152	0.152
JODIE	358	0.279	96.927	0.838	1.955	0	0
JODY	1055	0.853	97.441	0.664	0.664	0.284	0.095
JOE	1804	18.57	69.013	6.874	5.155	0.222	0.166
JOEL	2947	11.435	84.459	1.934	2.002	0.102	0.068
JOELLE	120	1.667	91.667	6.667	0	0	0
JOELLEN	115	0	99.13	0.87	0	0	0
JOERG	23	0	100	0	0	0	0
JOETTA	31	9.677	80.645	6.452	3.226	0	0
JOETTE	22	0	100	0	0	0	0
JOEY	295	8.136	77.627	2.373	11.864	0	0
JOHAN	61	8.197	85.246	0	6.557	0	0
JOHANN	46	6.522	78.261	6.522	8.696	0	0
JOHANNA	364	9.066	83.791	2.473	4.121	0.275	0.275
JOHANNES	93	1.075	91.398	0	7.527	0	0
JOHN	51696	1.729	94.384	1.729	1.932	0.124	0.101
JOHNA	18	0	100	0	0	0	0
JOHNATHAN	182	3.297	81.868	9.341	5.495	0	0
JOHNATHON	46	2.174	91.304	0	6.522	0	0
JOHNIE	38	0	68.421	26.316	5.263	0	0
JOHNNA	72	0	95.833	4.167	0	0	0
JOHNNIE	304	3.289	59.211	36.184	0.329	0.658	0.329
JOHNNY	1088	13.051	60.386	13.603	12.224	0.551	0.184
JOHNPAUL	15	0	100	0	0	0	0
JOHNSON	78	1.282	19.231	12.821	66.667	0	0
JOI	32	3.125	71.875	25	0	0	0
JOLANTA	66	0	98.485	0	1.515	0	0
JOLEEN	55	0	98.182	1.818	0	0	0
JOLENE	283	2.12	93.993	1.413	2.12	0.353	0
JOLIE	69	1.449	89.855	4.348	4.348	0	0
JOLINE	15	0	100	0	0	0	0
JOLYN	24	0	100	0	0	0	0
JOLYNN	59	1.695	98.305	0	0	0	0
JON	2888	1.004	96.157	0.727	1.904	0.139	0.069
JONAH	57	1.754	94.737	0	3.509	0	0
JONAS	98	4.082	78.571	9.184	8.163	0	0
JONATHAN	6381	2.492	91.835	1.912	3.51	0.078	0.172
JONATHON	255	2.353	95.686	0.784	1.176	0	0
JONELLE	32	3.125	96.875	0	0	0	0
JONG	110	0	0.909	0.909	98.182	0	0
JONI	381	1.05	94.226	2.1	2.625	0	0
JONNA	63	1.587	93.651	1.587	3.175	0	0
JOO	37	0	0	0	100	0	0
JOON	47	0	2.128	0	95.745	0	2.128
JORDAN	708	1.271	96.751	0.706	0.989	0.141	0.141
JORGE	1955	90.026	8.696	0.153	1.125	0	0
JORY	23	0	100	0	0	0	0
JOSE	8642	89.829	7.244	0.289	2.534	0.081	0.023
JOSEF	100	0	96	1	3	0	0
JOSEFA	40	70	15	0	15	0	0
JOSEFINA	285	74.386	8.772	0.351	16.14	0	0.351
JOSELITO	50	30	8	0	62	0	0
JOSEPH	22172	2.936	92.139	2.553	2.12	0.144	0.108
JOSEPHINE	875	11.429	69.486	8.686	9.829	0.457	0.114
JOSETTE	46	4.348	56.522	34.783	4.348	0	0
JOSH	400	1.5	96.75	1	0.5	0.25	0
JOSHUA	5283	2.063	95.722	0.909	1.098	0.133	0.076
JOSIAH	72	2.778	83.333	9.722	2.778	1.389	0
JOSIE	117	23.077	57.265	12.821	5.983	0	0.855
JOSLYN	30	0	86.667	10	3.333	0	0
JOSUE	102	88.235	3.922	4.902	2.941	0	0
JOVITA	50	60	16	4	20	0	0
JOY	1362	1.322	86.564	6.241	5.727	0	0.147
JOYCE	3388	0.974	85.596	9.534	3.689	0.177	0.03
JOYCELYN	36	5.556	52.778	30.556	5.556	5.556	0
JOZEF	81	2.469	97.531	0	0	0	0
JUAN	4019	93.406	4.528	0.523	1.518	0.025	0
JUANA	382	86.387	10.733	1.571	1.309	0	0
JUANITA	646	21.827	54.954	19.659	2.477	0.31	0.774
JUANITO	31	19.355	3.226	0	77.419	0	0
JUDAH	22	0	100	0	0	0	0
JUDD	65	1.538	98.462	0	0	0	0
JUDE	90	7.778	73.333	12.222	6.667	0	0
JUDI	135	0	98.519	0.741	0.741	0	0
JUDIE	41	2.439	82.927	9.756	4.878	0	0
JUDITH	5763	2.603	94.76	1.544	0.746	0.174	0.174
JUDSON	78	1.282	97.436	1.282	0	0	0
JUDY	3320	1.867	90.572	2.651	4.699	0.09	0.12
JUERGEN	32	0	100	0	0	0	0
JULEE	46	2.174	97.826	0	0	0	0
[truncated: 2,252 more rows]
