# Supplementary material
Source: ML conference proceedings conference paper supplement (https://proceedings.neurips.cc/paper_files/paper/2022/hash/17a234c91f746d9625a75cf8a8731ee2-Abstract.html)
Supplement: Supplementary file 1 [file 17a234c91f746d9625a75cf8a8731ee2-Supplemental-Conference.zip › NeurIPS_2022_supplement/code/Homogenization-main/src/schema.py]

from typing import Any, Dict

from quinine.common.cerberus import default, merge, nullable, tboolean, tfloat, tinteger, tlist, tstring

def get_train_schema() -> Dict[str, Any]:
	schema = {
		"seed": merge(tinteger, nullable, default(21)),
		"output_dir": merge(tstring, nullable, default("")),
		"cluster": merge(tboolean, nullable, default(True)),
	}

	return schema
