# Supplementary material
Source: ML conference proceedings conference paper supplement (https://proceedings.neurips.cc/paper_files/paper/2022/hash/17a234c91f746d9625a75cf8a8731ee2-Abstract.html)
Supplement: Supplementary file 1 [file 17a234c91f746d9625a75cf8a8731ee2-Supplemental-Conference.zip › NeurIPS_2022_supplement/code/Homogenization-main/src/toy_nlp.py]

from adaptation_nlp import train
from data_nlp import load_datasets


if __name__ == '__main__':
	seed = 1
	output_dir = 'test'
	cache_dir = '/nlp/scr/rishibommasani/homogenization-cache'

	print(seed, output_dir, cache_dir)

	for dataset_name in ['imdb']: 
		train_dataset, test_dataset, num_labels = load_datasets(dataset_name, seed, cache_dir = cache_dir)
		for adaptation_method in ['finetuning', 'probing']:
			train(dataset_name, train_dataset, test_dataset, num_labels, adaptation_method, seed, output_dir, cache_dir = cache_dir)
