# Supplementary material
Source: ML conference proceedings conference paper supplement (https://proceedings.neurips.cc/paper_files/paper/2022/hash/17a234c91f746d9625a75cf8a8731ee2-Abstract.html)
Supplement: Supplementary file 1 [file 17a234c91f746d9625a75cf8a8731ee2-Supplemental-Conference.zip › NeurIPS_2022_supplement/code/Homogenization-main/src/train_nlp.py]

from quinine import Quinfig, QuinineArgumentParser
from schema import  get_train_schema
from adaptation_nlp import train
from data_nlp import load_datasets
from pathlib import Path
from tqdm import tqdm

if __name__ == '__main__':
	quinfig = QuinineArgumentParser(schema=get_train_schema()).parse_quinfig()
	seed = quinfig.seed
	output_dir = quinfig.output_dir
	if quinfig.cluster:
		cache_dir = '/nlp/scr/rishibommasani/homogenization-cache'
	else:
		cache_dir = None

	print(seed, output_dir, cache_dir)

	for dataset_name in tqdm(['agnews', 'imdb', 'hatespeech', 'yahoo']): 
		train_dataset, test_dataset, num_labels = load_datasets(dataset_name, seed, cache_dir = cache_dir)
		for adaptation_method in tqdm(['probing', 'bitfit', 'finetuning']):
			train(dataset_name, train_dataset, test_dataset, num_labels, adaptation_method, seed, output_dir, cache_dir = cache_dir)
