# Supplementary material
Source: ML conference proceedings conference paper supplement (https://proceedings.neurips.cc/paper_files/paper/2022/hash/17a234c91f746d9625a75cf8a8731ee2-Abstract.html)
Supplement: Supplementary file 1 [file 17a234c91f746d9625a75cf8a8731ee2-Supplemental-Conference.zip › NeurIPS_2022_supplement/code/Homogenization-main/src/train_nlp.sh]

#!/bin/bash

# CONDA_ENV="rishi"

for i in {1..5}
  do
    CMD="nlprun -a rishi -g 1 -p high -r 24G -o logs-new/$i.log -q jag -d titanxp -n lr2-$i 'python3 train_nlp.py --config conf/train_nlp.yaml --seed $i'"
    eval $CMD
  done
