# Supplementary material
Source: ML conference proceedings conference paper supplement (https://proceedings.neurips.cc/paper_files/paper/2022/hash/17a234c91f746d9625a75cf8a8731ee2-Abstract.html)
Supplement: Supplementary file 1 [file 17a234c91f746d9625a75cf8a8731ee2-Supplemental-Conference.zip › NeurIPS_2022_supplement/code/Homogenization-main/src/word_list.py]

male_words = {"he", "son", "his", "him", "father", "man", "boy", "himself", "male", "brother", "sons", "fathers", "men", "boys", "males", "brothers", "uncle", "uncles", "nephew", "nephews"}
female_words = {"she", "daughter", "hers", "her", "mother", "woman", "girl", "herself", "female", "sister", "daughters", "mothers", "women", "girls", "femen", "sisters", "aunt", "aunts", "niece", "nieces"}

all_names =  {'stanislav', 'pietro', 'ruby', 'chantal', 'millie', 'lauren', 'paresh', 'rosemarie', 'warren', 'marylynn', 'kim', 'waltraud', 'ilan', 'ernestina', 'toby', 'thurman', 'grigoriy', 'karry', 'nguyen', 'silvia', 'virgilio', 'corbin', 'carter', 'nalini', 'latrice', 'enrico', 'chadwick', 'lara', 'sharon', 'pam', 'edgar', 'tomasz', 'shad', 'jacob', 'rustin', 'camilla', 'sonal', 'camille', 'marni', 'janie', 'thinh', 'adriana', 'torrey', 'sona', 'mihaela', 'nhu', 'silas', 'dann', 'harry', 'kevan', 'dieu', 'randolph', 'rashid', 'cheryl', 'karl', 'lisandro', 'aldo', 'cherise', 'enid', 'adnan', 'chandler', 'natividad', 'karalee', 'fredy', 'edmundo', 'alysia', 'layne', 'tae', 'xiao', 'yevgeniya', 'andre', 'klaus', 'mireille', 'ba', 'zhuo', 'elizabeth', 'alyse', 'sanjeev', 'simone', 'darrick', 'tomas', 'moira', 'yao', 'jacki', 'brady', 'bailey', 'millard', 'karey', 'sheree', 'skyler', 'kee', 'mariya', 'lorrie', 'rhett', 'terry', 'suellen', 'hazel', 'omer', 'satish', 'kermit', 'ligia', 'salina', 'edna', 'ashlee', 'dionisio', 'feng', 'lincoln', 'rohan', 'santa', 'stuart', 'odell', 'hyo', 'benedict', 'xuejun', 'gary', 'raffi', 'yogesh', 'mabel', 'pennie', 'byung', 'dante', 'caleb', 'vincent', 'wieslaw', 'gideon', 'reggie', 'amos', 'courtney', 'duy', 'bernie', 'priya', 'zenaida', 'ying', 'louanne', 'nadeem', 'russ', 'angelita', 'annie', 'leon', 'cindee', 'anson', 'dario', 'maximino', 'margery', 'rui', 'konstantin', 'dzung', 'marita', 'wei', 'corrine', 'sami', 'ram', 'craig', 'cyril', 'les', 'yoshiko', 'juli', 'mostafa', 'mariann', 'josiah', 'abdul', 'tanisha', 'dorota', 'natalya', 'beverley', 'roseann', 'arnoldo', 'caterina', 'jenni', 'abigail', 'mike', 'gaetano', 'noe', 'kimberley', 'teressa', 'jaye', 'kacy', 'mason', 'ella', 'damian', 'leslie', 'sofia', 'georgianna', 'ly', 'svetlana', 'leonel', 'arie', 'alan', 'dong', 'everett', 'sushil', 'erwin', 'eyal', 'suman', 'aleta', 'wayne', 'diana', 'mehul', 'mia', 'see', 'cathryn', 'jewel', 'ning', 'leah', 'liliana', 'gabriella', 'rosetta', 'rafi', 'penni', 'willy', 'clarissa', 'fiona', 'ismail', 'josette', 'malinda', 'petar', 'dustin', 'marc', 'marcus', 'patty', 'winona', 'elliott', 'alta', 'catrina', 'gina', 'kamaljit', 'mieczyslaw', 'ibrahim', 'rosalie', 'liana', 'maryann', 'theo', 'meg', 'bryn', 'haley', 'rogelio', 'karol', 'jesus', 'caroline', 'annette', 'veena', 'bennett', 'sonny', 'phuoc', 'rajeev', 'rigoberto', 'amer', 'joann', 'kathrin', 'darnell', 'federico', 'inderjit', 'jeanmarie', 'montgomery', 'aruna', 'joseph', 'olena', 'miranda', 'rickie', 'valeri', 'venus', 'george', 'bibi', 'cari', 'selina', 'shaun', 'lorin', 'heriberto', 'hoan', 'sydney', 'segundo', 'bong', 'darwin', 'delbert', 'lee', 'sandhya', 'mickie', 'milind', 'jewell', 'delynn', 'mercy', 'dang', 'phan', 'miriam', 'alexa', 'brigette', 'su', 'britta', 'luciana', 'terri', 'jayme', 'iwona', 'joyce', 'yiu', 'georgette', 'heath', 'alejandra', 'dusty', 'georgia', 'steven', 'dominic', 'dylan', 'kiley', 'joan', 'florencio', 'magda', 'tomeka', 'jennie', 'sebastian', 'claudine', 'kerin', 'bonni', 'chinh', 'iryna', 'kirby', 'ari', 'alberto', 'bina', 'ernst', 'chia', 'karen', 'mi', 'stepan', 'scarlett', 'chih', 'irene', 'rafael', 'merideth', 'louella', 'stacie', 'carma', 'eleanor', 'raul', 'davin', 'wynne', 'rhea', 'darby', 'kenneth', 'stavros', 'luther', 'cristine', 'haim', 'keith', 'lottie', 'cherri', 'derek', 'birgitta', 'daria', 'dillon', 'dexter', 'fred', 'chun', 'leta', 'lian', 'miguel', 'wanda', 'blaise', 'yan', 'krista', 'lani', 'india', 'madelyn', 'lolita', 'pedro', 'wendell', 'jackie', 'muhammad', 'chung', 'yevgeniy', 'cristopher', 'mitra', 'ferdinand', 'lanette', 'nikola', 'debrah', 'hyung', 'madonna', 'yvonne', 'erinn', 'evangelos', 'edmond', 'joe', 'nedra', 'ty', 'akiko', 'johnnie', 'derik', 'chris', 'himanshu', 'lakisha', 'mattie', 'myles', 'betty', 'owen', 'nydia', 'lauralee', 'dave', 'veronika', 'warner', 'brennan', 'florian', 'kaushik', 'marvin', 'sallie', 'cleveland', 'danuta', 'jeanna', 'quang', 'allene', 'davis', 'marian', 'adele', 'hye', 'odessa', 'sanford', 'cristy', 'jefferson', 'stefan', 'brody', 'loreen', 'cordelia', 'brien', 'deidre', 'minnie', 'vickie', 'brianne', 'olivia', 'maritza', 'lula', 'kayleen', 'tammy', 'admir', 'rex', 'maher', 'sandra', 'frieda', 'monika', 'trudi', 'nhan', 'jin', 'marna', 'mu', 'ngoc', 'niki', 'maia', 'prasad', 'arne', 'asha', 'mila', 'roxane', 'kimball', 'faisal', 'violet', 'wieslawa', 'laurence', 'stephen', 'lyman', 'alaina', 'liam', 'clara', 'cathy', 'rosaura', 'starr', 'shara', 'noelle', 'loi', 'alexandria', 'pat', 'domenic', 'manh', 'delma', 'julius', 'kyla', 'irvin', 'conrado', 'ma', 'kaylyn', 'tamara', 'jerrie', 'srikanth', 'roshan', 'stephane', 'vern', 'kou', 'weiming', 'mathew', 'fe', 'wen', 'mikki', 'kerri', 'jacek', 'susanna', 'sheilah', 'nell', 'zachery', 'alanna', 'bobby', 'charleen', 'james', 'keenan', 'leeann', 'lilibeth', 'maximo', 'alecia', 'mitch', 'orlando', 'habib', 'xiaodong', 'traci', 'lory', 'kandace', 'len', 'mohan', 'ok', 'keiko', 'corazon', 'jeanie', 'saul', 'tristan', 'anjali', 'jairo', 'ezequiel', 'fidel', 'ivonne', 'forest', 'eula', 'hang', 'tresa', 'fae', 'donnell', 'carmelita', 'elyse', 'lita', 'yuri', 'faith', 'sylvester', 'gang', 'daisy', 'rosalba', 'concepcion', 'roxanna', 'renuka', 'lorne', 'geralyn', 'natasha', 'judah', 'hannah', 'kristoffer', 'yakov', 'bridgit', 'sherrill', 'tabatha', 'britton', 'nigel', 'scottie', 'genoveva', 'horace', 'mackenzie', 'zoran', 'theron', 'carroll', 'gilda', 'annetta', 'tariq', 'emad', 'harald', 'trent', 'syed', 'reza', 'carolyn', 'rob', 'creighton', 'jeana', 'martin', 'maureen', 'kaye', 'melinda', 'verne', 'jimmie', 'yanet', 'ginette', 'arlene', 'sandor', 'francesca', 'magdy', 'gisela', 'renae', 'tiffani', 'vita', 'diem', 'jann', 'raphael', 'steffany', 'yee', 'juan', 'treva', 'helen', 'gerri', 'mamie', 'susie', 'ed', 'molly', 'rana', 'sharyn', 'faustino', 'autumn', 'deann', 'judie', 'derick', 'zhiyong', 'talia', 'takashi', 'maren', 'serafin', 'wende', 'aimee', 'benny', 'judy', 'thuy', 'alvin', 'colin', 'jorge', 'davina', 'demetrius', 'hamid', 'duke', 'ernestine', 'jerome', 'myrtle', 'alvaro', 'alfredo', 'aram', 'leonora', 'lorenza', 'diego', 'meagan', 'marlin', 'farrah', 'joey', 'walter', 'anton', 'fei', 'usha', 'liesl', 'lea', 'ting', 'hao', 'gil', 'blanca', 'manuel', 'reinaldo', 'kieran', 'clifford', 'garrett', 'may', 'fermin', 'adam', 'jannette', 'lilian', 'lynne', 'emery', 'lana', 'sunil', 'soo', 'bernice', 'daniela', 'bernadine', 'esther', 'alexis', 'all other first names', 'jeremiah', 'effie', 'fonda', 'bryce', 'marcy', 'rowena', 'esmeralda', 'gordon', 'anand', 'jamey', 'jarod', 'ivan', 'marsha', 'marva', 'sari', 'audrey', 'stephany', 'melanie', 'winston', 'carolina', 'mardi', 'gigi', 'lissa', 'kathryne', 'nathaniel', 'karon', 'millicent', 'yves', 'alf', 'jianhua', 'harlan', 'bahram', 'roderic', 'dominick', 'gurpreet', 'michaelene', 'cristin', 'nanette', 'rama', 'al', 'inez', 'maximiliano', 'harvey', 'addie', 'mildred', 'roderick', 'tommy', 'tu', 'xi', 'frank', 'bret', 'porfirio', 'omar', 'sung', 'glen', 'pamela', 'padma', 'vinh', 'vahan', 'lowell', 'connie', 'nataliya', 'soon', 'susette', 'uday', 'edwina', 'natalie', 'wendy', 'bernardo', 'ronna', 'thad', 'solomon', 'nina', 'zhao', 'kory', 'jeromy', 'min', 'marlys', 'ericka', 'twila', 'clarke', 'nilesh', 'tara', 'oscar', 'herbert', 'jason', 'long', 'karlene', 'marko', 'romulo', 'adrienne', 'ariana', 'lela', 'camie', 'leroy', 'fariborz', 'ritchie', 'brigid', 'fan', 'mollie', 'myong', 'caron', 'shawn', 'arti', 'odette', 'ray', 'conor', 'megan', 'reena', 'grigor', 'alphonso', 'beckie', 'lawanda', 'ava', 'carlie', 'jarrett', 'lindy', 'cathleen', 'ronen', 'bertram', 'theodore', 'nicolette', 'sharron', 'sophia', 'trena', 'zhen', 'erlinda', 'joanie', 'xavier', 'mohamed', 'trudy', 'matthew', 'paramjit', 'jung', 'jie', 'youssef', 'omid', 'romy', 'shawnee', 'ravinder', 'weimin', 'mehdi', 'leila', 'marcella', 'boyd', 'rosann', 'rosalee', 'tana', 'yuk', 'callie', 'karyn', 'royal', 'william', 'laszlo', 'amita', 'ramiro', 'si', 'tyrone', 'amber', 'patsy', 'erika', 'sunita', 'candido', 'carrie', 'burt', 'merrie', 'shanon', 'shankar', 'dmitri', 'kandice', 'hana', 'andria', 'bessie', 'dana', 'josie', 'phil', 'mauro', 'prince', 'leif', 'carie', 'elpidio', 'ingeborg', 'sumit', 'essie', 'rafaela', 'tito', 'austin', 'aubrey', 'alberta', 'modesto', 'eddie', 'alireza', 'hun', 'ola', 'marlyn', 'adriane', 'jaclyn', 'declan', 'chasity', 'lelia', 'angela', 'paola', 'karim', 'kenny', 'antoinette', 'denver', 'michel', 'rekha', 'bhupinder', 'carmen', 'ruth', 'yana', 'shana', 'xia', 'filomena', 'violetta', 'gabriela', 'hetal', 'jeong', 'alana', 'madeline', 'hossein', 'madhu', 'narinder', 'elda', 'sylwia', 'yue', 'stacy', 'nickie', 'mikel', 'alfonso', 'georgi', 'neville', 'priscilla', 'keegan', 'lonny', 'loriann', 'maury', 'normand', 'allan', 'andrew', 'evelyn', 'garen', 'luiz', 'gaylord', 'branko', 'marietta', 'milena', 'jianwei', 'mitchel', 'pattie', 'sky', 'surendra', 'grzegorz', 'alicia', 'pablo', 'danita', 'brook', 'astrid', 'eleanore', 'manfred', 'karine', 'ted', 'valeria', 'vaishali', 'lorna', 'neelam', 'renate', 'shaina', 'elena', 'joellen', 'sabina', 'doris', 'carson', 'soraya', 'ka', 'ye', 'abbey', 'kandi', 'beverly', 'sabrina', 'anja', 'jerad', 'mindi', 'darlene', 'penny', 'marisela', 'kiet', 'esteban', 'ilias', 'domenick', 'eloy', 'jacquelynn', 'pawel', 'simona', 'weldon', 'lizette', 'ming', 'agata', 'ida', 'mustafa', 'gay', 'johann', 'nella', 'stefano', 'yuriy', 'sudhir', 'gudrun', 'carolynn', 'isabel', 'lonnie', 'jacky', 'zachary', 'sandi', 'stella', 'mac', 'dung', 'avi', 'gloria', 'joi', 'noah', 'nicolae', 'kathrine', 'nunzio', 'lyle', 'rick', 'shanti', 'julieta', 'camelia', 'logan', 'jamil', 'carin', 'rodney', 'travis', 'yin', 'trong', 'tony', 'blake', 'leona', 'belen', 'octaviano', 'rusty', 'phi', 'kristal', 'marya', 'thu', 'dwaine', 'cecily', 'duncan', 'vernon', 'venkat', 'sonia', 'lam', 'jermaine', 'anna', 'tammie', 'alexia', 'candy', 'reba', 'ariel', 'lyudmila', 'gaye', 'perla', 'ranae', 'alexey', 'thuc', 'joao', 'nichol', 'frances', 'asim', 'jodie', 'luis', 'ileana', 'ramon', 'rene', 'tanner', 'tisha', 'wesley', 'clarice', 'melchor', 'schuyler', 'shira', 'phyllis', 'wendee', 'micaela', 'samir', 'clinton', 'seok', 'ervin', 'justine', 'mazen', 'maciej', 'gwyneth', 'kelly', 'ronny', 'lynda', 'elliot', 'nai', 'errol', 'gia', 'ravindra', 'alonso', 'sergei', 'venessa', 'tod', 'farida', 'lars', 'janine', 'qing', 'dwight', 'ho', 'christal', 'douglas', 'edward', 'dawne', 'lauretta', 'krysta', 'roselyn', 'nellie', 'salvador', 'kyra', 'douglass', 'brittney', 'ofer', 'bharat', 'lucila', 'devin', 'aneta', 'tucker', 'vinay', 'dori', 'wes', 'tarek', 'julieann', 'ivette', 'martyn', 'mihai', 'lihua', 'holley', 'jenny', 'stanley', 'lisbeth', 'luigi', 'zoila', 'pia', 'miroslaw', 'gunnar', 'moshe', 'claus', 'arlette', 'kirstin', 'clifton', 'truc', 'garnet', 'fidencio', 'mable', 'joni', 'siobhan', 'abel', 'danial', 'pui', 'reid', 'ladonna', 'quyen', 'buck', 'can', 'sean', 'taryn', 'regina', 'marius', 'maurice', 'lu', 'ollie', 'alastair', 'yuliya', 'vien', 'michelle', 'rodolfo', 'avelino', 'joo', 'loni', 'louisa', 'prudence', 'pearl', 'jimmy', 'spiro', 'lise', 'kala', 'meridith', 'dulce', 'smita', 'marcelino', 'alina', 'jon', 'hubert', 'hunter', 'anneliese', 'rayna', 'giao', 'hina', 'hai', 'martha', 'hortencia', 'randi', 'marion', 'cleo', 'babak', 'delores', 'jadwiga', 'rosalinda', 'lucy', 'karma', 'gildardo', 'geoff', 'brendon', 'winnie', 'qian', 'milagros', 'vandana', 'marisa', 'carlee', 'sanjiv', 'giovanni', 'otis', 'jerre', 'milan', 'daron', 'rhoda', 'marylee', 'brenton', 'bogdan', 'bridgette', 'felipe', 'cris', 'hue', 'kendra', 'lola', 'annabel', 'cort', 'dariusz', 'massimo', 'russell', 'andreas', 'louann', 'selena', 'staci', 'denis', 'rosario', 'nisha', 'neha', 'bernardino', 'nona', 'roxanne', 'beatrice', 'wilda', 'ward', 'chi', 'bertrand', 'brett', 'hedy', 'isaac', 'janusz', 'vadim', 'christie', 'aparna', 'kurt', 'xochitl', 'donnie', 'donovan', 'peder', 'kelli', 'nita', 'frederick', 'mei', 'amal', 'bartley', 'larry', 'micheal', 'rodd', 'marybeth', 'sharad', 'cecile', 'mansour', 'dao', 'marcos', 'liz', 'song', 'sarina', 'young', 'panagiotis', 'geetha', 'suresh', 'gale', 'lai', 'anju', 'seung', 'herb', 'jillian', 'tracie', 'corine', 'lia', 'steffen', 'barbara', 'veronique', 'rajan', 'domingo', 'thang', 'weidong', 'remedios', 'dane', 'gonzalo', 'amelia', 'ge', 'roland', 'shelby', 'cindi', 'petra', 'carmela', 'blanche', 'constantine', 'hasan', 'trey', 'ani', 'tom', 'claudia', 'glenda', 'yasmin', 'tuyet', 'eli', 'maxwell', 'dyan', 'constance', 'max', 'ubaldo', 'jordan', 'annamarie', 'manjula', 'obdulia', 'tal', 'martine', 'de', 'neva', 'gennady', 'raisa', 'agatha', 'aurelio', 'sophie', 'sue', 'latanya', 'nelson', 'jae', 'varsha', 'deena', 'felix', 'garth', 'libby', 'goran', 'burton', 'shelley', 'leland', 'shahid', 'major', 'launa', 'khoa', 'charisse', 'chetan', 'patrica', 'hsiu', 'suzanna', 'michell', 'enrique', 'michele', 'larisa', 'regan', 'denice', 'lucille', 'cindy', 'brandon', 'laird', 'jeannine', 'fernanda', 'beatriz', 'mariam', 'lina', 'hailey', 'renea', 'darcie', 'elsa', 'dorothea', 'eunice', 'dorit', 'simon', 'carmine', 'harjinder', 'karissa', 'jeffry', 'louis', 'emmanuel', 'dorina', 'janae', 'mario', 'evan', 'eden', 'loreto', 'kyung', 'lynn', 'von', 'amin', 'xian', 'cordell', 'hattie', 'nicolle', 'greggory', 'luann', 'christos', 'patrice', 'sherwin', 'fawn', 'grazyna', 'ernest', 'thao', 'hilda', 'laureen', 'pasquale', 'brion', 'ursula', 'geneva', 'vidya', 'tobias', 'alka', 'marijo', 'daphne', 'nenita', 'elia', 'dian', 'tami', 'van', 'fatima', 'jai', 'nancy', 'deeann', 'narendra', 'chauncey', 'michael', 'sohail', 'allen', 'hugh', 'malcolm', 'nicki', 'abhijit', 'leandro', 'magaly', 'valeriy', 'renato', 'nan', 'carleton', 'corbett', 'rochelle', 'jacinto', 'neal', 'raja', 'glenna', 'shelli', 'marco', 'oren', 'shiloh', 'twyla', 'lyubov', 'abby', 'genevieve', 'iva', 'evette', 'starla', 'jenine', 'jun', 'yuan', 'zoe', 'marcelo', 'gheorghe', 'luc', 'robyn', 'marci', 'elisha', 'leslee', 'jacquelyn', 'candis', 'wang', 'helene', 'sylvie', 'bobbie', 'ada', 'darryl', 'freddie', 'carissa', 'rosalyn', 'huan', 'harris', 'allyson', 'mauricio', 'jian', 'grover', 'ivy', 'kulwant', 'sharen', 'isabella', 'lyndsey', 'ruthanne', 'san', 'jolanta', 'tak', 'mirna', 'seong', 'hwa', 'rommel', 'chin', 'jamila', 'tatum', 'saeed', 'emil', 'melvyn', 'marek', 'marianna', 'arianne', 'aleksandra', 'thi', 'anjanette', 'greta', 'peyton', 'alain', 'sharyl', 'issa', 'armida', 'rong', 'archie', 'cheng', 'marino', 'tamera', 'wilson', 'ian', 'neil', 'carlyn', 'raj', 'armen', 'ezra', 'ford', 'jaimie', 'christen', 'raymundo', 'anastasia', 'corie', 'judson', 'gaylene', 'alfred', 'lili', 'fernando', 'celia', 'marjory', 'gilberto', 'hong', 'regena', 'margo', 'melodie', 'rahul', 'leonor', 'arlyn', 'kellee', 'tri', 'tricia', 'malik', 'cole', 'khalid', 'aric', 'gordana', 'jia', 'reynold', 'hector', 'edwin', 'sabino', 'elio', 'meggan', 'consuelo', 'cecelia', 'rhonda', 'venkata', 'maura', 'maria', 'paulette', 'maricela', 'sergio', 'lyn', 'lonna', 'kishore', 'tyler', 'tao', 'patrick', 'farah', 'christianne', 'bert', 'chanda', 'deirdre', 'rudolf', 'skye', 'santiago', 'clare', 'arnaldo', 'kary', 'ke', 'lucio', 'eva', 'terrence', 'amit', 'bin', 'marilyn', 'mahmoud', 'mary', 'khanh', 'boguslaw', 'lauro', 'santo', 'kelsey', 'geoffrey', 'cesar', 'sawsan', 'august', 'waldemar', 'barry', 'jody', 'anthony', 'lona', 'stefanie', 'bettina', 'olivier', 'zhi', 'karli', 'lois', 'ajay', 'ignacio', 'frederic', 'akbar', 'anders', 'clay', 'myron', 'soledad', 'nick', 'donna', 'hollis', 'edilberto', 'niles', 'randall', 'duc', 'deborah', 'xiaofeng', 'hemant', 'arcelia', 'vivek', 'taylor', 'chu', 'tamika', 'jeff', 'reina', 'axel', 'levi', 'tawny', 'signe', 'antje', 'cristen', 'guillermina', 'celeste', 'christy', 'tamra', 'sasha', 'mayra', 'kenton', 'dolly', 'paulina', 'angel', 'lien', 'ashish', 'mindy', 'rena', 'tiffany', 'glynn', 'frankie', 'marcia', 'gretchen', 'hoang', 'mordechai', 'shu', 'katina', 'mikael', 'salvatore', 'ha', 'carla', 'christel', 'ivory', 'eleazar', 'qi', 'roxann', 'valorie', 'guy', 'terrell', 'yadira', 'dorcas', 'adan', 'colt', 'tonia', 'adria', 'florin', 'lianne', 'coleman', 'lixin', 'artur', 'holly', 'shay', 'silvana', 'anca', 'damaris', 'alia', 'kristin', 'parviz', 'irina', 'teena', 'poonam', 'mehrdad', 'cristie', 'dannette', 'carrol', 'mercedes', 'xu', 'brooks', 'leonard', 'damien', 'helga', 'stanislawa', 'maryam', 'debby', 'gilbert', 'srinivasa', 'bryan', 'justo', 'jonathon', 'gregory', 'chau', 'idalia', 'eldon', 'monroe', 'cristian', 'theresa', 'christiane', 'gabrielle', 'tatiana', 'nathan', 'thierry', 'nada', 'urszula', 'mervin', 'jasbir', 'lael', 'thien', 'laurin', 'xiaohong', 'wilburn', 'jaime', 'ilya', 'jodee', 'lou', 'danilo', 'rodrick', 'donato', 'eleni', 'laila', 'bill', 'louise', 'kamlesh', 'robbin', 'vahe', 'eric', 'lorinda', 'harold', 'meryl', 'jatinder', 'daniele', 'hae', 'leszek', 'lior', 'serge', 'adalberto', 'alden', 'tian', 'ana', 'loyd', 'jerzy', 'jonah', 'carmel', 'erica', 'marlene', 'sang', 'ciro', 'glenn', 'alexandra', 'kraig', 'herminia', 'fran', 'shannon', 'ami', 'danette', 'kendrick', 'conrad', 'kaitlin', 'marilou', 'bambi', 'anup', 'duong', 'kristyn', 'nathanael', 'jerod', 'lawrence', 'chuck', 'zoltan', 'dimitri', 'so', 'cornelia', 'lloyd', 'isela', 'franklin', 'daniella', 'terrance', 'virginia', 'estella', 'alane', 'bruce', 'parul', 'francois', 'teodoro', 'jackson', 'jerry', 'toan', 'darrell', 'berta', 'ilene', 'hani', 'evans', 'julien', 'enriqueta', 'deana', 'leticia', 'mathieu', 'dayna', 'noel', 'rich', 'alice', 'bernhard', 'chanh', 'walt', 'susannah', 'dick', 'horst', 'deric', 'jeanette', 'nadezhda', 'suzie', 'hau', 'yun', 'kai', 'elvira', 'jayant', 'ora', 'ruben', 'abner', 'ute', 'deepak', 'juanita', 'roseanna', 'udo', 'jules', 'shailesh', 'elton', 'hillary', 'dilip', 'francine', 'lavern', 'benson', 'sachin', 'rosalind', 'trisha', 'darrel', 'jacalyn', 'dalia', 'brandie', 'lucian', 'hoi', 'eduardo', 'reginald', 'phuong', 'wyatt', 'sonya', 'roseanne', 'shari', 'augustus', 'huy', 'bo', 'lisette', 'zach', 'joaquim', 'tuyen', 'eloise', 'elaine', 'raquel', 'uriel', 'andrei', 'abbas', 'shyam', 'jyoti', 'krystyna', 'gregg', 'geraldine', 'valentina', 'arif', 'artemio', 'reynaldo', 'silvio', 'mandi', 'patti', 'hamilton', 'socorro', 'thanh', 'an', 'israel', 'kathy', 'son', 'karan', 'matilde', 'rosemary', 'naomi', 'ronit', 'skylar', 'alisa', 'terence', 'heidi', 'leobardo', 'willard', 'mari', 'monty', 'christin', 'alessandro', 'rhiannon', 'seema', 'armand', 'mica', 'marcela', 'dmitriy', 'jada', 'delilah', 'ronaldo', 'carlo', 'giovanna', 'john', 'arkady', 'dara', 'gabriel', 'alissa', 'norman', 'vonda', 'barton', 'crystal', 'huyen', 'luca', 'evonne', 'jenna', 'khoi', 'fabio', 'aleksandr', 'cleve', 'ankur', 'ricky', 'brannon', 'chantelle', 'caesar', 'kip', 'ulysses', 'thomas', 'coral', 'stefani', 'basil', 'zhigang', 'paul', 'antonette', 'lan', 'araceli', 'charla', 'ki', 'lenard', 'arden', 'nguyet', 'konstantinos', 'hung', 'joanne', 'bridgett', 'grant', 'lillian', 'zhanna', 'umesh', 'zane', 'alec', 'marina', 'jessy', 'courtenay', 'jack', 'donita', 'anatoly', 'colette', 'hendrik', 'mahesh', 'kale', 'jill', 'arkadiusz', 'quoc', 'dawn', 'lacey', 'vicente', 'gus', 'brianna', 'kris', 'vilma', 'bernabe', 'freda', 'katrin', 'vivian', 'gautam', 'kathlyn', 'caren', 'salomon', 'graig', 'cristi', 'garry', 'ashley', 'ashton', 'velma', 'zhe', 'tien', 'carole', 'jay', 'burke', 'marti', 'benton', 'paula', 'rony', 'wilbert', 'aura', 'todd', 'brita', 'jasper', 'mihail', 'mirela', 'anatoliy', 'cecil', 'werner', 'krystle', 'sylvain', 'anh', 'elyssa', 'kerrie', 'afshin', 'andrea', 'georgene', 'minerva', 'henri', 'breanna', 'latasha', 'napoleon', 'charissa', 'josephine', 'rosa', 'avis', 'jacqueline', 'katarzyna', 'nadine', 'alba', 'cecilia', 'rosanna', 'alycia', 'xiong', 'jim', 'caitlin', 'delfino', 'alexander', 'nikolai', 'marilee', 'brice', 'josef', 'paulo', 'lukasz', 'lila', 'bijan', 'colton', 'dinesh', 'kit', 'hope', 'elwood', 'cristobal', 'emilio', 'felicitas', 'kinga', 'lei', 'arnulfo', 'melissa', 'harriet', 'mona', 'norberto', 'royce', 'hakop', 'renee', 'cornell', 'lane', 'beau', 'micahel', 'manju', 'wilmer', 'dan', 'keli', 'sheng', 'bing', 'bhavna', 'misti', 'mohsen', 'shawna', 'suzann', 'kenia', 'shirley', 'sondra', 'erma', 'fredric', 'trinh', 'mara', 'maryjane', 'hasmik', 'colby', 'delaine', 'maksim', 'margie', 'sandeep', 'xiomara', 'grace', 'norris', 'wilbur', 'barrie', 'loren', 'lissette', 'robby', 'thelma', 'arash', 'bethany', 'mohammed', 'carlin', 'ekaterina', 'jeannie', 'jerold', 'bradd', 'milos', 'quinn', 'leesa', 'cheri', 'marcie', 'cipriano', 'wendie', 'wilhelmina', 'nila', 'roma', 'erasmo', 'kiran', 'soren', 'robbie', 'bonita', 'keri', 'rebekah', 'ludmila', 'tibor', 'mickey', 'brian', 'nannette', 'wolfgang', 'mehran', 'sheila', 'jonelle', 'kara', 'moses', 'nghia', 'sriram', 'dwayne', 'vikas', 'sun', 'cosmo', 'trista', 'alonzo', 'koji', 'mariana', 'cami', 'leanne', 'sherry', 'gustavo', 'nasser', 'demetria', 'perry', 'jessica', 'dominique', 'suong', 'juliann', 'kathi', 'linette', 'abelardo', 'crista', 'scot', 'eve', 'kurtis', 'murali', 'chelsea', 'gricelda', 'margarito', 'navin', 'eloisa', 'leilani', 'pamala', 'elise', 'hank', 'annabelle', 'olga', 'shannan', 'norm', 'denny', 'mahendra', 'taunya', 'ioannis', 'homer', 'jesse', 'kristina', 'parker', 'shao', 'do', 'anne', 'amador', 'ellie', 'jere', 'kendall', 'matt', 'therese', 'gaylen', 'danny', 'majid', 'margaret', 'ricardo', 'risa', 'kristopher', 'sherril', 'art', 'neena', 'chastity', 'hollie', 'khalil', 'luisa', 'kymberly', 'teddy', 'lavon', 'sander', 'pradeep', 'ann', 'dat', 'etta', 'germaine', 'hing', 'kwok', 'dorinda', 'katerina', 'sameer', 'janene', 'mavis', 'benjamin', 'jean', 'virgina', 'katheryn', 'tabitha', 'francisco', 'hanna', 'rolando', 'chet', 'babette', 'garrick', 'jasmine', 'dania', 'jarred', 'lucinda', 'ned', 'phuc', 'christine', 'hayden', 'marilynn', 'aleksandar', 'sukhwinder', 'vijaya', 'angelika', 'digna', 'renu', 'asa', 'cruz', 'humberto', 'kirsten', 'gwyn', 'newton', 'zhiqiang', 'maggie', 'marisol', 'elva', 'alfreda', 'manoj', 'tameka', 'angeline', 'georgiana', 'will', 'jolyn', 'corrie', 'sunshine', 'quinton', 'rachele', 'vishal', 'zbigniew', 'flavia', 'jamison', 'timothy', 'ebony', 'emile', 'gino', 'shea', 'sheridan', 'brittany', 'claude', 'vera', 'nabil', 'mireya', 'murray', 'ralf', 'delmar', 'marzena', 'merrill', 'agustin', 'hoa', 'cheuk', 'kumar', 'leisa', 'stevan', 'samson', 'elisa', 'ilona', 'katherine', 'larue', 'jasmin', 'shauna', 'debi', 'rachelle', 'eliseo', 'amy', 'estela', 'adelina', 'huey', 'pascual', 'yaron', 'caridad', 'suzanne', 'savita', 'trung', 'javier', 'leighton', 'alida', 'celina', 'jennifer', 'giang', 'emanuel', 'kari', 'amina', 'shirlee', 'alexandr', 'shae', 'gwen', 'wan', 'suzan', 'earl', 'hassan', 'markus', 'anjana', 'bettie', 'surinder', 'tyra', 'stephanie', 'florentino', 'leonid', 'teodora', 'meghan', 'sherwood', 'arnold', 'bennie', 'steffanie', 'mariano', 'lindsey', 'salim', 'grayson', 'aline', 'graham', 'chelsey', 'kwong', 'fabian', 'graydon', 'buford', 'vincenza', 'josue', 'kristian', 'francesco', 'lakshmi', 'mimi', 'henryk', 'roberta', 'thuan', 'jozef', 'tho', 'altagracia', 'alesia', 'arno', 'blair', 'mohamad', 'chien', 'janice', 'ramona', 'monte', 'boris', 'dixie', 'shelagh', 'lyndsay', 'tedd', 'aurora', 'dieter', 'loan', 'julee', 'aileen', 'brienne', 'brad', 'noreen', 'darcy', 'fletcher', 'gerardo', 'abram', 'nettie', 'sangeeta', 'shuang', 'marissa', 'jeffery', 'herminio', 'josh', 'sergey', 'tran', 'marcello', 'milton', 'roscoe', 'walid', 'ruthie', 'kristine', 'derrick', 'zack', 'rafal', 'felicia', 'vladislav', 'claudio', 'dino', 'manu', 'rey', 'margarita', 'lionel', 'dax', 'melvin', 'philip', 'kaitlyn', 'flora', 'gavin', 'andres', 'herlinda', 'kalen', 'augustin', 'gerard', 'hugo', 'mikhail', 'patricio', 'ahmet', 'rashmi', 'catharine', 'christopher', 'darren', 'fredrick', 'cara', 'belinda', 'ut', 'carmelo', 'tera', 'jerri', 'emerson', 'elden', 'luke', 'vince', 'cyrus', 'dirk', 'johnpaul', 'mallory', 'vicki', 'windy', 'kellie', 'cassidy', 'retha', 'archana', 'sharlene', 'malissa', 'tan', 'althea', 'antonino', 'ismael', 'brenda', 'andriy', 'adel', 'sven', 'charles', 'jacinta', 'michal', 'woodrow', 'kacie', 'janel', 'arnel', 'bohdan', 'nadia', 'colleen', 'griselda', 'alexandru', 'sau', 'roger', 'jolene', 'glennon', 'concetta', 'dell', 'nicoletta', 'chantel', 'jacklyn', 'gennaro', 'selma', 'henrietta', 'stacia', 'da', 'breanne', 'jani', 'harinder', 'kirt', 'cornelio', 'sylvia', 'tong', 'jenifer', 'keisha', 'zachariah', 'adolph', 'reva', 'ashlie', 'natalia', 'miao', 'rosalina', 'tyson', 'domenico', 'kelley', 'tobin', 'barney', 'tate', 'sybil', 'allyn', 'ronald', 'edison', 'samira', 'vu', 'li', 'holli', 'dinah', 'randell', 'houston', 'josefina', 'vladimir', 'johnny', 'kyaw', 'reed', 'katharine', 'kira', 'celestino', 'mamta', 'mellisa', 'nga', 'nirmal', 'rose', 'vikki', 'jeffrey', 'bjorn', 'oliver', 'joleen', 'petr', 'scotty', 'woon', 'gilles', 'zofia', 'chloe', 'won', 'judith', 'amar', 'joelle', 'nilda', 'roosevelt', 'ila', 'dona', 'octavio', 'vanessa', 'galen', 'norma', 'meghann', 'ken', 'julianne', 'kristy', 'christi', 'oanh', 'quan', 'ramesh', 'cyndi', 'rosio', 'tram', 'valerie', 'randee', 'marylou', 'satya', 'yefim', 'joetta', 'juliana', 'earle', 'antonella', 'adelaide', 'jayesh', 'margot', 'sammy', 'veronica', 'gerd', 'piotr', 'ashok', 'elin', 'laurent', 'lucie', 'kelvin', 'rodrigo', 'patience', 'leanna', 'viktor', 'xin', 'mira', 'judi', 'esperanza', 'karie', 'hari', 'flavio', 'nils', 'tommie', 'zahra', 'doreen', 'britt', 'quynh', 'alex', 'carolann', 'irving', 'doug', 'joaquin', 'hua', 'janis', 'franz', 'tadd', 'crispin', 'antonietta', 'jacque', 'narciso', 'ulrike', 'dion', 'jenelle', 'helena', 'karleen', 'henry', 'karla', 'debbie', 'christoph', 'marleen', 'nestor', 'teryl', 'liane', 'madeleine', 'teresita', 'ganesh', 'jaimee', 'kenna', 'garret', 'sheryl', 'ginger', 'ashwin', 'gareth', 'dannie', 'zi', 'cedric', 'buffy', 'ritesh', 'nirmala', 'amalia', 'sook', 'jade', 'wilfred', 'chrystal', 'ina', 'annamaria', 'carlton', 'cary', 'herman', 'kenyon', 'christina', 'fen', 'leo', 'nicolas', 'xiang', 'becky', 'latisha', 'wilford', 'forrest', 'gwendolyn', 'linda', 'mariah', 'samer', 'karin', 'clemente', 'tamela', 'lesli', 'hee', 'danelle', 'preston', 'ghassan', 'sidney', 'tressa', 'loretta', 'roswitha', 'drake', 'madhavi', 'elzbieta', 'dorothy', 'elias', 'lorri', 'moises', 'nikolas', 'yang', 'rudolph', 'letitia', 'jasen', 'ngan', 'geronimo', 'johna', 'kathe', 'quincy', 'earlene', 'sherman', 'trina', 'wilfredo', 'darek', 'harriett', 'debora', 'jenell', 'johannes', 'guadalupe', 'kyle', 'alyssa', 'daren', 'irena', 'bahman', 'blythe', 'linwood', 'vitaliy', 'nitin', 'kacey', 'gregoria', 'britney', 'candelario', 'ivana', 'wing', 'rebeca', 'neeta', 'viki', 'carley', 'elissa', 'opal', 'vasile', 'ling', 'ewa', 'betsy', 'rodger', 'coy', 'bernard', 'shashi', 'sherrie', 'trenton', 'rolf', 'jocelyn', 'carlene', 'bart', 'kristie', 'randel', 'ronda', 'edmund', 'gaspar', 'christophe', 'micah', 'darla', 'evangelina', 'jagdish', 'angelina', 'octavia', 'jitendra', 'po', 'jerrod', 'rickey', 'shih', 'niall', 'witold', 'tetyana', 'monica', 'dionne', 'franco', 'prashant', 'qiu', 'shayne', 'lon', 'keely', 'sabine', 'maryanne', 'georg', 'cecilio', 'efren', 'alton', 'lamar', 'david', 'rohit', 'sara', 'dorene', 'stanislaw', 'jamie', 'sudha', 'estrella', 'jena', 'herve', 'mitzi', 'ji', 'cinda', 'paulino', 'drew', 'antonia', 'denton', 'caryn', 'isaiah', 'merritt', 'casey', 'kien', 'chang', 'marty', 'janet', 'kent', 'hany', 'oralia', 'anissa', 'johnna', 'pei', 'phillip', 'tamar', 'sherie', 'emilie', 'arsenio', 'audra', 'jens', 'ruthann', 'balaji', 'darian', 'truong', 'lesley', 'anderson', 'susana', 'cherrie', 'kyong', 'bree', 'rosanne', 'cameron', 'guillermo', 'janette', 'despina', 'rajesh', 'eliana', 'oleg', 'briana', 'sanjay', 'galina', 'giulio', 'kerry', 'rami', 'marshall', 'kathie', 'maya', 'hiroko', 'jeri', 'antony', 'maxine', 'reyes', 'alix', 'don', 'danica', 'lacy', 'marcin', 'inga', 'melody', 'kin', 'ping', 'aleksander', 'manuela', 'angelia', 'monique', 'rikki', 'roni', 'tushar', 'vivien', 'kylie', 'suk', 'evelia', 'barbra', 'adeline', 'gita', 'ester', 'arline', 'baltazar', 'cam', 'sarita', 'rolland', 'antonio', 'shon', 'danh', 'rosalio', 'rakesh', 'sherri', 'rosendo', 'juventino', 'lilly', 'lenora', 'edyta', 'franklyn', 'maribeth', 'parminder', 'vijay', 'maynard', 'lazaro', 'kori', 'baldev', 'curtis', 'tatyana', 'kathleen', 'rod', 'andra', 'cornelius', 'eddy', 'alyson', 'kambiz', 'oksana', 'armando', 'clive', 'candice', 'eleftherios', 'abe', 'mandy', 'sloane', 'raymond', 'nelda', 'rajendra', 'vasilios', 'binh', 'janey', 'eryn', 'graciela', 'amie', 'brijesh', 'heinz', 'jefferey', 'juliette', 'baxter', 'xun', 'robb', 'penelope', 'daniel', 'emilee', 'thea', 'delia', 'anselmo', 'eusebio', 'blaine', 'kayla', 'joani', 'garrison', 'avery', 'marlon', 'ellen', 'truman', 'bertha', 'lynette', 'candace', 'arvin', 'ashleigh', 'thong', 'amparo', 'ingrid', 'agnes', 'karina', 'augustine', 'jing', 'athanasios', 'dwain', 'suzette', 'brandi', 'roxana', 'jeanine', 'sen', 'vyacheslav', 'doan', 'peggy', 'rajinder', 'joel', 'vaughn', 'carri', 'rand', 'bettye', 'pierre', 'rina', 'jodi', 'jeb', 'horacio', 'marlo', 'joline', 'florence', 'cristina', 'aisha', 'janell', 'camilo', 'vidal', 'jace', 'leann', 'phoebe', 'katarina', 'viola', 'seng', 'lorie', 'johnie', 'shlomo', 'said', 'jaswinder', 'juana', 'nancie', 'peter', 'maribel', 'peggie', 'cathi', 'brenna', 'alen', 'elvin', 'jignesh', 'quy', 'wojciech', 'ihor', 'lucien', 'bethann', 'girish', 'jamal', 'katrina', 'dayle', 'kieu', 'leigh', 'per', 'johnathan', 'ryann', 'bridget', 'neeraj', 'kavitha', 'rollin', 'terese', 'eugene', 'troy', 'vahik', 'angelica', 'sherryl', 'sheri', 'ross', 'brandy', 'celso', 'masood', 'weston', 'kaylee', 'christa', 'juvenal', 'edith', 'roy', 'sierra', 'rocio', 'emory', 'fadi', 'maha', 'nevin', 'otto', 'raleigh', 'slavica', 'seymour', 'inge', 'irwin', 'theodora', 'qin', 'pascal', 'eun', 'tung', 'venkatesh', 'corina', 'constantin', 'ron', 'danielle', 'isidro', 'lupe', 'dina', 'arlie', 'angus', 'abraham', 'tena', 'carolee', 'beata', 'casimir', 'slobodan', 'marika', 'shelton', 'paris', 'beth', 'marguerite', 'morgan', 'marianne', 'daljit', 'nathalie', 'rosana', 'hoai', 'rory', 'vipul', 'harley', 'page', 'julissa', 'jan', 'kelle', 'rita', 'julia', 'abbie', 'gene', 'jennine', 'laurene', 'linsey', 'mukesh', 'imogene', 'shanna', 'nikolaus', 'teri', 'siamak', 'diep', 'piper', 'morris', 'rosalva', 'angie', 'mack', 'walker', 'oswaldo', 'shui', 'elke', 'tari', 'woo', 'yen', 'balwinder', 'jarvis', 'clyde', 'bryson', 'king', 'korey', 'shanda', 'thai', 'violeta', 'jacy', 'melonie', 'whitney', 'gena', 'ahmad', 'francis', 'murat', 'shayna', 'gerry', 'hyun', 'carey', 'dani', 'misty', 'zenon', 'keren', 'leonardo', 'livia', 'teresa', 'andrzej', 'xue', 'alphonse', 'ginny', 'laura', 'aaron', 'saverio', 'hallie', 'melisa', 'randa', 'arturo', 'corinna', 'sheela', 'lydia', 'adela', 'georgina', 'rosita', 'merry', 'pamella', 'sommer', 'tessa', 'lindsay', 'arlen', 'joycelyn', 'jonathan', 'fausto', 'emilia', 'jana', 'luanne', 'miles', 'damion', 'jolynn', 'eliza', 'portia', 'jed', 'siu', 'tarun', 'jaroslaw', 'preeti', 'vasyl', 'dorian', 'paolo', 'stanford', 'vida', 'tammi', 'melva', 'dianne', 'joanna', 'rosella', 'savannah', 'snezana', 'mitchell', 'carl', 'wendi', 'hipolito', 'diane', 'jodell', 'sarkis', 'manisha', 'justina', 'meaghan', 'bianca', 'elinor', 'cortney', 'amir', 'elana', 'susanne', 'hisham', 'alene', 'rachael', 'wallace', 'buddy', 'carmella', 'eugenio', 'robert', 'harpreet', 'melba', 'viviana', 'kitty', 'deloris', 'latonya', 'adelaida', 'muriel', 'aurelia', 'sai', 'pravin', 'lesly', 'seamus', 'adolfo', 'subhash', 'terra', 'amado', 'jonna', 'timmy', 'lino', 'jolie', 'dena', 'corinne', 'june', 'nickolas', 'karri', 'sarah', 'wiley', 'sandy', 'chuong', 'sergiy', 'tomislav', 'peng', 'lenny', 'seyed', 'tosha', 'milo', 'tia', 'eileen', 'agnieszka', 'cori', 'hilario', 'johan', 'johanna', 'santosh', 'julie', 'amarjit', 'jeremy', 'delana', 'doron', 'ryan', 'nikki', 'sigrid', 'steve', 'chad', 'guan', 'vance', 'chuan', 'evangeline', 'merle', 'rae', 'asif', 'lillie', 'tina', 'bipin', 'xiu', 'irma', 'shonda', 'kalpana', 'patricia', 'sheldon', 'nicola', 'ruslan', 'ardis', 'cynthia', 'hitesh', 'helmut', 'igor', 'khang', 'lucretia', 'ketan', 'diann', 'emily', 'iain', 'janelle', 'reagan', 'lavonne', 'hiep', 'hal', 'lora', 'my', 'wilma', 'reuben', 'collin', 'alma', 'dov', 'del', 'faye', 'roslyn', 'lex', 'blas', 'feliciano', 'brendan', 'raju', 'garland', 'clair', 'lin', 'charley', 'jake', 'kavita', 'zina', 'norine', 'sally', 'shin', 'barrett', 'bradford', 'lori', 'yvette', 'chance', 'magdalena', 'cliff', 'thaddeus', 'malgorzata', 'joslyn', 'rian', 'tamie', 'leopoldo', 'richelle', 'ulises', 'liv', 'manpreet', 'huong', 'jerald', 'viet', 'alyce', 'ioan', 'emiliano', 'adina', 'laverne', 'martina', 'philippe', 'kristi', 'loree', 'romeo', 'darci', 'dragan', 'uwe', 'ajit', 'dora', 'antonina', 'braden', 'cassandra', 'cirilo', 'janna', 'kam', 'liming', 'vitaly', 'corrin', 'dedra', 'lorraine', 'albert', 'elie', 'jeannette', 'melina', 'floyd', 'ranjit', 'cuong', 'fanny', 'marlena', 'hien', 'darko', 'laurel', 'coleen', 'marjorie', 'nikhil', 'bryon', 'benedetto', 'francisca', 'claudette', 'konrad', 'linnea', 'marla', 'meredith', 'michale', 'naresh', 'nikole', 'jee', 'geeta', 'rajiv', 'kate', 'lorena', 'vinod', 'donal', 'nolan', 'prem', 'norbert', 'jonas', 'candi', 'everardo', 'nola', 'anibal', 'calvin', 'trace', 'kristen', 'sangita', 'ai', 'karthik', 'refugio', 'janina', 'nelia', 'edie', 'michaela', 'chong', 'shalini', 'simeon', 'vikram', 'lynnette', 'dai', 'swati', 'zdzislaw', 'sharilyn', 'damon', 'deepa', 'christiana', 'jami', 'leora', 'gayle', 'charmaine', 'jessie', 'kulwinder', 'caryl', 'erick', 'rico', 'flor', 'stan', 'ofelia', 'lorilee', 'cherryl', 'darrin', 'graeme', 'teofilo', 'lorelei', 'alla', 'amanda', 'juliane', 'guido', 'landon', 'channing', 'lauri', 'sharla', 'joy', 'harrison', 'elaina', 'shahin', 'jovita', 'samantha', 'alok', 'giuseppina', 'aron', 'iqbal', 'jayson', 'dewey', 'pieter', 'stewart', 'jared', 'kandy', 'robin', 'angelo', 'junior', 'billie', 'rainer', 'meri', 'louie', 'margit', 'serena', 'cale', 'german', 'sal', 'kasey', 'percy', 'kathryn', 'sharee', 'zhong', 'alicja', 'phong', 'eulalia', 'sueann', 'kamran', 'carlos', 'willa', 'deanne', 'sok', 'dallas', 'victor', 'claire', 'pauline', 'delfina', 'dolores', 'eliot', 'fang', 'imad', 'xiaoping', 'tonja', 'kati', 'anwar', 'brock', 'liza', 'rubina', 'devon', 'ellis', 'nicole', 'arun', 'antoine', 'sheryle', 'tinh', 'leena', 'clark', 'alistair', 'alejandro', 'jacquelin', 'latoya', 'della', 'lezlie', 'bonifacio', 'myung', 'keven', 'piyush', 'susan', 'tama', 'willie', 'elvis', 'shan', 'racheal', 'pilar', 'reyna', 'roque', 'brigitte', 'victoria', 'felecia', 'adrianne', 'tracey', 'dru', 'juergen', 'tawnya', 'emmett', 'gregorio', 'rebecka', 'rock', 'mykhaylo', 'rocky', 'joette', 'summer', 'srinivas', 'merri', 'nelly', 'beate', 'valentine', 'katy', 'alena', 'yelena', 'cora', 'toni', 'vasiliy', 'carlotta', 'ky', 'erich', 'curtiss', 'gisele', 'adrian', 'julio', 'johnathon', 'kristofer', 'aurea', 'migdalia', 'pavel', 'erin', 'alesha', 'eleonora', 'katie', 'chen', 'larysa', 'rosie', 'dipak', 'demetrio', 'elijah', 'mehmet', 'quentin', 'earline', 'brooke', 'lucas', 'bobbi', 'tam', 'friedrich', 'geri', 'cassie', 'giselle', 'krishna', 'hilary', 'kamal', 'renata', 'rachel', 'dinh', 'ben', 'heng', 'valarie', 'jamee', 'rebecca', 'gail', 'rona', 'trinidad', 'wally', 'pankaj', 'quintin', 'hieu', 'kenya', 'sterling', 'anabel', 'mae', 'brigida', 'lenore', 'suzy', 'anuradha', 'shadi', 'edgardo', 'stefania', 'kassandra', 'brodie', 'lilia', 'bud', 'julianna', 'cherry', 'stanton', 'olive', 'chee', 'margene', 'mai', 'lester', 'mandeep', 'tracy', 'athena', 'hans', 'jelena', 'kimberly', 'branden', 'darleen', 'osvaldo', 'kia', 'christian', 'le', 'nichole', 'scott', 'chirag', 'jerrold', 'kazimierz', 'orrin', 'rosalia', 'tad', 'barron', 'hui', 'elsie', 'jayne', 'kayce', 'roman', 'sayed', 'hanan', 'cherie', 'jane', 'elida', 'farhad', 'fern', 'issac', 'hoyt', 'ravi', 'myrna', 'ernesto', 'kwang', 'ljiljana', 'iris', 'sima', 'arthur', 'andrey', 'lesa', 'cheyenne', 'heike', 'lily', 'gaurav', 'hayley', 'delphine', 'mel', 'manjit', 'mina', 'juanito', 'dmitry', 'stacey', 'luciano', 'kendal', 'tuan', 'kami', 'ricki', 'mark', 'wai', 'tzvi', 'shellie', 'meera', 'efrain', 'shelly', 'dagoberto', 'pete', 'beryl', 'tanya', 'charlie', 'darius', 'lizabeth', 'chao', 'luan', 'liviu', 'cuc', 'dalton', 'alessandra', 'marcelle', 'santos', 'yu', 'russel', 'clarence', 'dimitrios', 'clayton', 'dean', 'elwin', 'brant', 'bassam', 'sherilyn', 'earnestine', 'benito', 'jacques', 'julian', 'phat', 'augusto', 'bette', 'nader', 'elbert', 'gunther', 'myriam', 'sridhar', 'casandra', 'siegfried', 'elisabeth', 'ellyn', 'mohammad', 'kimber', 'demetrios', 'matilda', 'vicky', 'kuo', 'parag', 'gustav', 'gerhard', 'bethanne', 'billy', 'phung', 'tai', 'atul', 'halina', 'marcel', 'joerg', 'riley', 'tori', 'constantino', 'letha', 'slawomir', 'weiping', 'loc', 'grady', 'rima', 'alon', 'annmarie', 'alexandre', 'rupert', 'xuan', 'nang', 'imran', 'rocco', 'myra', 'yesenia', 'lizbeth', 'earnest', 'virgil', 'donald', 'fay', 'doyle', 'kimberli', 'lidia', 'alison', 'bryant', 'erik', 'liliya', 'lorenzo', 'tory', 'carol', 'khaled', 'dalene', 'collette', 'zeljko', 'rania', 'dale', 'howard', 'corey', 'roberto', 'deon', 'sudhakar', 'lanny', 'reese', 'kevin', 'trinity', 'abhishek', 'liem', 'anil', 'candyce', 'ashraf', 'nam', 'marta', 'cody', 'zheng', 'armin', 'juliet', 'catherine', 'bob', 'gladys', 'nikolay', 'gemma', 'annalisa', 'larissa', 'abdullah', 'ramin', 'sabra', 'sammie', 'joselito', 'alisha', 'qiang', 'in', 'dewayne', 'kandis', 'ara', 'genaro', 'lance', 'kay', 'maryellen', 'darin', 'fabiola', 'april', 'candida', 'bernadette', 'asma', 'eran', 'meng', 'malia', 'arla', 'ira', 'morton', 'donn', 'lisa', 'bruno', 'elmer', 'hannelore', 'parvin', 'ayanna', 'eugenia', 'nubia', 'bao', 'lamont', 'ole', 'marin', 'vickey', 'brent', 'arvind', 'cory', 'bradly', 'debra', 'matthias', 'yolanda', 'desiree', 'harmony', 'chester', 'ethan', 'jong', 'brandt', 'lida', 'jose', 'cathie', 'fu', 'niels', 'allison', 'verna', 'prakash', 'deane', 'kimberlee', 'sadie', 'charlene', 'cezary', 'rudy', 'farid', 'adrianna', 'duane', 'shi', 'aracely', 'jianguo', 'gabriele', 'karolyn', 'judd', 'shmuel', 'sheena', 'titus', 'hernan', 'levon', 'roxie', 'man', 'vasiliki', 'kerstin', 'jess', 'aziz', 'noelia', 'gertrude', 'kao', 'lorene', 'jude', 'byron', 'indira', 'gerrie', 'yung', 'kiersten', 'justin', 'coby', 'sonja', 'desmond', 'ralph', 'jo', 'mao', 'val', 'orville', 'imelda', 'alva', 'hanh', 'nate', 'beulah', 'bozena', 'mariusz', 'heide', 'mayank', 'enedina', 'laraine', 'iliana', 'nicholaus', 'johnson', 'trudie', 'annemarie', 'naveen', 'polly', 'randy', 'valentin', 'arsen', 'nora', 'misael', 'cheryll', 'deneen', 'joshua', 'luz', 'clint', 'richard', 'jarrod', 'chase', 'ines', 'anila', 'lyndon', 'aliza', 'birgit', 'gayla', 'susann', 'marie', 'lourdes', 'richie', 'ioana', 'paige', 'hema', 'liang', 'stephan', 'yong', 'kyu', 'jaqueline', 'yulia', 'gerald', 'hussein', 'donny', 'homero', 'ryszard', 'kang', 'meena', 'srinivasan', 'karrie', 'fritz', 'epifanio', 'merrilee', 'stephani', 'guo', 'charity', 'trish', 'nikolaos', 'hiram', 'krzysztof', 'tania', 'lucyna', 'volodymyr', 'charlotte', 'nancee', 'bartholomew', 'trevor', 'ernie', 'jarett', 'giles', 'isabelle', 'andy', 'nicky', 'sivakumar', 'katelyn', 'ching', 'shahram', 'moon', 'tamatha', 'ahmed', 'praveen', 'stevie', 'eduard', 'bronwyn', 'jeanne', 'guang', 'yoon', 'carly', 'shane', 'carina', 'tonya', 'jutta', 'colm', 'kong', 'tim', 'merlin', 'josefa', 'renita', 'joon', 'rufus', 'spencer', 'chandra', 'kelleen', 'linh', 'randon', 'nicholas', 'elma', 'gillian', 'trang', 'karmen', 'aviva', 'valery', 'janeen', 'saundra', 'cheryle', 'catalina', 'richmond', 'jedidiah', 'uma', 'randal', 'tye', 'glory', 'tanja', 'fannie', 'hermelinda', 'raelene', 'terrill', 'elvia', 'bradley', 'mahmood', 'vito', 'carola', 'stephenie', 'isaias', 'estelle', 'laurie', 'tin', 'bonny', 'emma', 'nanci', 'sunday', 'clement', 'aida', 'lena', 'yoko', 'raoul', 'debbi', 'dennis', 'deidra', 'celine', 'micheline', 'winifred', 'giancarlo', 'vincenzo', 'heather', 'dawna', 'gracie', 'tracee', 'angelique', 'shelia', 'julene', 'thor', 'harish', 'ethel', 'liisa', 'ronnie', 'freddy', 'dianna', 'kimberlie', 'masoud', 'dewitt', 'raman', 'dee', 'yi', 'maxim', 'minh', 'darron', 'ali', 'jory', 'wade', 'carleen', 'tasha', 'benita', 'aleksey', 'ilana', 'azucena', 'filiberto', 'greg', 'mircea', 'gabino', 'arleen', 'loraine', 'mariela', 'anita', 'shilpa', 'ritu', 'cade', 'giuseppe', 'olin', 'bonnie', 'shayla', 'phu', 'katherin', 'tiffanie', 'luana', 'seth', 'haydee', 'dudley', 'gopal', 'kirk', 'kun', 'brynn', 'felice', 'raffaele', 'han', 'terrie', 'danna', 'lewis', 'lukas', 'xing', 'denise', 'kristan', 'benigno', 'willis', 'curt', 'chan', 'priti', 'alexei', 'bella', 'henrik', 'tadeusz', 'deanna', 'talin', 'marnie', 'lucia', 'daryl', 'evelina', 'samuel', 'deron', 'krystal', 'sam', 'tomi', 'inna', 'noemi', 'manish', 'sunny', 'elba', 'jerilyn', 'chitra', 'kostas'}

hispanic_names = {'hipolito', 'melchor', 'kenia', 'micaela', 'ernestina', 'eugenio', 'silvia', 'xiomara', 'viviana', 'lissette', 'alonso', 'adelaida', 'edgar', 'adolfo', 'amado', 'lino', 'adriana', 'cipriano', 'erasmo', 'salvador', 'lisandro', 'aldo', 'lucila', 'natividad', 'fredy', 'edmundo', 'hilario', 'ivette', 'gustavo', 'zoila', 'tomas', 'abelardo', 'gricelda', 'margarito', 'eloisa', 'fidencio', 'abel', 'irma', 'ligia', 'dionisio', 'amador', 'rodolfo', 'avelino', 'ricardo', 'alma', 'dulce', 'marcelino', 'luisa', 'angelita', 'dario', 'maximino', 'blas', 'feliciano', 'hortencia', 'rosalinda', 'gildardo', 'francisco', 'magdalena', 'milagros', 'arnoldo', 'rolando', 'leopoldo', 'ulises', 'noe', 'dania', 'sofia', 'emiliano', 'felipe', 'leonel', 'digna', 'cruz', 'humberto', 'marisol', 'elva', 'dora', 'rosario', 'cirilo', 'bernardino', 'liliana', 'xochitl', 'fanny', 'mireya', 'agustin', 'marcos', 'rogelio', 'francisca', 'jesus', 'eliseo', 'estela', 'adelina', 'lorena', 'pascual', 'rigoberto', 'caridad', 'federico', 'javier', 'everardo', 'celina', 'anibal', 'domingo', 'gonzalo', 'heriberto', 'segundo', 'refugio', 'yasmin', 'florentino', 'mariano', 'ubaldo', 'flor', 'fabian', 'obdulia', 'ofelia', 'alejandra', 'teofilo', 'josue', 'aurelio', 'altagracia', 'florencio', 'felix', 'alberto', 'aurora', 'jovita', 'rafael', 'gerardo', 'raul', 'herminio', 'enrique', 'miguel', 'claudio', 'german', 'rey', 'margarita', 'beatriz', 'eulalia', 'andres', 'herlinda', 'pedro', 'augustin', 'hugo', 'patricio', 'carlos', 'elsa', 'delfina', 'mario', 'loreto', 'ismael', 'nydia', 'alejandro', 'griselda', 'bonifacio', 'hilda', 'elvis', 'elia', 'pilar', 'reyna', 'roque', 'leandro', 'cornelio', 'magaly', 'gregorio', 'maritza', 'jacinto', 'rosalina', 'marco', 'nelly', 'marcelo', 'julio', 'migdalia', 'aurea', 'josefina', 'demetrio', 'celestino', 'rosaura', 'mauricio', 'nilda', 'octavio', 'mirna', 'rosio', 'trinidad', 'maximo', 'anabel', 'brigida', 'orlando', 'armida', 'rodrigo', 'edgardo', 'raymundo', 'esperanza', 'flavio', 'lilia', 'fernando', 'saul', 'gilberto', 'jairo', 'ezequiel', 'fidel', 'joaquin', 'ivonne', 'leonor', 'crispin', 'narciso', 'osvaldo', 'hector', 'sabino', 'daisy', 'rosalba', 'rosalia', 'nestor', 'concepcion', 'consuelo', 'elida', 'maria', 'ernesto', 'maricela', 'sergio', 'genoveva', 'amalia', 'luciano', 'santiago', 'arnaldo', 'lucio', 'efrain', 'lauro', 'yanet', 'clemente', 'dagoberto', 'cesar', 'elias', 'moises', 'juan', 'ignacio', 'santos', 'geronimo', 'faustino', 'soledad', 'wilfredo', 'benito', 'serafin', 'guadalupe', 'augusto', 'myriam', 'arcelia', 'jorge', 'reina', 'gregoria', 'candelario', 'rebeca', 'alvaro', 'alfredo', 'lorenza', 'guillermina', 'mayra', 'diego', 'constantino', 'angel', 'gaspar', 'evangelina', 'eleazar', 'reinaldo', 'blanca', 'manuel', 'yadira', 'adan', 'yesenia', 'cecilio', 'efren', 'fermin', 'lidia', 'lilian', 'damaris', 'lorenzo', 'paulino', 'antonia', 'roberto', 'esmeralda', 'mercedes', 'oralia', 'carolina', 'arsenio', 'justo', 'idalia', 'susana', 'guillermo', 'genaro', 'eliana', 'fabiola', 'candida', 'maximiliano', 'reyes', 'jaime', 'nubia', 'porfirio', 'manuela', 'omar', 'yolanda', 'evelia', 'bernardo', 'adalberto', 'baltazar', 'jose', 'ana', 'antonio', 'rosalio', 'rosendo', 'juventino', 'ciro', 'rudy', 'herminia', 'oscar', 'lazaro', 'aracely', 'armando', 'hernan', 'isela', 'estella', 'teodoro', 'noelia', 'graciela', 'berta', 'delia', 'anselmo', 'enriqueta', 'eusebio', 'leticia', 'imelda', 'xavier', 'elvira', 'enedina', 'bertha', 'iliana', 'ruben', 'abner', 'amparo', 'misael', 'karina', 'luz', 'roxana', 'ramiro', 'ines', 'candido', 'eduardo', 'lourdes', 'horacio', 'lisette', 'homero', 'camilo', 'vidal', 'epifanio', 'mauro', 'elpidio', 'raquel', 'uriel', 'rafaela', 'tito', 'juana', 'artemio', 'maribel', 'modesto', 'reynaldo', 'socorro', 'israel', 'matilde', 'leobardo', 'angelica', 'carmen', 'celso', 'marcela', 'gabriela', 'juvenal', 'josefa', 'gabriel', 'rocio', 'elda', 'elma', 'alfonso', 'catalina', 'isidro', 'lupe', 'luiz', 'hermelinda', 'elvia', 'araceli', 'pablo', 'isaias', 'rosana', 'aida', 'julissa', 'vicente', 'rosalva', 'marisela', 'bernabe', 'vilma', 'esteban', 'oswaldo', 'eloy', 'freddy', 'violeta', 'salomon', 'lizette', 'isabel', 'rony', 'leonardo', 'aura', 'azucena', 'filiberto', 'gabino', 'arturo', 'julieta', 'mariela', 'minerva', 'adela', 'rosa', 'belen', 'octaviano', 'haydee', 'alba', 'fausto', 'emilia', 'delfino', 'sonia', 'benigno', 'emilio', 'cristobal', 'felicitas', 'norberto', 'perla', 'arnulfo', 'noemi', 'elba', 'luis', 'ileana', 'ramon'} 

white_names = {'stanislav', 'pietro', 'ruby', 'chantal', 'millie', 'lauren', 'rosemarie', 'warren', 'marylynn', 'kim', 'waltraud', 'ilan', 'toby', 'thurman', 'grigoriy', 'karry', 'corbin', 'carter', 'enrico', 'chadwick', 'lara', 'sharon', 'pam', 'tomasz', 'shad', 'jacob', 'rustin', 'camilla', 'camille', 'marni', 'janie', 'torrey', 'sona', 'mihaela', 'silas', 'dann', 'harry', 'kevan', 'randolph', 'cheryl', 'karl', 'cherise', 'enid', 'adnan', 'chandler', 'karalee', 'layne', 'alysia', 'yevgeniya', 'andre', 'klaus', 'mireille', 'elizabeth', 'alyse', 'simone', 'darrick', 'moira', 'jacki', 'brady', 'bailey', 'millard', 'karey', 'sheree', 'skyler', 'mariya', 'lorrie', 'rhett', 'terry', 'suellen', 'hazel', 'omer', 'kermit', 'salina', 'edna', 'ashlee', 'lincoln', 'santa', 'stuart', 'benedict', 'gary', 'raffi', 'mabel', 'pennie', 'dante', 'caleb', 'vincent', 'wieslaw', 'gideon', 'reggie', 'amos', 'courtney', 'bernie', 'louanne', 'russ', 'annie', 'leon', 'cindee', 'anson', 'margery', 'konstantin', 'marita', 'corrine', 'sami', 'craig', 'cyril', 'les', 'juli', 'mostafa', 'mariann', 'josiah', 'dorota', 'natalya', 'beverley', 'roseann', 'caterina', 'jenni', 'abigail', 'mike', 'gaetano', 'kimberley', 'teressa', 'jaye', 'kacy', 'mason', 'ella', 'damian', 'leslie', 'georgianna', 'svetlana', 'arie', 'alan', 'everett', 'erwin', 'eyal', 'aleta', 'wayne', 'diana', 'mia', 'cathryn', 'jewel', 'leah', 'gabriella', 'rosetta', 'rafi', 'penni', 'willy', 'clarissa', 'fiona', 'ismail', 'josette', 'malinda', 'petar', 'dustin', 'marc', 'marcus', 'patty', 'winona', 'elliott', 'alta', 'catrina', 'gina', 'mieczyslaw', 'rosalie', 'ibrahim', 'liana', 'maryann', 'theo', 'meg', 'bryn', 'haley', 'karol', 'caroline', 'annette', 'bennett', 'amer', 'joann', 'kathrin', 'rickie', 'jeanmarie', 'montgomery', 'valeri', 'joseph', 'olena', 'miranda', 'venus', 'george', 'cari', 'selina', 'shaun', 'lorin', 'sydney', 'darwin', 'delbert', 'lee', 'mickie', 'jewell', 'delynn', 'miriam', 'alexa', 'brigette', 'britta', 'luciana', 'terri', 'jayme', 'iwona', 'joyce', 'georgette', 'heath', 'dusty', 'georgia', 'steven', 'dominic', 'dylan', 'kiley', 'joan', 'magda', 'jennie', 'sebastian', 'claudine', 'kerin', 'bonni', 'iryna', 'kirby', 'ari', 'ernst', 'karen', 'stepan', 'scarlett', 'stacie', 'irene', 'merideth', 'louella', 'carma', 'eleanor', 'davin', 'wynne', 'rhea', 'darby', 'kenneth', 'stavros', 'luther', 'cristine', 'haim', 'keith', 'lottie', 'cherri', 'derek', 'birgitta', 'daria', 'dillon', 'fred', 'leta', 'ronda', 'wanda', 'blaise', 'krista', 'lani', 'india', 'madelyn', 'wendell', 'jackie', 'yevgeniy', 'cristopher', 'mitra', 'lanette', 'debrah', 'madonna', 'yvonne', 'erinn', 'evangelos', 'edmond', 'joe', 'nedra', 'ty', 'johnnie', 'derik', 'chris', 'owen', 'myles', 'veronika', 'betty', 'lauralee', 'dave', 'warner', 'brennan', 'florian', 'marvin', 'sallie', 'danuta', 'jeanna', 'allene', 'davis', 'marian', 'adele', 'sanford', 'cristy', 'jefferson', 'stefan', 'brody', 'loreen', 'cordelia', 'brien', 'deidre', 'vickie', 'brianne', 'olivia', 'tammy', 'kayleen', 'admir', 'rex', 'maher', 'sandra', 'frieda', 'monika', 'trudi', 'marna', 'niki', 'maia', 'arne', 'mila', 'roxane', 'kimball', 'violet', 'wieslawa', 'laurence', 'stephen', 'lyman', 'alaina', 'liam', 'clara', 'cathy', 'starr', 'shara', 'noelle', 'alexandria', 'pat', 'domenic', 'delma', 'julius', 'kyla', 'irvin', 'kaylyn', 'tamara', 'jerrie', 'vern', 'stephane', 'mathew', 'mikki', 'kerri', 'jacek', 'susanna', 'sheilah', 'nell', 'zachery', 'alanna', 'bobby', 'charleen', 'james', 'keenan', 'leeann', 'alecia', 'mitch', 'habib', 'traci', 'lory', 'kandace', 'len', 'jeanie', 'tristan', 'forest', 'eula', 'tresa', 'fae', 'elyse', 'lita', 'yuri', 'faith', 'roxanna', 'lorne', 'geralyn', 'natasha', 'judah', 'hannah', 'kristoffer', 'yakov', 'bridgit', 'sherrill', 'tabatha', 'britton', 'nigel', 'scottie', 'horace', 'mackenzie', 'zoran', 'theron', 'carroll', 'gilda', 'annetta', 'emad', 'harald', 'trent', 'reza', 'carolyn', 'rob', 'creighton', 'jeana', 'martin', 'maureen', 'kaye', 'melinda', 'verne', 'jimmie', 'ginette', 'arlene', 'sandor', 'francesca', 'magdy', 'gisela', 'renae', 'tiffani', 'vita', 'jann', 'raphael', 'steffany', 'treva', 'helen', 'gerri', 'susie', 'ed', 'molly', 'rana', 'sharyn', 'autumn', 'deann', 'judie', 'derick', 'talia', 'maren', 'wende', 'aimee', 'benny', 'judy', 'alvin', 'colin', 'davina', 'hamid', 'duke', 'ernestine', 'jerome', 'myrtle', 'aram', 'leonora', 'meagan', 'marlin', 'farrah', 'joey', 'walter', 'anton', 'liesl', 'lea', 'gil', 'kieran', 'clifford', 'garrett', 'adam', 'jannette', 'lynne', 'emery', 'lana', 'bernice', 'daniela', 'bernadine', 'esther', 'alexis', 'all other first names', 'jeremiah', 'effie', 'fonda', 'bryce', 'marcy', 'rowena', 'gordon', 'jarod', 'jamey', 'marsha', 'ivan', 'sari', 'winston', 'audrey', 'stephany', 'melanie', 'mardi', 'gigi', 'lissa', 'kathryne', 'nathaniel', 'karon', 'millicent', 'yves', 'alf', 'harlan', 'bahram', 'roderic', 'dominick', 'michaelene', 'cristin', 'nanette', 'al', 'inez', 'tommy', 'harvey', 'addie', 'mildred', 'roderick', 'frank', 'bret', 'glen', 'pamela', 'vahan', 'lowell', 'connie', 'nataliya', 'susette', 'wendy', 'edwina', 'natalie', 'ronna', 'thad', 'nina', 'kory', 'jeromy', 'marlys', 'ericka', 'twila', 'clarke', 'tara', 'herbert', 'jason', 'karlene', 'marko', 'adrienne', 'ariana', 'lela', 'camie', 'leroy', 'fariborz', 'ritchie', 'brigid', 'mollie', 'caron', 'shawn', 'tim', 'odette', 'ray', 'conor', 'megan', 'grigor', 'beckie', 'ava', 'carlie', 'jarrett', 'lindy', 'cathleen', 'ronen', 'bertram', 'theodore', 'nicolette', 'sharron', 'sophia', 'trena', 'joanie', 'mohamed', 'trudy', 'matthew', 'youssef', 'omid', 'romy', 'shawnee', 'mehdi', 'leila', 'marcella', 'boyd', 'rosann', 'rosalee', 'tana', 'callie', 'karyn', 'royal', 'william', 'laszlo', 'amber', 'patsy', 'erika', 'carrie', 'burt', 'merrie', 'shanon', 'dmitri', 'kandice', 'hana', 'andria', 'bessie', 'dana', 'josie', 'phil', 'leif', 'carie', 'ingeborg', 'austin', 'aubrey', 'alberta', 'eddie', 'alireza', 'ola', 'marlyn', 'adriane', 'jaclyn', 'declan', 'chasity', 'lelia', 'angela', 'paola', 'karim', 'kenny', 'antoinette', 'denver', 'michel', 'ruth', 'yana', 'shana', 'filomena', 'violetta', 'alana', 'madeline', 'hossein', 'sylwia', 'nickie', 'mikel', 'priscilla', 'georgi', 'neville', 'keegan', 'lonny', 'loriann', 'maury', 'normand', 'allan', 'andrew', 'evelyn', 'garen', 'marietta', 'gaylord', 'branko', 'milena', 'mitchel', 'sky', 'pattie', 'grzegorz', 'alicia', 'danita', 'brook', 'astrid', 'eleanore', 'manfred', 'karine', 'ted', 'valeria', 'lorna', 'renate', 'shaina', 'elena', 'joellen', 'sabina', 'doris', 'carson', 'soraya', 'abbey', 'kandi', 'beverly', 'sabrina', 'anja', 'jerad', 'mindi', 'darlene', 'penny', 'ilias', 'domenick', 'jacquelynn', 'pawel', 'simona', 'weldon', 'agata', 'ida', 'mustafa', 'gay', 'johann', 'nella', 'stefano', 'yuriy', 'gudrun', 'carolynn', 'lonnie', 'jacky', 'zachary', 'sandi', 'stella', 'mac', 'joi', 'avi', 'gloria', 'noah', 'nicolae', 'kathrine', 'nunzio', 'lyle', 'rick', 'camelia', 'logan', 'jamil', 'carin', 'rodney', 'travis', 'tony', 'blake', 'leona', 'rusty', 'kristal', 'marya', 'dwaine', 'cecily', 'duncan', 'vernon', 'anna', 'tammie', 'alexia', 'candy', 'reba', 'ariel', 'lyudmila', 'gaye', 'ranae', 'alexey', 'joao', 'nichol', 'frances', 'jodie', 'rene', 'tisha', 'tanner', 'wesley', 'clarice', 'schuyler', 'shira', 'phyllis', 'wendee', 'samir', 'clinton', 'ervin', 'justine', 'mazen', 'maciej', 'gwyneth', 'kelly', 'ronny', 'lynda', 'elliot', 'sergei', 'gia', 'venessa', 'tod', 'lars', 'janine', 'dwight', 'christal', 'douglas', 'edward', 'dawne', 'lauretta', 'krysta', 'roselyn', 'nellie', 'kyra', 'douglass', 'brittney', 'ofer', 'devin', 'aneta', 'tucker', 'dori', 'wes', 'tarek', 'julieann', 'martyn', 'mihai', 'holley', 'jenny', 'stanley', 'lisbeth', 'luigi', 'pia', 'miroslaw', 'gunnar', 'moshe', 'claus', 'arlette', 'kirstin', 'clifton', 'garnet', 'joni', 'siobhan', 'reid', 'danial', 'ladonna', 'buck', 'sean', 'taryn', 'regina', 'marius', 'maurice', 'lu', 'yuliya', 'alastair', 'michelle', 'loni', 'louisa', 'prudence', 'pearl', 'jimmy', 'spiro', 'lise', 'kala', 'meridith', 'alina', 'jon', 'hubert', 'hunter', 'anneliese', 'rayna', 'martha', 'randi', 'marion', 'cleo', 'babak', 'delores', 'jadwiga', 'lucy', 'karma', 'geoff', 'brendon', 'marisa', 'carlee', 'giovanni', 'otis', 'jerre', 'milan', 'daron', 'rhoda', 'marylee', 'brenton', 'bogdan', 'bridgette', 'cris', 'kendra', 'lola', 'annabel', 'cort', 'dariusz', 'massimo', 'russell', 'andreas', 'louann', 'selena', 'staci', 'denis', 'roxanne', 'nona', 'beatrice', 'wilda', 'ward', 'bertrand', 'brett', 'hedy', 'isaac', 'janusz', 'vadim', 'christie', 'kurt', 'zack', 'donnie', 'donovan', 'peder', 'kelli', 'nita', 'frederick', 'amal', 'bartley', 'larry', 'micheal', 'rodd', 'marybeth', 'cecile', 'mansour', 'liz', 'sarina', 'panagiotis', 'gale', 'herb', 'jillian', 'tracie', 'corine', 'lia', 'steffen', 'barbara', 'veronique', 'dane', 'amelia', 'roland', 'shelby', 'cindi', 'petra', 'carmela', 'blanche', 'constantine', 'hasan', 'trey', 'ani', 'tom', 'claudia', 'glenda', 'eli', 'maxwell', 'dyan', 'constance', 'max', 'jordan', 'annamarie', 'tal', 'martine', 'neva', 'gennady', 'raisa', 'agatha', 'sophie', 'sue', 'nelson', 'deena', 'libby', 'garth', 'goran', 'burton', 'shelley', 'leland', 'major', 'launa', 'charisse', 'patrica', 'suzanna', 'michell', 'michele', 'larisa', 'regan', 'denice', 'lucille', 'cindy', 'brandon', 'laird', 'jeannine', 'fernanda', 'mariam', 'lina', 'hailey', 'renea', 'darcie', 'dorothea', 'eunice', 'dorit', 'simon', 'carmine', 'karissa', 'jeffry', 'louis', 'emmanuel', 'dorina', 'janae', 'evan', 'eden', 'lynn', 'von', 'amin', 'cordell', 'nicolle', 'greggory', 'luann', 'christos', 'patrice', 'sherwin', 'fawn', 'grazyna', 'ernest', 'laureen', 'pasquale', 'brion', 'ursula', 'geneva', 'tobias', 'marijo', 'daphne', 'dian', 'tami', 'fatima', 'nancy', 'deeann', 'chauncey', 'michael', 'allen', 'hugh', 'malcolm', 'nicki', 'valeriy', 'nan', 'carleton', 'corbett', 'rochelle', 'neal', 'glenna', 'shelli', 'twyla', 'oren', 'shiloh', 'lyubov', 'abby', 'genevieve', 'iva', 'evette', 'starla', 'jenine', 'zoe', 'gheorghe', 'luc', 'robyn', 'marci', 'elisha', 'leslee', 'jacquelyn', 'candis', 'helene', 'sylvie', 'bobbie', 'ada', 'darryl', 'freddie', 'carissa', 'rosalyn', 'harris', 'allyson', 'grover', 'ivy', 'sharen', 'isabella', 'lyndsey', 'ruthanne', 'jolanta', 'tatum', 'saeed', 'emil', 'melvyn', 'marek', 'marianna', 'arianne', 'aleksandra', 'anjanette', 'greta', 'peyton', 'alain', 'sharyl', 'issa', 'archie', 'marino', 'tamera', 'wilson', 'ian', 'neil', 'carlyn', 'armen', 'ezra', 'ford', 'jaimie', 'christen', 'anastasia', 'corie', 'judson', 'gaylene', 'alfred', 'celia', 'marjory', 'regena', 'margo', 'melodie', 'arlyn', 'kellee', 'tricia', 'malik', 'cole', 'aric', 'gordana', 'reynold', 'edwin', 'elio', 'meggan', 'rhonda', 'cecelia', 'maura', 'paulette', 'lyn', 'lonna', 'tyler', 'patrick', 'farah', 'christianne', 'bert', 'chanda', 'deirdre', 'rudolf', 'skye', 'clare', 'kary', 'eva', 'terrence', 'marilyn', 'mahmoud', 'mary', 'boguslaw', 'santo', 'kelsey', 'geoffrey', 'sawsan', 'august', 'waldemar', 'barry', 'jody', 'anthony', 'lona', 'stefanie', 'bettina', 'olivier', 'karli', 'lois', 'frederic', 'anders', 'clay', 'myron', 'nick', 'donna', 'hollis', 'niles', 'randall', 'deborah', 'taylor', 'jeff', 'tawny', 'axel', 'levi', 'signe', 'antje', 'cristen', 'celeste', 'christy', 'tamra', 'sasha', 'paulina', 'kenton', 'dolly', 'rena', 'tiffany', 'glynn', 'frankie', 'marcia', 'gretchen', 'mordechai', 'katina', 'mikael', 'salvatore', 'carla', 'christel', 'roxann', 'valorie', 'guy', 'terrell', 'dorcas', 'colt', 'tonia', 'adria', 'florin', 'lianne', 'coleman', 'artur', 'holly', 'shay', 'silvana', 'anca', 'alia', 'kristin', 'parviz', 'irina', 'teena', 'mehrdad', 'cristie', 'dannette', 'carrol', 'brooks', 'leonard', 'damien', 'helga', 'stanislawa', 'maryam', 'debby', 'gilbert', 'bryan', 'jonathon', 'gregory', 'eldon', 'monroe', 'cristian', 'theresa', 'christiane', 'gabrielle', 'tatiana', 'nathan', 'thierry', 'nada', 'urszula', 'mervin', 'lael', 'laurin', 'wilburn', 'ilya', 'jodee', 'lou', 'rodrick', 'donato', 'eleni', 'laila', 'bill', 'louise', 'robbin', 'vahe', 'eric', 'lorinda', 'harold', 'meryl', 'daniele', 'leszek', 'lior', 'serge', 'alden', 'loyd', 'jerzy', 'jonah', 'carmel', 'erica', 'marlene', 'glenn', 'alexandra', 'kraig', 'fran', 'shannon', 'ami', 'danette', 'kendrick', 'conrad', 'kaitlin', 'marilou', 'bambi', 'kristyn', 'nathanael', 'jerod', 'lawrence', 'chuck', 'zoltan', 'dimitri', 'cornelia', 'lloyd', 'franklin', 'daniella', 'terrance', 'virginia', 'alane', 'bruce', 'francois', 'jackson', 'jerry', 'darrell', 'ilene', 'hani', 'evans', 'julien', 'mathieu', 'deana', 'noel', 'tori', 'dayna', 'rich', 'alice', 'bernhard', 'walt', 'susannah', 'dick', 'horst', 'deric', 'jeanette', 'nadezhda', 'suzie', 'ora', 'ute', 'roseanna', 'juanita', 'udo', 'jules', 'elton', 'hillary', 'francine', 'lavern', 'rosalind', 'trisha', 'darrel', 'jacalyn', 'dalia', 'brandie', 'lucian', 'wyatt', 'sonya', 'roseanne', 'shari', 'augustus', 'zach', 'joaquim', 'eloise', 'elaine', 'andrei', 'abbas', 'krystyna', 'gregg', 'geraldine', 'valentina', 'silvio', 'mandi', 'patti', 'hamilton', 'kathy', 'karan', 'rosemary', 'naomi', 'ronit', 'skylar', 'alisa', 'terence', 'heidi', 'willard', 'mari', 'monty', 'christin', 'alessandro', 'rhiannon', 'armand', 'mica', 'dmitriy', 'jada', 'delilah', 'carlo', 'giovanna', 'john', 'arkady', 'dara', 'alissa', 'norman', 'vonda', 'barton', 'crystal', 'luca', 'evonne', 'jenna', 'fabio', 'aleksandr', 'cleve', 'ricky', 'brannon', 'chantelle', 'caesar', 'kip', 'thomas', 'coral', 'stefani', 'basil', 'paul', 'antonette', 'lenard', 'charla', 'arden', 'konstantinos', 'joanne', 'bridgett', 'grant', 'lillian', 'zhanna', 'zane', 'alec', 'marina', 'courtenay', 'jack', 'donita', 'anatoly', 'colette', 'hendrik', 'kale', 'jill', 'arkadiusz', 'dawn', 'lacey', 'gus', 'brianna', 'kris', 'katrin', 'freda', 'vivian', 'kathlyn', 'caren', 'graig', 'cristi', 'garry', 'ashley', 'ashton', 'velma', 'carole', 'jay', 'burke', 'marti', 'benton', 'paula', 'todd', 'brita', 'jasper', 'mihail', 'mirela', 'anatoliy', 'cecil', 'werner', 'krystle', 'sylvain', 'kerrie', 'elyssa', 'afshin', 'andrea', 'georgene', 'henri', 'breanna', 'charissa', 'josephine', 'avis', 'jacqueline', 'katarzyna', 'nadine', 'cecilia', 'rosanna', 'alycia', 'jim', 'caitlin', 'alexander', 'nikolai', 'marilee', 'brice', 'josef', 'paulo', 'lukasz', 'lila', 'bijan', 'colton', 'titus', 'vida', 'hope', 'elwood', 'stacy', 'kinga', 'royce', 'melissa', 'mona', 'harriet', 'hakop', 'renee', 'lane', 'beau', 'micahel', 'wilmer', 'dan', 'keli', 'shawna', 'misti', 'mohsen', 'suzann', 'shirley', 'sondra', 'erma', 'fredric', 'mara', 'maryjane', 'hasmik', 'colby', 'delaine', 'maksim', 'margie', 'grace', 'norris', 'wilbur', 'barrie', 'loren', 'robby', 'thelma', 'arash', 'bethany', 'carlin', 'ekaterina', 'jeannie', 'jerold', 'bradd', 'milos', 'quinn', 'leesa', 'cheri', 'marcie', 'wendie', 'wilhelmina', 'nila', 'roma', 'soren', 'robbie', 'bonita', 'keri', 'rebekah', 'ludmila', 'tibor', 'mickey', 'brian', 'nannette', 'wolfgang', 'mehran', 'sheila', 'jonelle', 'kara', 'moses', 'dwayne', 'trista', 'cosmo', 'mariana', 'sherry', 'cami', 'leanne', 'nasser', 'perry', 'jessica', 'dominique', 'juliann', 'kathi', 'linette', 'crista', 'scot', 'eve', 'kurtis', 'chelsea', 'leilani', 'pamala', 'elise', 'hank', 'annabelle', 'olga', 'shannan', 'norm', 'denny', 'taunya', 'ioannis', 'homer', 'jesse', 'kristina', 'parker', 'matt', 'anne', 'jere', 'ellie', 'kendall', 'therese', 'gaylen', 'danny', 'majid', 'margaret', 'risa', 'kristopher', 'sherril', 'art', 'chastity', 'hollie', 'khalil', 'kymberly', 'teddy', 'lavon', 'sander', 'ann', 'germaine', 'etta', 'dorinda', 'katerina', 'janene', 'mavis', 'benjamin', 'jean', 'virgina', 'katheryn', 'tabitha', 'hanna', 'chet', 'babette', 'garrick', 'jasmine', 'jarred', 'lucinda', 'ned', 'christine', 'hayden', 'marilynn', 'aleksandar', 'angelika', 'asa', 'kirsten', 'gwyn', 'newton', 'maggie', 'angeline', 'georgiana', 'will', 'jolyn', 'corrie', 'sunshine', 'quinton', 'rachele', 'zbigniew', 'flavia', 'jamison', 'timothy', 'vera', 'emile', 'gino', 'shea', 'sheridan', 'brittany', 'claude', 'nabil', 'murray', 'ralf', 'delmar', 'marzena', 'merrill', 'stevan', 'leisa', 'elisa', 'ilona', 'katherine', 'larue', 'jasmin', 'shauna', 'debi', 'rachelle', 'amy', 'yaron', 'suzanne', 'leighton', 'alida', 'jennifer', 'kari', 'emanuel', 'amina', 'shirlee', 'alexandr', 'shae', 'gwen', 'suzan', 'earl', 'hassan', 'markus', 'bettie', 'tyra', 'stephanie', 'leonid', 'teodora', 'meghan', 'sherwood', 'arnold', 'bennie', 'steffanie', 'lindsey', 'salim', 'grayson', 'aline', 'graham', 'chelsey', 'graydon', 'buford', 'vincenza', 'kristian', 'francesco', 'mimi', 'henryk', 'roberta', 'jozef', 'alesia', 'arno', 'blair', 'mohamad', 'janice', 'shelagh', 'ramona', 'monte', 'boris', 'dixie', 'tedd', 'lyndsay', 'dieter', 'julee', 'aileen', 'brienne', 'brad', 'noreen', 'darcy', 'fletcher', 'abram', 'nettie', 'marissa', 'jeffery', 'josh', 'sergey', 'marcello', 'milton', 'roscoe', 'walid', 'ruthie', 'kristine', 'derrick', 'rafal', 'felicia', 'vladislav', 'dino', 'lionel', 'dax', 'melvin', 'philip', 'kaitlyn', 'flora', 'gavin', 'mindy', 'kalen', 'gerard', 'mikhail', 'ahmet', 'catharine', 'christopher', 'darren', 'fredrick', 'cara', 'belinda', 'carmelo', 'tera', 'jerri', 'emerson', 'elden', 'luke', 'vince', 'cyrus', 'dirk', 'johnpaul', 'mallory', 'vicki', 'windy', 'kellie', 'cassidy', 'retha', 'sharlene', 'malissa', 'antonino', 'brenda', 'andriy', 'adel', 'sven', 'charles', 'michal', 'woodrow', 'kacie', 'janel', 'bohdan', 'nadia', 'colleen', 'alexandru', 'roger', 'jolene', 'glennon', 'concetta', 'dell', 'nicoletta', 'chantel', 'jacklyn', 'gennaro', 'selma', 'henrietta', 'stacia', 'breanne', 'jani', 'kirt', 'sylvia', 'jenifer', 'zachariah', 'adolph', 'reva', 'ashlie', 'natalia', 'tyson', 'domenico', 'kelley', 'tobin', 'barney', 'tate', 'sybil', 'allyn', 'ronald', 'edison', 'samira', 'holli', 'dinah', 'randell', 'houston', 'vladimir', 'johnny', 'reed', 'katharine', 'kira', 'mellisa', 'rose', 'vikki', 'jeffrey', 'bjorn', 'oliver', 'joleen', 'petr', 'scotty', 'zofia', 'gilles', 'chloe', 'judith', 'joelle', 'ila', 'dona', 'vanessa', 'galen', 'norma', 'meghann', 'ken', 'julianne', 'kristy', 'christi', 'cyndi', 'valerie', 'randee', 'marylou', 'yefim', 'joetta', 'juliana', 'earle', 'antonella', 'adelaide', 'margot', 'sammy', 'veronica', 'gerd', 'piotr', 'elin', 'laurent', 'lucie', 'patience', 'leanna', 'viktor', 'mira', 'judi', 'nils', 'karie', 'zahra', 'doreen', 'britt', 'alex', 'carolann', 'irving', 'doug', 'janis', 'franz', 'tadd', 'antonietta', 'jacque', 'ulrike', 'dion', 'jenelle', 'helena', 'karleen', 'henry', 'karla', 'debbie', 'christoph', 'marleen', 'teryl', 'liane', 'madeleine', 'jaimee', 'kenna', 'garret', 'sheryl', 'ginger', 'gareth', 'dannie', 'buffy', 'jade', 'wilfred', 'chrystal', 'ina', 'annamaria', 'carlton', 'cary', 'herman', 'kenyon', 'christina', 'leo', 'nicolas', 'becky', 'wilford', 'forrest', 'gwendolyn', 'linda', 'mariah', 'samer', 'karin', 'tamela', 'lesli', 'preston', 'danelle', 'ghassan', 'sidney', 'tressa', 'loretta', 'roswitha', 'drake', 'elzbieta', 'dorothy', 'lorri', 'nikolas', 'rudolph', 'letitia', 'jasen', 'johna', 'kathe', 'earlene', 'sherman', 'trina', 'darek', 'harriett', 'debora', 'jenell', 'johannes', 'kyle', 'alyssa', 'daren', 'irena', 'bahman', 'blythe', 'linwood', 'vitaliy', 'kacey', 'britney', 'ivana', 'carley', 'elissa', 'opal', 'vasile', 'ewa', 'betsy', 'rodger', 'coy', 'bernard', 'sherrie', 'trenton', 'rolf', 'jocelyn', 'carlene', 'bart', 'kristie', 'randel', 'tommie', 'edmund', 'christophe', 'micah', 'darla', 'angelina', 'rickey', 'jerrod', 'witold', 'niall', 'tetyana', 'monica', 'dionne', 'franco', 'shayne', 'lon', 'keely', 'sabine', 'maryanne', 'georg', 'alton', 'lamar', 'david', 'sara', 'stanislaw', 'dorene', 'jamie', 'jena', 'herve', 'mitzi', 'cinda', 'drew', 'denton', 'caryn', 'merritt', 'casey', 'marty', 'janet', 'kent', 'hany', 'tamar', 'anissa', 'johnna', 'phillip', 'sherie', 'emilie', 'audra', 'jens', 'ruthann', 'darian', 'lesley', 'cherrie', 'rosanne', 'bree', 'cameron', 'janette', 'despina', 'oleg', 'briana', 'galina', 'giulio', 'kerry', 'rami', 'marshall', 'kathie', 'maya', 'jeri', 'antony', 'maxine', 'alix', 'don', 'danica', 'lacy', 'marcin', 'inga', 'melody', 'rikki', 'aleksander', 'angelia', 'monique', 'roni', 'vivien', 'kylie', 'barbra', 'adeline', 'ester', 'arline', 'rolland', 'shon', 'sherri', 'lilly', 'lenora', 'edyta', 'franklyn', 'maribeth', 'maynard', 'kori', 'curtis', 'tatyana', 'kathleen', 'rod', 'andra', 'cornelius', 'eddy', 'alyson', 'kambiz', 'oksana', 'clive', 'candice', 'eleftherios', 'abe', 'mandy', 'sloane', 'raymond', 'nelda', 'vasilios', 'nikola', 'janey', 'eryn', 'heinz', 'amie', 'juliette', 'jefferey', 'baxter', 'robb', 'penelope', 'daniel', 'emilee', 'thea', 'blaine', 'kayla', 'joani', 'garrison', 'avery', 'ellen', 'truman', 'lynette', 'candace', 'arvin', 'ashleigh', 'ingrid', 'agnes', 'augustine', 'athanasios', 'dwain', 'suzette', 'brandi', 'vyacheslav', 'jeanine', 'peggy', 'joel', 'vaughn', 'carri', 'rand', 'bettye', 'pierre', 'rina', 'jodi', 'jeb', 'marlo', 'joline', 'florence', 'cristina', 'janell', 'jace', 'leann', 'phoebe', 'katarina', 'viola', 'lorie', 'johnie', 'shlomo', 'said', 'nancie', 'peter', 'peggie', 'cathi', 'brenna', 'alen', 'elvin', 'wojciech', 'ihor', 'lucien', 'bethann', 'jamal', 'katrina', 'dayle', 'leigh', 'per', 'johnathan', 'ryann', 'bridget', 'rollin', 'terese', 'troy', 'eugene', 'vahik', 'sherryl', 'sheri', 'ross', 'brandy', 'weston', 'kaylee', 'christa', 'sierra', 'edith', 'roy', 'emory', 'fadi', 'maha', 'nevin', 'otto', 'raleigh', 'slavica', 'seymour', 'inge', 'irwin', 'theodora', 'pascal', 'corina', 'constantin', 'ron', 'danielle', 'dina', 'arlie', 'angus', 'abraham', 'tena', 'carolee', 'beata', 'casimir', 'slobodan', 'marika', 'shelton', 'paris', 'beth', 'marguerite', 'morgan', 'marianne', 'nathalie', 'rory', 'harley', 'page', 'jan', 'kelle', 'rita', 'julia', 'abbie', 'gene', 'jennine', 'laurene', 'linsey', 'teri', 'imogene', 'shanna', 'nikolaus', 'siamak', 'piper', 'morris', 'angie', 'mack', 'walker', 'elke', 'tari', 'clyde', 'bryson', 'korey', 'shanda', 'whitney', 'jacy', 'melonie', 'gena', 'ahmad', 'francis', 'murat', 'shayna', 'gerry', 'carey', 'dani', 'misty', 'zenon', 'keren', 'livia', 'teresa', 'andrzej', 'alphonse', 'ginny', 'laura', 'aaron', 'saverio', 'hallie', 'melisa', 'randa', 'corinna', 'lydia', 'georgina', 'merry', 'pamella', 'sommer', 'tessa', 'lindsay', 'arlen', 'joycelyn', 'jonathan', 'jana', 'luanne', 'miles', 'damion', 'jolynn', 'eliza', 'portia', 'jed', 'jaroslaw', 'vasyl', 'dorian', 'paolo', 'stanford', 'tammi', 'melva', 'dianne', 'joanna', 'rosella', 'savannah', 'snezana', 'mitchell', 'carl', 'wendi', 'diane', 'jodell', 'sarkis', 'justina', 'meaghan', 'bianca', 'elinor', 'cortney', 'amir', 'elana', 'susanne', 'hisham', 'alene', 'rachael', 'wallace', 'buddy', 'carmella', 'robert', 'melba', 'kitty', 'deloris', 'muriel', 'aurelia', 'lesly', 'seamus', 'terra', 'jonna', 'timmy', 'jolie', 'dena', 'corinne', 'june', 'nickolas', 'karri', 'sarah', 'wiley', 'sandy', 'sergiy', 'tomislav', 'lenny', 'seyed', 'tosha', 'milo', 'tia', 'eileen', 'agnieszka', 'cori', 'johan', 'johanna', 'julie', 'jeremy', 'delana', 'doron', 'ryan', 'nikki', 'sigrid', 'steve', 'chad', 'vance', 'merle', 'evangeline', 'rae', 'tina', 'shonda', 'sheldon', 'patricia', 'nicola', 'ruslan', 'ardis', 'cynthia', 'lucretia', 'helmut', 'igor', 'diann', 'emily', 'iain', 'janelle', 'reagan', 'lavonne', 'wilma', 'hal', 'lora', 'reuben', 'collin', 'dov', 'del', 'faye', 'roslyn', 'lex', 'brendan', 'garland', 'clair', 'charley', 'jake', 'zina', 'norine', 'sally', 'barrett', 'bradford', 'lori', 'yvette', 'chance', 'thaddeus', 'cliff', 'malgorzata', 'joslyn', 'rian', 'tamie', 'richelle', 'liv', 'jerald', 'alyce', 'ioan', 'adina', 'laverne', 'martina', 'philippe', 'kristi', 'loree', 'darci', 'dragan', 'uwe', 'antonina', 'braden', 'cassandra', 'janna', 'vitaly', 'corrin', 'dedra', 'lorraine', 'albert', 'elie', 'jeannette', 'melina', 'floyd', 'marlena', 'darko', 'laurel', 'coleen', 'marjorie', 'bryon', 'benedetto', 'claudette', 'konrad', 'linnea', 'marla', 'meredith', 'michale', 'nikole', 'kate', 'donal', 'nolan', 'norbert', 'jonas', 'candi', 'nola', 'calvin', 'trace', 'kristen', 'janina', 'edie', 'michaela', 'simeon', 'zdzislaw', 'lynnette', 'sharilyn', 'damon', 'christiana', 'jami', 'leora', 'gayle', 'charmaine', 'jessie', 'caryl', 'erick', 'rico', 'stan', 'lorilee', 'cherryl', 'darrin', 'graeme', 'lorelei', 'alla', 'amanda', 'juliane', 'guido', 'landon', 'channing', 'lauri', 'sharla', 'joy', 'harrison', 'elaina', 'shahin', 'samantha', 'giuseppina', 'jayson', 'aron', 'dewey', 'pieter', 'stewart', 'jared', 'kandy', 'robin', 'angelo', 'junior', 'billie', 'rainer', 'meri', 'louie', 'margit', 'serena', 'cale', 'sal', 'kasey', 'sharee', 'kathryn', 'alicja', 'sueann', 'kamran', 'willa', 'deanne', 'dallas', 'claire', 'pauline', 'dolores', 'eliot', 'imad', 'tonja', 'kati', 'brock', 'liza', 'devon', 'ellis', 'nicole', 'antoine', 'sheryle', 'clark', 'alistair', 'jacquelin', 'della', 'lezlie', 'keven', 'susan', 'tama', 'racheal', 'brigitte', 'victoria', 'adrianne', 'tracey', 'dru', 'juergen', 'tawnya', 'emmett', 'rebecka', 'rock', 'rocky', 'mykhaylo', 'summer', 'joette', 'merri', 'beate', 'valentine', 'katy', 'alena', 'yelena', 'cora', 'toni', 'vasiliy', 'carlotta', 'erich', 'curtiss', 'gisele', 'adrian', 'kristofer', 'johnathon', 'pavel', 'erin', 'alesha', 'eleonora', 'katie', 'larysa', 'rosie', 'elijah', 'mehmet', 'quentin', 'earline', 'brooke', 'lucas', 'bobbi', 'friedrich', 'geri', 'cassie', 'giselle', 'hilary', 'renata', 'rachel', 'ben', 'valarie', 'jamee', 'rebecca', 'gail', 'rona', 'wally', 'quintin', 'sterling', 'mae', 'lenore', 'suzy', 'shadi', 'stefania', 'kassandra', 'brodie', 'bud', 'julianna', 'cherry', 'stanton', 'olive', 'margene', 'lester', 'tracy', 'athena', 'hans', 'jelena', 'kimberly', 'branden', 'darleen', 'nichole', 'christian', 'scott', 'jerrold', 'kazimierz', 'orrin', 'tad', 'barron', 'jayne', 'elsie', 'kayce', 'roman', 'hanan', 'cherie', 'jane', 'farhad', 'fern', 'issac', 'hoyt', 'myrna', 'ljiljana', 'iris', 'sima', 'arthur', 'andrey', 'lesa', 'cheyenne', 'heike', 'mina', 'stacey', 'hayley', 'delphine', 'mel', 'viki', 'dmitry', 'kendal', 'kami', 'ricki', 'mark', 'tzvi', 'shellie', 'shelly', 'pete', 'beryl', 'tanya', 'charlie', 'darius', 'lizabeth', 'liviu', 'dalton', 'alessandra', 'marcelle', 'russel', 'clarence', 'dimitrios', 'clayton', 'dean', 'elwin', 'brant', 'bassam', 'sherilyn', 'jacques', 'julian', 'bette', 'nader', 'elbert', 'gunther', 'casandra', 'siegfried', 'elisabeth', 'ellyn', 'kimber', 'demetrios', 'matilda', 'vicky', 'gustav', 'gerhard', 'bethanne', 'billy', 'halina', 'marcel', 'joerg', 'riley', 'letha', 'slawomir', 'grady', 'rima', 'alon', 'annmarie', 'alexandre', 'rupert', 'rocco', 'myra', 'lizbeth', 'earnest', 'virgil', 'donald', 'fay', 'doyle', 'kimberli', 'alison', 'bryant', 'erik', 'liliya', 'tory', 'carol', 'khaled', 'dalene', 'collette', 'zeljko', 'rania', 'dale', 'howard', 'corey', 'deon', 'lanny', 'reese', 'kevin', 'trinity', 'candyce', 'ashraf', 'marta', 'cody', 'armin', 'juliet', 'catherine', 'bob', 'gladys', 'nikolay', 'gemma', 'annalisa', 'larissa', 'abdullah', 'ramin', 'sabra', 'alisha', 'dewayne', 'kandis', 'ara', 'lance', 'kay', 'maryellen', 'darin', 'april', 'bernadette', 'eran', 'malia', 'arla', 'ira', 'morton', 'donn', 'lisa', 'bruno', 'elmer', 'hannelore', 'parvin', 'eugenia', 'lamont', 'ole', 'marin', 'vickey', 'brent', 'cory', 'bradly', 'debra', 'matthias', 'desiree', 'harmony', 'chester', 'ethan', 'brandt', 'lida', 'cathie', 'niels', 'allison', 'verna', 'deane', 'kimberlee', 'sadie', 'charlene', 'cezary', 'farid', 'adrianna', 'duane', 'gabriele', 'karolyn', 'judd', 'shmuel', 'sheena', 'levon', 'roxie', 'vasiliki', 'kerstin', 'jess', 'aziz', 'gertrude', 'lorene', 'jude', 'byron', 'gerrie', 'kiersten', 'justin', 'coby', 'sonja', 'desmond', 'ralph', 'jo', 'val', 'orville', 'victor', 'alva', 'nate', 'beulah', 'bozena', 'mariusz', 'heide', 'nicholaus', 'laraine', 'trudie', 'annemarie', 'polly', 'randy', 'valentin', 'arsen', 'nora', 'cheryll', 'deneen', 'joshua', 'clint', 'richard', 'jarrod', 'chase', 'lyndon', 'aliza', 'birgit', 'gayla', 'susann', 'marie', 'richie', 'ioana', 'paige', 'stephan', 'yulia', 'jaqueline', 'gerald', 'hussein', 'donny', 'ryszard', 'karrie', 'fritz', 'merrilee', 'stephani', 'charity', 'trish', 'nikolaos', 'hiram', 'krzysztof', 'tania', 'lucyna', 'volodymyr', 'charlotte', 'nancee', 'bartholomew', 'trevor', 'ernie', 'jarett', 'giles', 'isabelle', 'andy', 'nicky', 'katelyn', 'shahram', 'tamatha', 'ahmed', 'stevie', 'eduard', 'bronwyn', 'jeanne', 'carly', 'shane', 'carina', 'tonya', 'jutta', 'colm', 'merlin', 'renita', 'rufus', 'spencer', 'chandra', 'kelleen', 'randon', 'nicholas', 'gillian', 'karmen', 'aviva', 'valery', 'janeen', 'saundra', 'cheryle', 'richmond', 'jedidiah', 'randal', 'tye', 'glory', 'tanja', 'raelene', 'terrill', 'bradley', 'mahmood', 'vito', 'carola', 'stephenie', 'laurie', 'estelle', 'bonny', 'emma', 'nanci', 'sunday', 'clement', 'lena', 'raoul', 'debbi', 'dennis', 'deidra', 'celine', 'micheline', 'winifred', 'giancarlo', 'vincenzo', 'heather', 'dawna', 'gracie', 'tracee', 'angelique', 'shelia', 'julene', 'thor', 'liisa', 'ethel', 'ronnie', 'dianna', 'kimberlie', 'masoud', 'dewitt', 'dee', 'maxim', 'darron', 'ali', 'jory', 'wade', 'carleen', 'tasha', 'benita', 'aleksey', 'ilana', 'greg', 'mircea', 'arleen', 'loraine', 'anita', 'cade', 'giuseppe', 'olin', 'bonnie', 'shayla', 'katherin', 'tiffanie', 'luana', 'seth', 'dudley', 'kirk', 'raffaele', 'brynn', 'felice', 'terrie', 'danna', 'lewis', 'lukas', 'denise', 'kristan', 'willis', 'curt', 'alexei', 'bella', 'henrik', 'tadeusz', 'deanna', 'talin', 'marnie', 'lucia', 'daryl', 'evelina', 'samuel', 'deron', 'krystal', 'sam', 'tomi', 'inna', 'sunny', 'jerilyn', 'kostas'} 

black_names = {'lula', 'ayanna', 'jamila', 'wilbert', 'essie', 'ulysses', 'demetria', 'earnestine', 'fannie', 'kenya', 'tanisha', 'cedric', 'latanya', 'marlon', 'althea', 'isaiah', 'lillie', 'mable', 'tamika', 'kelvin', 'latasha', 'demetrius', 'hattie', 'latonya', 'lakisha', 'latrice', 'mattie', 'napoleon', 'solomon', 'errol', 'marva', 'jacinta', 'rohan', 'latoya', 'odell', 'darnell', 'ollie', 'latisha', 'tomeka', 'cleveland', 'anderson', 'tyrone', 'sammie', 'willie', 'jermaine', 'alfreda', 'tameka', 'octavia', 'dexter', 'odessa', 'donnell', 'reginald', 'jarvis', 'ivory', 'felecia', 'kia', 'percy', 'roosevelt', 'sylvester', 'ebony', 'mamie', 'aisha', 'cornell', 'minnie', 'alphonso', 'lawanda', 'keisha', 'quincy', 'alonzo', 'prince'} 

api_names = {'bing', 'bhavna', 'manisha', 'paresh', 'trinh', 'seok', 'virgilio', 'nguyen', 'sandeep', 'harpreet', 'nalini', 'nai', 'ravindra', 'sai', 'subhash', 'pravin', 'mohammed', 'farida', 'sonal', 'thinh', 'qing', 'ho', 'nhu', 'dieu', 'kiran', 'rashid', 'chuong', 'bharat', 'peng', 'nghia', 'sriram', 'tae', 'vinay', 'vikas', 'xiao', 'sun', 'santosh', 'ba', 'koji', 'zhuo', 'lihua', 'amarjit', 'sanjeev', 'yao', 'suong', 'guan', 'chuan', 'murali', 'asif', 'navin', 'kee', 'truc', 'bipin', 'xiu', 'pui', 'satish', 'kalpana', 'quyen', 'mahendra', 'can', 'feng', 'xuejun', 'hyo', 'shao', 'do', 'hitesh', 'yogesh', 'khang', 'vien', 'ketan', 'joo', 'byung', 'hiep', 'duy', 'neena', 'my', 'priya', 'zenaida', 'ying', 'nadeem', 'smita', 'pradeep', 'giao', 'hina', 'dat', 'hai', 'hing', 'kwok', 'dzung', 'raju', 'rui', 'wei', 'sameer', 'lin', 'ram', 'kavita', 'yoshiko', 'shin', 'winnie', 'qian', 'abdul', 'vandana', 'phuc', 'manpreet', 'sanjiv', 'huong', 'viet', 'ly', 'hue', 'sukhwinder', 'vijaya', 'renu', 'romeo', 'dong', 'sushil', 'suman', 'zhiqiang', 'mehul', 'ajit', 'kam', 'manoj', 'see', 'nisha', 'neha', 'ning', 'liming', 'chi', 'vishal', 'aparna', 'ranjit', 'cuong', 'hien', 'mei', 'kamaljit', 'hoa', 'cheuk', 'kumar', 'sharad', 'dao', 'samson', 'song', 'nikhil', 'young', 'naresh', 'veena', 'geetha', 'jee', 'suresh', 'geeta', 'rajiv', 'huey', 'phuoc', 'lai', 'anju', 'rajeev', 'sonny', 'seung', 'vinod', 'prem', 'savita', 'inderjit', 'trung', 'aruna', 'rajan', 'giang', 'thang', 'bibi', 'remedios', 'weidong', 'wan', 'ge', 'hoan', 'sangita', 'ai', 'karthik', 'anjana', 'nelia', 'surinder', 'bong', 'sandhya', 'chong', 'shalini', 'tuyet', 'swati', 'dai', 'vikram', 'milind', 'mercy', 'phan', 'dang', 'deepa', 'su', 'kulwinder', 'manjula', 'yiu', 'kwong', 'de', 'lakshmi', 'thuan', 'tho', 'chien', 'jae', 'varsha', 'chinh', 'bina', 'mi', 'alok', 'chia', 'loan', 'iqbal', 'shahid', 'chih', 'sangeeta', 'shuang', 'khoa', 'chetan', 'tran', 'hsiu', 'romulo', 'chun', 'lian', 'manu', 'yan', 'zhong', 'lolita', 'phong', 'venkat', 'xia', 'rashmi', 'muhammad', 'chung', 'sok', 'ut', 'harjinder', 'ferdinand', 'fang', 'xiaoping', 'hyung', 'archana', 'tan', 'kyung', 'anwar', 'xian', 'akiko', 'himanshu', 'rubina', 'arun', 'tinh', 'leena', 'kaushik', 'arnel', 'thao', 'myung', 'piyush', 'sau', 'quang', 'vidya', 'shan', 'alka', 'nenita', 'hye', 'van', 'jai', 'narendra', 'da', 'sohail', 'harinder', 'abhijit', 'tong', 'renato', 'raja', 'srinivas', 'miao', 'nhan', 'jun', 'jin', 'mu', 'yuan', 'ngoc', 'ky', 'prasad', 'vu', 'asha', 'li', 'faisal', 'wang', 'chen', 'dipak', 'kyaw', 'nga', 'mamta', 'nirmal', 'huan', 'loi', 'tam', 'woon', 'jian', 'manh', 'krishna', 'won', 'kamal', 'kulwant', 'amar', 'dinh', 'heng', 'san', 'conrado', 'ma', 'tak', 'srikanth', 'oanh', 'ramesh', 'roshan', 'quan', 'seong', 'hwa', 'rommel', 'chin', 'kou', 'tram', 'weiming', 'fe', 'wen', 'satya', 'jayesh', 'pankaj', 'lilibeth', 'hieu', 'thi', 'ashok', 'rong', 'anuradha', 'cheng', 'xiaodong', 'raj', 'mohan', 'xin', 'hari', 'ok', 'keiko', 'corazon', 'lili', 'quynh', 'anjali', 'hong', 'chee', 'mai', 'rahul', 'mandeep', 'hang', 'hua', 'tri', 'carmelita', 'khalid', 'jia', 'le', 'chirag', 'gang', 'hui', 'sayed', 'renuka', 'teresita', 'venkata', 'ganesh', 'ravi', 'kwang', 'ashwin', 'zi', 'kishore', 'ritesh', 'nirmala', 'tao', 'sook', 'lily', 'tariq', 'gaurav', 'manjit', 'juanito', 'syed', 'tuan', 'xiang', 'ke', 'fen', 'wai', 'amit', 'bin', 'meera', 'khanh', 'hee', 'diem', 'madhavi', 'yee', 'yang', 'chao', 'zhi', 'luan', 'sheng', 'cuc', 'ajay', 'ngan', 'yu', 'akbar', 'zhiyong', 'edilberto', 'takashi', 'duc', 'xiaofeng', 'phat', 'hemant', 'thuy', 'vivek', 'sridhar', 'chu', 'nitin', 'mohammad', 'wing', 'neeta', 'kuo', 'parag', 'tai', 'phung', 'ling', 'atul', 'shashi', 'lien', 'ashish', 'weiping', 'hoang', 'loc', 'fei', 'jagdish', 'shu', 'jitendra', 'po', 'shih', 'ha', 'usha', 'qi', 'hao', 'ting', 'qiu', 'xuan', 'prashant', 'nang', 'imran', 'may', 'lixin', 'rohit', 'sudha', 'estrella', 'sunil', 'soo', 'ji', 'poonam', 'kien', 'chang', 'sudhakar', 'anand', 'xu', 'abhishek', 'liem', 'anil', 'nam', 'pei', 'zheng', 'truong', 'srinivasa', 'balaji', 'chau', 'jianhua', 'kyong', 'joselito', 'rajesh', 'qiang', 'in', 'sanjay', 'gurpreet', 'asma', 'rama', 'xi', 'jasbir', 'meng', 'hiroko', 'thien', 'tu', 'xiaohong', 'danilo', 'kin', 'bao', 'kamlesh', 'ping', 'sung', 'tushar', 'vinh', 'arvind', 'padma', 'jatinder', 'soon', 'suk', 'hae', 'uday', 'jong', 'gita', 'tian', 'cam', 'sarita', 'fu', 'zhao', 'danh', 'prakash', 'min', 'rakesh', 'sang', 'parminder', 'nilesh', 'vijay', 'baldev', 'long', 'anup', 'duong', 'jianguo', 'shi', 'man', 'fan', 'so', 'myong', 'arti', 'reena', 'parul', 'rajendra', 'binh', 'kao', 'brijesh', 'indira', 'toan', 'xun', 'yung', 'chanh', 'mao', 'zhen', 'erlinda', 'hanh', 'mayank', 'hau', 'yun', 'kai', 'jayant', 'johnson', 'naveen', 'paramjit', 'jung', 'jie', 'thong', 'deepak', 'shailesh', 'ravinder', 'weimin', 'jing', 'dilip', 'yuk', 'benson', 'sachin', 'sen', 'amita', 'doan', 'si', 'rajinder', 'anila', 'sunita', 'hoi', 'phuong', 'shankar', 'hema', 'liang', 'huy', 'kyu', 'bo', 'yong', 'kang', 'meena', 'srinivasan', 'tuyen', 'sumit', 'seng', 'shyam', 'guo', 'jyoti', 'jaswinder', 'arif', 'quy', 'jignesh', 'hun', 'sivakumar', 'an', 'girish', 'son', 'thanh', 'ching', 'kieu', 'moon', 'neeraj', 'kavitha', 'praveen', 'rekha', 'bhupinder', 'guang', 'yoon', 'seema', 'masood', 'ronaldo', 'kong', 'joon', 'hetal', 'jeong', 'madhu', 'narinder', 'yue', 'linh', 'huyen', 'qin', 'khoi', 'eun', 'tung', 'trang', 'venkatesh', 'ankur', 'uma', 'zhigang', 'surendra', 'jianwei', 'lan', 'ki', 'nguyet', 'tin', 'hung', 'vaishali', 'neelam', 'daljit', 'vipul', 'hoai', 'umesh', 'yoko', 'jessy', 'mahesh', 'ka', 'ye', 'mukesh', 'quoc', 'diep', 'harish', 'kiet', 'shui', 'woo', 'gautam', 'yen', 'balwinder', 'king', 'ming', 'thai', 'raman', 'yi', 'minh', 'zhe', 'sudhir', 'tien', 'hyun', 'xue', 'dung', 'anh', 'shanti', 'sheela', 'shilpa', 'ritu', 'yin', 'rosita', 'trong', 'phu', 'thu', 'phi', 'gopal', 'kun', 'han', 'xiong', 'xing', 'lam', 'chan', 'priti', 'siu', 'tarun', 'preeti', 'kit', 'dinesh', 'lei', 'thuc', 'manish', 'asim', 'manju', 'chitra'} 
